# Supplementary material for: Decoupled neoantigen cross-presentation by dendritic cells limits anti-tumor immunity against tumors with heterogeneous neoantigen expression
Source: eLife. 2023 Aug 7;12:e85263. doi: 10.7554/eLife.85263 (PMC10425174; doi:10.7554/eLife.85263)
Supplement: Figure 1—figure supplement 1—source data 1. [file elife-85263-fig1-figsupp1-data1.xlsx]

## Sheet: Sheet1
Supplemental Figure 1A
Experiment 1 (2022_0813)
		Matched values
Cpne1		NP		R		L		B		2R		A1	A2	A3	A4	A5
Date	Day	L	W	L	W	L	W	L	W	L	W
2022-08-19	6	4.9	3.29	3.46	5.76	6.44	4.1	3.4	5.34	4.57	3.44	16.121	19.9296	26.404	18.156	15.7208
2022-08-21	8	7.18	4.66	8	5.16	7.01	5.03	7.91	4.12	2.92	7	33.4588	41.28	35.2603	32.5892	20.44
2022-08-23	10	6.16	4.68	8.74	6.36	7.35	5.42	7.62	5.33	7.8	5.95	28.8288	55.5864	39.837	40.6146	46.41
2022-08-25	12	7.32	5.52	9.76	6.9	7.49	5.68	8.09	5.32	8.27	7.8	40.4064	67.344	42.5432	43.0388	64.506
2022-08-29	16	8.1	5.98	9.41	7.74	8.3	5.7	9.56	7.2	8.8	9.19	48.438	72.8334	47.31	68.832	80.872
2022-08-31	18	8.7	6.6	9.1	9.1	9	5.6	6	8.1	7	5.8	57.42	82.81	50.4	48.6	40.6
2022-09-02	20	5.2	9.5	9.5	9.5	5.6	8.9	7	9.9	7.1	9.5	49.4	90.25	49.84	69.3	67.45
2022-09-05	23	7.2	9.3	10.9	10.9	11.6	7.7	7	9.9	7.7	9.2	66.96	118.81	89.32	69.3	70.84
mCherry		NP		R		L		B		2R		A1	A2	A3	A4	A5
Date	Day	L	W	L	W	L	W	L	W	L	W
2022-08-19	6	6.98	4.06	4.36	2.11	7.23	3.8	5.18	3.68	5.25	2.56	28.3388	9.1996	27.474	19.0624	13.44
2022-08-21	8	7.2	5.76	6.6	2.82	8.09	6.16	9.17	4.33	5.9	3.38	41.472	18.612	49.8344	39.7061	19.942
2022-08-23	10	9.24	6.98	6.85	3.87	8.55	6.58	8.87	5.35	6.58	3.94	64.4952	26.5095	56.259	47.4545	25.9252
2022-08-25	12	10.47	7.89	7.42	4.86	9.7	7.3	9.97	6.91	7	5.49	82.6083	36.0612	70.81	68.8927	38.43
2022-08-29	16	9.61	10.57	10.72	6.28	10.27	10.45	10.8	7.38	7.59	5.72	101.578	67.3216	107.322	79.704	43.4148
2022-08-31	18	11.5	9	7	8.4	10.7	12	5.8	11.2	6.1	10.7	103.5	58.8	128.4	64.96	65.27
2022-09-02	20	11.6	9.2	11.2	5.6	8.7	12	6.3	12.4	7.5	8.5	106.72	62.72	104.4	78.12	63.75
2022-09-05	23	13.1	9.5	9.9	12.7	12.3	13.4	8	11.7	7.6	11.4	124.45	125.73	164.82	93.6	86.64
Experiment 2 (2022_0815)
Cpne1		NP		R		L		B		2R		A1	A2	A3	A4	A5
Date	Day	L	W	L	W	L	W	L	W	L	W
2022-08-23	8	7.34	5.27	8.23	5.4	6.17	3.49	6.22	3.65	6.67	4.86	38.6818	44.442	21.5333	22.703	32.4162
2022-08-25	10	7.22	6.92	8.47	6.75	8.27	4.79	7.62	5.03	8.03	5.84	49.9624	57.1725	39.6133	38.3286	46.8952
2022-08-29	14	7.55	5.08	8.12	8.66	7.7	6.41	8.23	5.52	9.92	8.22	38.354	70.3192	49.357	45.4296	81.5424
2022-08-31	16	7	3.8	9.6	9.5	6.4	4.7	8.1	4.4	4.9	9.8	26.6	91.2	30.08	35.64	48.02
2022-09-02	18	4.2	7.6	5.9	8.1	4.1	5.8	4	7.4	4.6	10	31.92	47.79	23.78	29.6	46
2022-09-05	21	5.1	8.1	11.1	8.2	7	6.5	5	7.4	5.5	11.7	41.31	91.02	45.5	37	64.35
2022-09-07	23	6.6	8.7	14.6	8.7	10.1	8.4	6.6	9	12.5	7.5	57.42	127.02	84.84	59.4	93.75
2022-09-09	25	7.4	11	13.3	11.6	9.4	10.3	8.6	9.6	10.1	14.5	81.4	154.28	96.82	82.56	146.45
2022-09-12	28	8.7	11.7	14	13.8	11.3	12.8	8.8	11.2	15.5	8.4	101.79	193.2	144.64	98.56	130.2
mCherry		NP		R		L		B		2R		A1	A2	A3	A4	A5
Date	Day	L	W	L	W	L	W	L	W	L	W
2022-08-23	8	7.1	3.84	7.02	3.34	7.1	5.25	6.5	4.86	4.07	3.57	27.264	23.4468	37.275	31.59	14.5299
2022-08-25	10	8.45	7.25	9.14	4.05	8.05	6.16	8.69	7.39	4.65	4.65	61.2625	37.017	49.588	64.2191	21.6225
2022-08-29	14	9.32	8.27	9.46	5.71	9.3	6.15	9.88	8.57	5.83	4.6	77.0764	54.0166	57.195	84.6716	26.818
2022-08-31	16	4.1	8.9	5	10.7	4	9.8	5.2	10.1	5.6	8.6	36.49	53.5	39.2	52.52	48.16
2022-09-02	18	4.9	9.9	5.2	10.6	5.6	10.6	9.6	5.2	4.9	9.9	48.51	55.12	59.36	49.92	48.51
2022-09-05	21	8	10.5	6	10.2	9.4	10.5	12.3	8.4	5.6	10.2	84	61.2	98.7	103.32	57.12
2022-09-07	23	10.2	11.9	8.2	11.7	10.3	11.9	8.8	13.2	6.5	10.4	121.38	95.94	122.57	116.16	67.6
2022-09-09	25	10.2	13.5	9.2	13.5	11.1	14.1	11.1	14	7.2	10.6	137.7	124.2	156.51	155.4	76.32
2022-09-12	28	11.3	14.2	10.1	15	12	15.4	10.8	14.9	9.7	10.8	160.46	151.5	184.8	160.92	104.76
Supplemental Figure 1B
Experiment 2019_0619
Matched
mCherry	DATE	DAY:	NP	R	L	B
	2019-06-24	5	15.4242	14.84	10.248	13.5616
	2019-06-26	7	19.311	18.9125	16.3009	17.3472
	2019-06-28	9	23.6418	23.035	20.433	21.7156
	2019-07-01	12	35.7512	31.1185	31.779	27.9705
	2019-07-03	14	39.9369	35.8716	32.996	27.995
	2019-07-08	19	69.2445	62.1084	65.3004	56.6918
	2019-07-10	21	76.9406	72.674	76.328	69.803
	2019-07-12	23	91.6965	79.2774	86.2752	74.7555
	7/16 *Endpoint	27	125.383	110.843	117.139	101.506
Cpne1	DATE	DAY:	NP	R	L	B
	2019-06-24	5	11.692	11.0295	10.3875	10.032
	2019-06-26	7	16.4436	17.5565	14.7864	13.203
	2019-06-28	9	23.0364	24.924	18.4704	16.992
	2019-07-01	12	28.2768	31.3141	29.0457	25.1715
	2019-07-03	14	43.9807	45.408	34.9492	24.6966
	2019-07-08	19	70.4975	81.4374	62.1488	59.8235
	2019-07-10	21	78.5126	86.9094	72.6648	71.1382
	2019-07-12	23	100.873	108.562	90.496	82.1006
	7/16 *Endpoint	27	125.44	126.259	106.08	104.42
Supplemental Figure 1C
Experiment 1 (2019_0601)
File name	Sample	beads	bead input	cd8+ counts	tube before	tube after	tumor mass (g)	normalized cd8+	#cd8+/g tumor
Tumor_mCherry_001_038.fcs	mCherry	15336	20600	177	1.5086	1.5432	0.0346	237.754	6871.51
Tumor_mCherry_002_039.fcs	mCherry	13982	20600	599	1.4842	1.5165	0.0323	882.52	27322.6
Tumor_Cpne1_001_042.fcs	Cpne1	14689	20600	1015	1.4833	1.5147	0.0314	1423.45	45332.7
Tumor_Cpne1_002_043.fcs	Cpne1	13072	20600	972	1.4911	1.5523	0.0612	1531.76	25028.8
Experiment 2 (2021_0726)
File name	Sample	beads	bead input	cd8+ counts	tube before	tube after	tumor mass (g)	normalized cd8+	#cd8+/g tumor
tumor_day10_mCherry_001.fcs	mCherry	35707	45450	47			0.0341	59.8244	1754.38
tumor_day10_mCherry_003.fcs	mCherry	33811	45450	238			0.0558	319.928	5733.48
tumor_day10_Cpne1_001.fcs	Cpne1	36440	45450	55			0.0234	68.5991	2931.58
tumor_day10_Cpne1_002.fcs	Cpne1	37179	45450	16			0.0231	19.5594	846.729
tumor_day10_Cpne1_003.fcs	Cpne1	37171	45450	20			0.0664	24.4545	368.291
Supplemental Figure 1D
Experiment 1 (2019_0601)
File name	Sample	%CD8+ (of CD3e+ cells)
Tumor_mCherry_001_038.fcs	mCherry	6.97 %
Tumor_mCherry_002_039.fcs	mCherry	10.5 %
Tumor_Cpne1_001_042.fcs	Cpne1	16.7 %
Tumor_Cpne1_002_043.fcs	Cpne1	11.2 %
Experiment 2 (2021_0726)
File name	Sample	%CD8+ (of CD3e+ cells)
tumor_day10_mCherry_001.fcs	mCherry	1.55
tumor_day10_mCherry_003.fcs	mCherry	3.98
tumor_day10_Cpne1_001.fcs	Cpne1	5.14
tumor_day10_Cpne1_002.fcs	Cpne1	7.55
tumor_day10_Cpne1_003.fcs	Cpne1	3.62
Supplemental Figure 1E
Experiment 1 (2019_0601)
File name	Sample	%CD44+CD62L+ (of CD8+)
Tumor_mCherry_001_038.fcs	mCherry	41.2 %
Tumor_mCherry_002_039.fcs	mCherry	40.9 %
Tumor_Cpne1_001_042.fcs	Cpne1	37.8 %
Tumor_Cpne1_002_043.fcs	Cpne1	23.4 %
Experiment 2 (2021_0726)
File name	Sample	%CD44+CD62L+ (of CD8+)
tumor_day10_mCherry_001.fcs	mCherry	59.6
tumor_day10_mCherry_003.fcs	mCherry	59.7
tumor_day10_Cpne1_001.fcs	Cpne1	69.1
tumor_day10_Cpne1_002.fcs	Cpne1	75
tumor_day10_Cpne1_003.fcs	Cpne1	70
Supplemental Figure 1F
IC50 values (nM) from NetMHCpan-4.0 server
Adpgk	Cpne1	Aatf
4.29	182.34	90.16
Supplemental Figure 1G
Experiment 2021_0714
Sample	Peptide concentration [uM]	MFI mH-2Db	MFI mH-2Kb
Adpgk	100	2808	6503
	10	2920.5	5503.5
	1	2819.5	3503.5
	0.1	2545	2950
	0.01	1965	2997.5
	0.001	1394.5	3104
	0.0001	1250.5	3023
	1e-05	1233.5	3121
	1e-06	1216	2993
	1e-07	1207.5	2948
	1e-08	1206.5	3131
	1e-09	1202	3045.5
Aatf	100	1625.5	6579
	10	1813	7880.5
	1	1718.5	5402
	0.1	1691	3307.5
	0.01	1560	2779
	0.001	1288.5	2972.5
	0.0001	1185	3084.5
	1e-05	1241.5	3017.5
	1e-06	1281.5	3240
	1e-07	1151.5	2879.5
	1e-08	1152	2919.5
	1e-09	1127.5	2851.5
Cpne1	100	2558	6647.5
	10	2425.5	4169.5
	1	2156.5	2820.5
	0.1	1681.5	2557
	0.01	3158.5	3738.5	<Not plotted, population shifted in all channels (live/dead gate as well).
	0.001	1172	2386
	0.0001	1216	2707
	1e-05	1186	2575.5
	1e-06	1126	2445.5
	1e-07	1153	2483.5
	1e-08	1155.5	2336.5
	1e-09	1121.5	2103.5
