# Supplementary material for: Decoupled neoantigen cross-presentation by dendritic cells limits anti-tumor immunity against tumors with heterogeneous neoantigen expression
Source: eLife. 2023 Aug 7;12:e85263. doi: 10.7554/eLife.85263 (PMC10425174; doi:10.7554/eLife.85263)
Supplement: Figure 1—source data 1. [file elife-85263-fig1-data1.xlsx]

## Sheet: Sheet1
Figure 1A
Experiment 1 (2021_0221)
Peptide group>	Aatf			Adpgk			Cpne1
3 mice/group	Mouse 1	Mouse 2	Mouse 3	Mouse 1	Mouse 2	Mouse 3	Mouse 1	Mouse 2	Mouse 3
Peptide replicate 1	1	0	0	7	25	94	13	166	72
Peptide replicate 2	0	0	0	9	48	135	7	114	51
Media only replicate 1 (background)	0	0	0	0	0	1	0	0	0
Media only replicate 2 (background)	0	0	0	1	0	0	0	0	0
Average peptide - Averaged Media only	0.5	0	0	7.5	36.5	114	10	140	61.5	< Plotted values
Experiment 2 (2021_0725)
Peptide group>	Aatf			Adpgk			Cpne1
3 mice/group	Mouse 1	Mouse 2	Mouse 3	Mouse 1	Mouse 2	Mouse 3	Mouse 1	Mouse 2	Mouse 3
Peptide replicate 1	1	0	1	584	1027	169	54	19	5
Peptide replicate 2	0	0	0	412	982	124	36	21	1
Media only replicate 1 (background)	0	0	0	0	0	0	0	0	1
Media only replicate 2 (background)	0	0	0	0	0	0	0	1	0
Average peptide - Averaged Media only	0.5	0	0.5	498	1004.5	146.5	45	19.5	2.5	< Plotted values
Figure 1B
Schematic
Figure 1C
Experiment 1 (2020_03)
Adpgk	Day	L1	W1	L2	W2	L3	W3	L3	W3	A1	A2	A3	A4
2023-07-01	7	4.64	4.12	3.53	4.04	5.51	4.65	5.4	4.57	19.1168	14.2612	25.6215	24.678
2023-07-04	10	4.41	4.01	3.13	4.7	3.88	3.36	5.55	4.58	17.6841	14.711	13.0368	25.419
2023-07-08	14	4.44	4.35	2.49	2.49	0	0	6.62	5.55	19.314	6.2001	0	36.741
2023-07-11	17	5.57	5.07	3.68	3.51	2.69	2.87	7.57	6.53	28.2399	12.9168	7.7203	49.4321
2023-07-15	21	6.57	5.85	3.72	4.64	3.89	4.11	8.76	7.14	38.4345	17.2608	15.9879	62.5464
2023-07-18	24	7.33	6.35	4.53	4.6	4.64	4.8	9.39	8.14	46.5455	20.838	22.272	76.4346
2023-07-22	28	9.18	6.9	6.64	6	5.9	5.97	8.96	7.9	63.342	39.84	35.223	70.784
Aatf	Day	L1	W1	L2	W2	L3	W3	L3	W3	A1	A2	A3	A4
2020-07-01	7	4.63	3.9	4.21	3.73	5.16	4.33	4.92	3.81	18.057	15.7033	22.3428	18.7452
2020-07-04	10	5.78	4.87	4.64	3.98	5.11	4.15	5.55	4.38	28.1486	18.4672	21.2065	24.309
2020-07-08	14	6.61	6.67	5.28	5.07	5.86	5.26	6.13	5.44	44.0887	26.7696	30.8236	33.3472
2020-07-11	17	5.22	5.13	7.73	7.01	7.05	6.2	7.14	6.39	26.7786	54.1873	43.71	45.6246
2020-07-15	21	9.19	8.09	5.42	5.42	8.23	6.72	8.09	7.05	74.3471	29.3764	55.3056	57.0345
2020-07-18	24	9.5	7.74	7.15	6.6	8.58	7.58	8.85	7.58	73.53	47.19	65.0364	67.083
2020-07-22	28	10.75	9.36	7.23	7.05	9.27	7.98	9.76	7.99	100.62	50.9715	73.9746	77.9824
mCherry	Day	L1	W1	L2	W2	L3	W3	A1	A2	A3
2020-08-05	7	5.51	4.25	4.37	2.92	4.34	3.27	23.4175	12.7604	14.1918
2020-08-08	10	6.76	5.7	5.8	3.84	5.67	4.09	38.532	22.272	23.1903
2020-08-12	14	7.42	6.17	6.88	4.97	6.42	5.21	45.7814	34.1936	33.4482
2020-08-17	19	10	7.8	6.4	7.2	8.49	7.18	78	46.08	60.9582
2020-08-19	21	10.07	8.56	7.1	8.23	9.02	7.95	86.1992	58.433	71.709
2020-08-22	24	10.98	9.26	8.22	8.3	9.16	8.15	101.675	68.226	74.654
2020-08-26	28	13.12	10.43	9.27	9.18	11.02	9.27	136.842	85.0986	102.155
Experiment 2 (2022_0425)
Matched
Aatf		L1	W1	L2	W2	L3	W3	L4	W4	L5	W5	A1	A2	A3	A4	A5
Day	Date	NP		L		R		B		OTHER		NP	L	R	B	OTHER
6	2023-05-01	3.95	3.95	5.25	2.44	4.13	2.63	5.23	2.75	5.17	3.77	15.6025	12.81	10.8619	14.3825	19.4909
8	2023-05-03	5.85	4.6	2.54	5.72	6.58	4.24	4.54	3.8	5.6	5.67	26.91	14.5288	27.8992	17.252	31.752
10	2023-05-05	5.6	4.12	7.31	3.56	6.97	4.57	4.95	3.56	5.7	5.31	23.072	26.0236	31.8529	17.622	30.267
14	2023-05-09	6.47	5.55	8.99	4.27	8.46	4.92	6.07	4.74	7.47	6.53	35.9085	38.3873	41.6232	28.7718	48.7791
16	2023-05-11	5.54	6.35	9.53	5	8.01	5.34	4.86	5.09	8.12	5.4	35.179	47.65	42.7734	24.7374	43.848
18	2023-05-13	6.26	6.96	8.92	5.24	8.9	6.24	5.72	7.24	8.31	5.72	43.5696	46.7408	55.536	41.4128	47.5332
20	2023-05-15	6.85	7.73	10.62	7.27	9.82	7.2	6.63	7.54	9.31	6.72	52.9505	77.2074	70.704	49.9902	62.5632
23	2023-05-18	8.54	6.96	10.06	6.88	11.9	7.79	9.39	6.21	10.33	7.66	59.4384	69.2128	92.701	58.3119	79.1278
25	2023-05-20	9.22	6.85	11.13	6.92	12.32	8.21	10.14	7.38	10.69	8.26	63.157	77.0196	101.147	74.8332	88.2994
27	2023-05-22	9.07	7.85	12.3	8.47	13.03	9.03	9.04	8.08	11.28	8.83	71.1995	104.181	117.661	73.0432	99.6024
mCherry
Day	Date	NP		L		R		B		OTHER		NP	L	R	B	OTHER
6	2023-05-01	6.33	3.23	5.3	4.91	6.96	3.83	5.75	3.45	4.9	2.87	20.4459	26.023	26.6568	19.8375	14.063
8	2023-05-03	7.83	4.65	5.17	3.87	7.85	4.87	6.03	3.8	5.23	3.98	36.4095	20.0079	38.2295	22.914	20.8154
10	2023-05-05	7.01	4.66	4.99	5.24	8.16	4.39	5.47	3.49	6.42	5.14	32.6666	26.1476	35.8224	19.0903	32.9988
14	2023-05-09	9.07	5.6	7.13	6.85	8.91	6.53	7.55	5.31	6.57	6.44	50.792	48.8405	58.1823	40.0905	42.3108
16	2023-05-11	10.12	6.27	6.78	7.5	10.14	6.65	7.9	5.56	9.1	6.54	63.4524	50.85	67.431	43.924	59.514
18	2023-05-13	11.43	6.96	8.68	7.13	10.2	7.81	8.32	6.75	9.26	8.6	79.5528	61.8884	79.662	56.16	79.636
20	2023-05-15	11.67	7.04	9.53	8.27	11.2	8.2	8.8	7.08	10.36	8.94	82.1568	78.8131	91.84	62.304	92.6184
23	2023-05-18	12.48	8.65	9.7	8.63	12.31	9.66	10.63	9.69	10.74	10.37	107.952	83.711	118.915	103.005	111.374
25	2023-05-20	12.24	9.07	10.81	8.9	13.2	9.95	9.89	8.21	13.74	11.62	111.017	96.209	131.34	81.1969	159.659
27	2023-05-22	12.95	11.02	10.37	11.23	14.57	11.8	10.93	10.93	13.72	12.71	142.709	116.455	171.926	119.465	174.381
Adpgk
Day	Date	NP		L		R		B		OTHER		NP	L	R	B	OTHER
6	2023-05-01	5.86	3.08	5.91	3.75	5.17	3.36	3.52	6.34	5.01	3.24	18.0488	22.1625	17.3712	22.3168	16.2324
8	2023-05-03	6.93	3.64	5.71	4.07	5.38	4.34	7.59	4.5	5.37	3.59	25.2252	23.2397	23.3492	34.155	19.2783
10	2023-05-05	5.89	3.8	4.93	4.03	4.3	3.11	7.53	4.54	6.42	5.14	22.382	19.8679	13.373	34.1862	32.9988
14	2023-05-09	3.88	6.26	5.45	4.29	3.51	2.43	5.4	5.14	7.8	6.05	24.2888	23.3805	8.5293	27.756	47.19
16	2023-05-11	5.6	3.22	6.61	5.71	2.53	3.35	7.87	6.07	6.26	5.54	18.032	37.7431	8.4755	47.7709	34.6804
18	2023-05-13	3.38	6.47	6.63	5.77	0	0	8.89	7.31	8.19	6.54	21.8686	38.2551	0	64.9859	53.5626
20	2023-05-15	4.56	3.81	6.29	6.29	0	0	10.46	6.45	9.3	7.16	17.3736	39.5641	0	67.467	66.588
23	2023-05-18	7.91	4.93	7.1	6.39	0	0	10.74	8.59	9.31	8.42	38.9963	45.369	0	92.2566	78.3902
25	2023-05-20	9.4	4.45	7.79	7.45	0	0	11.13	8.75	9.59	9.04	41.83	58.0355	0	97.3875	86.6936
27	2023-05-22	10.76	6.1	8.62	7.96	0	0	12.17	10	10.81	9.91	65.636	68.6152	0	121.7	107.127
Figure 1D
Experiment 1 (2019_0619)
Matched
mCherry	DATE	DAY:	NP	R	L	B
	2019-06-24	5	15.4242	14.84	10.248	13.5616
	2019-06-26	7	19.311	18.9125	16.3009	17.3472
	2019-06-28	9	23.6418	23.035	20.433	21.7156
	2019-07-01	12	35.7512	31.1185	31.779	27.9705
	2019-07-03	14	39.9369	35.8716	32.996	27.995
	2019-07-08	19	69.2445	62.1084	65.3004	56.6918
	2019-07-10	21	76.9406	72.674	76.328	69.803
	2019-07-12	23	91.6965	79.2774	86.2752	74.7555
	7/16 *Endpoint	27	125.383	110.843	117.139	101.506
Adpgk	DATE	DAY:	NP	R	L	B
	2019-06-24	5	11.899	18.3654	8.892	14.4
	2019-06-26	7	16.791	26.0292	14.801	19.503
	2019-06-28	9	19.08	35.4576	14.8869	20.4725
	2019-07-01	12	25.5612	46.6188	17.459	27.3333
	2019-07-03	14	24.6	51.4962	22.8	31.7526
	2019-07-08	19	59.3816	91.8488	55.2045	71.638
	2019-07-10	21	67.4246	101.584	66.5712	77.8789
	2019-07-12	23	96.6285	122.369	80.352	98.469
	7/16 *Endpoint	27	115.493	142.13	105.172	129.391
Aatf	DATE	DAY:	NP	R	L	B
	2019-06-24	5	8.996	13.502	11.312	9.612
	2019-06-26	7	14.5666	22.8551	17.862	17.8542
	2019-06-28	9	17.94	25.92	19.2095	20.2134
	2019-07-01	12	15.8144	38.3447	23.976	26.6936
	2019-07-03	14	21.5816	39.4378	26.563	28.8792
	2019-07-08	19	49.657	83.232	59.3852	69.0077
	2019-07-10	21	45.8356	83.5488	66.5127	73.698
	2019-07-12	23	62.832	102.605	77.435	80.0064
	7/16 *Endpoint	27	80.1363	118.496	98.7255	109.992
Experiment 2 (2021_0706)
Matched
mCherry		4199		4202		4504
	Day	L1	W1	L2	W2	L3	W3	A1	A2	A3
2023-07-12	6	5.69	3.8	4.35	5.38	4.75	3.69	21.622	23.403	17.5275
2023-07-14	8	6	4.61	6.28	4.68	5.31	4.03	27.66	29.3904	21.3993
2023-07-16	10	6.25	4.78	6.23	4.77	5.28	4.18	29.875	29.7171	22.0704
2023-07-19	13	7.27	5.79	7.19	5.78	5.94	5.22	42.0933	41.5582	31.0068
2023-07-21	15	8.38	6.53	7.88	6.15	6.31	5.45	54.7214	48.462	34.3895
2023-07-23	17	8.55	7.33	8.33	6.89	6.06	6.67	62.6715	57.3937	40.4202
2023-07-26	20	9.8	7.83	9.41	7.41	8.77	7.39	76.734	69.7281	64.8103
2023-07-28	22	10.1	8.67	10.41	8.51	8.5	8.64	87.567	88.5891	73.44
2023-07-30	24	11.53	9.11	11.04	8.99	9.75	9.14	105.038	99.2496	89.115
Adpgk		4448		4449		4195
	Day	L1	W1	L2	W2	L3	W3	A1	A2	A3
2023-07-12	6	5.72	4.02	5.14	4.74	4.02	3.85	22.9944	24.3636	15.477
2023-07-14	8	7.05	5.59	6.44	5.19	5.02	4.06	39.4095	33.4236	20.3812
2023-07-16	10	6.96	5.6	6.65	5.96	5.32	4.33	38.976	39.634	23.0356
2023-07-19	13	8.05	6.53	7.49	6.54	6.19	5.09	52.5665	48.9846	31.5071
2023-07-21	15	9.22	7.46	8.71	7.31	6.85	6.04	68.7812	63.6701	41.374
2023-07-23	17	9.76	8.31	9.29	7.85	7.73	6.2	81.1056	72.9265	47.926
2023-07-26	20	11.13	9.64	10.62	9.59	8.52	8.52	107.293	101.846	72.5904
2023-07-28	22	11.16	10.13	10.81	9.39	8.96	8.78	113.051	101.506	78.6688
2023-07-30	24	11.58	10.63	11.73	10.46	9.78	9.69	123.095	122.696	94.7682
Aatf		4450		4451		4446
	Day	L1	W1	L2	W2	L3	W3	A1	A2	A3
2023-07-12	6	4.68	5.68	5.69	3.75	4.43	4.57	26.5824	21.3375	20.2451
2023-07-14	8	7.18	5.35	6.83	4.12	5.13	5.22	38.413	28.1396	26.7786
2023-07-16	10	6.75	5.87	7.22	4.61	5.6	5.6	39.6225	33.2842	31.36
2023-07-19	13	8.03	7.25	8.59	5.2	5.55	6.35	58.2175	44.668	35.2425
2023-07-21	15	8.73	7.93	9.65	6.13	7.29	7.73	69.2289	59.1545	56.3517
2023-07-23	17	9.49	8.36	6.72	10.78	8.22	7.3	79.3364	72.4416	60.006
2023-07-26	20	10.09	9.25	11.69	8.09	8.19	9.22	93.3325	94.5721	75.5118
2023-07-28	22	10.45	9.55	12.74	8.37	8.57	9.4	99.7975	106.634	80.558
2023-07-30	24	11.55	10.18	13.29	8.91	10.44	9.78	117.579	118.414	102.103
Figure 1E
Experiment 1 (2019_0601)
File name	Sample	beads	bead input	cd8+ counts	tube before	tube after	tumor mass (g)	normalized cd8+	#cd8+/g tumor
Tumor_Adpgk_001_040.fcs	Adpgk	15351	20600	1271	1.4967	1.5224	0.0257	1705.6	66365.6
Tumor_Adpgk_002_041.fcs	Adpgk	15091	20600	366	1.4898	1.5155	0.0257	499.609	19440
Tumor_Aatf_001_044.fcs	Aatf	14985	20600	1298	1.4822	1.5083	0.0261	1784.37	68366.7
Tumor_Aatf_002_045.fcs	Aatf	14600	20600	1236	1.4822	1.5258	0.0436	1743.95	39998.7
Experiment 2 (2021_0726)
File name	Sample	beads	bead input	cd8+ counts	tube before	tube after	tumor mass (g)	normalized cd8+	#cd8+/g tumor
tumor_day10_Aatf_001.fcs	Aatf	35998	45450	323			0.0486	407.81	8391.16
tumor_day10_Aatf_002.fcs	Aatf	35667	45450	204			0.0436	259.955	5962.26
tumor_day10_Aatf_003.fcs	Aatf	37083	45450	121			0.0719	148.301	2062.6
tumor_day10_Adpgk_001.fcs	Adpgk	36976	45450	448			0.0619	550.671	8896.13
tumor_day10_Adpgk_002.fcs	Adpgk	36237	45450	348			0.0602	436.477	7250.44
tumor_day10_Adpgk_003.fcs	Adpgk	35664	45450	939			0.0533	1196.66	22451.3
Experiment 3 (2020_0330)
File name	Sample	beads	bead input	cd8+ counts		tumor mass (g)	only ran half sample tumor mass/2	normalized cd8+	#cd8+/g tumor
Tumor_Aatf_001.fcs	Aatf	20996	41200	423		0.0836	0.0418	830.044	19857.5
Tumor_Aatf_002.fcs	Aatf	21174	41200	1259		0.0653	0.03265	2449.74	75030.3
Tumor_Aatf_003.fcs	Aatf	21698	41200	406		0.0711	0.03555	770.91	21685.2
Tumor_Adpgk_001.fcs	Adpgk	20707	41200	577		0.0667	0.03335	1148.04	34423.9
Tumor_Adpgk_002.fcs	Adpgk	19772	41200	1128		0.1009	0.05045	2350.48	46590.2
Tumor_Adpgk_003.fcs	Adpgk	18848	41200	1322		0.0884	0.0442	2889.77	65379.4
Experiment 4 (2021_1019)
File name	Sample	beads	bead input	cd8+ counts		tumor mass (g)	only ran half sample tumor mass/2	normalized cd8+	#cd8+/g tumor
fx-tumor_aatf_001.fcs	Aatf	25702	34685	170		0.0839	0.04195	229.416	5468.8
fx-tumor_aatf_002.fcs	Aatf	22175	34685	318		0.0996	0.0498	497.399	9987.94
fx-tumor_aatf_003.fcs	Aatf	22511	34685	141		0.0707	0.03535	217.253	6145.77
fx-tumor_adpgk_001.fcs	Adpgk	23032	34685	64		0.0839	0.04195	96.3807	2297.51
fx-tumor_adpgk_002.fcs	Adpgk	24449	34685	224		0.0996	0.0498	317.782	6381.15
fx-tumor_adpgk_003.fcs	Adpgk	23042	34685	254		0.0707	0.03535	382.345	10816
Experiment 5 (2022_0301)
File name	Sample	beads	bead input	cd8+ counts			tumor mass (g)	normalized cd8+	#cd8+/g tumor
Tumor_Aatf_001.fcs	Aatf	25598	49550	631			0.2362	1221.43	5171.15
Tumor_Aatf_002.fcs	Aatf	27234	49550	948			0.3467	1724.81	4974.93
Tumor_Aatf_003.fcs	Aatf	19861	49550	720			0.3699	1796.28	4856.13
Tumor_Adpgk_001.fcs	Adpgk	19798	49550	2759			0.2625	6905.16	26305.4
Tumor_Adpgk_002.fcs	Adpgk	15232	49550	2029			0.4299	6600.38	15353.3
Tumor_Adpgk_003.fcs	Adpgk	25484	49550	1164			0.3411	2263.23	6635.1
Experiment 6 (2022_0326)
File name	Sample	beads	bead input	cd8+ counts			tumor mass (g)	normalized cd8+	#cd8+/g tumor
Tumor_Aatf_001.fcs	Aatf	36011	48700	3300			0.1767	4462.8	25256.4
Tumor_Aatf_002.fcs	Aatf	36703	48700	4804			0.2014	6374.27	31649.8
Tumor_Aatf_003.fcs	Aatf	35098	48700	3691			0.1516	5121.42	33782.5
Tumor_Adpgk_001.fcs	Adpgk	26158	48700	15745			0.2909	29313.5	100768
Tumor_Adpgk_002.fcs	Adpgk	22233	48700	23752			0.2822	52027.3	184363
Tumor_Adpgk_003.fcs	Adpgk	28954	48700	14132			0.2679	23769.7	88726.1
Figure 1F
Experiment 1 (2019_0601)
File name	Sample	%CD8+ (of CD3e+ cells)
Tumor_Adpgk_001_040.fcs	Adpgk	28.4 %
Tumor_Adpgk_002_041.fcs	Adpgk	18.6 %
Tumor_Aatf_001_044.fcs	Aatf	18.5 %
Tumor_Aatf_002_045.fcs	Aatf	12.3 %
Experiment 2 (2021_0726)
File name	Sample	%CD8+ (of CD3e+ cells)
tumor_day10_Aatf_001.fcs	Aatf	5.42
tumor_day10_Aatf_002.fcs	Aatf	5.12
tumor_day10_Aatf_003.fcs	Aatf	4.24
tumor_day10_Adpgk_001.fcs	Adpgk	21.2
tumor_day10_Adpgk_002.fcs	Adpgk	14.6
tumor_day10_Adpgk_003.fcs	Adpgk	15.6
Experiment 3 (2020_0302)
File name	Sample	%CD8+ (of CD3e+ cells)
TUMOR_d10_aatf_001_010.fcs	Aatf	11.8
TUMOR_d10_aatf_002_011.fcs	Aatf	9.72
TUMOR_d10_aatf_003_012.fcs	Aatf	11
TUMOR_d10_adpgk_001_004.fcs	Adpgk	34.1
TUMOR_d10_adpgk_002_005.fcs	Adpgk	21.8
TUMOR_d10_adpgk_003_006.fcs	Adpgk	16.6
Experiment 4 (2020_0330)
File name	Sample	%CD8+ (of CD3e+ cells)
Tumor_Aatf_001.fcs	Aatf	2.61
Tumor_Aatf_002.fcs	Aatf	8.07
Tumor_Aatf_003.fcs	Aatf	2.64
Tumor_Adpgk_001.fcs	Adpgk	7.99
Tumor_Adpgk_002.fcs	Adpgk	6.68
Tumor_Adpgk_003.fcs	Adpgk	8.38
Experiment 5 (2021_1019)
File name	Sample	%CD8+ (of CD3e+ cells)
fx-tumor_aatf_001.fcs	Aatf	8.59
fx-tumor_aatf_002.fcs	Aatf	6.8
fx-tumor_aatf_003.fcs	Aatf	6.8
fx-tumor_adpgk_001.fcs	Adpgk	7.21
fx-tumor_adpgk_002.fcs	Adpgk	10.6
fx-tumor_adpgk_003.fcs	Adpgk	11.4
Experiment 6 (2022_0301)
File name	Sample	%CD8+ (of CD3e+ cells)
Tumor_Aatf_001.fcs	Aatf	6.93
Tumor_Aatf_002.fcs	Aatf	9.17
Tumor_Aatf_003.fcs	Aatf	6.44
Tumor_Adpgk_001.fcs	Adpgk	13.7
Tumor_Adpgk_002.fcs	Adpgk	14.9
Tumor_Adpgk_003.fcs	Adpgk	11.6
Experiment 7 (2022_0326)
File name	Sample	%CD8+ (of CD3e+ cells)
Tumor_Aatf_001.fcs	Aatf	15.3
Tumor_Aatf_002.fcs	Aatf	17.3
Tumor_Aatf_003.fcs	Aatf	21.6
Tumor_Adpgk_001.fcs	Adpgk	27.2
Tumor_Adpgk_002.fcs	Adpgk	28.1
Tumor_Adpgk_003.fcs	Adpgk	30.7
Experiment 8 (2022_0222)
File name	Sample	%CD8+ (of CD3e+ cells)
Tumor_Aatf_001.fcs	Aatf	17.5
Tumor_Aatf_002.fcs	Aatf	5.05
Tumor_Aatf_003.fcs	Aatf	9.24
Tumor_Adpgk_001.fcs	Adpgk	17.3
Tumor_Adpgk_002.fcs	Adpgk	6.05
Tumor_Adpgk_003.fcs	Adpgk	14.9
Figure 1G
Experiment 1 (2019_0601)
File name	Sample	%CD44+CD62L- (of CD8+)
Tumor_Adpgk_001_040.fcs	Adpgk	76.9 %
Tumor_Adpgk_002_041.fcs	Adpgk	62.3 %
Tumor_Aatf_001_044.fcs	Aatf	29.5 %
Tumor_Aatf_002_045.fcs	Aatf	39.6 %
Experiment 2 (2021_0726)
File name	Sample	%CD44+CD62L- (of CD8+)
tumor_day10_Aatf_001.fcs	Aatf	56
tumor_day10_Aatf_002.fcs	Aatf	66.7
tumor_day10_Aatf_003.fcs	Aatf	62
tumor_day10_Adpgk_001.fcs	Adpgk	88.6
tumor_day10_Adpgk_002.fcs	Adpgk	78.7
tumor_day10_Adpgk_003.fcs	Adpgk	87
Experiment 3 (2020_0302)
File name	Sample	%CD44+CD62L- (of CD8+)
TUMOR_d10_aatf_001_010.fcs	Aatf	23
TUMOR_d10_aatf_002_011.fcs	Aatf	37.3
TUMOR_d10_aatf_003_012.fcs	Aatf	56.4
TUMOR_d10_adpgk_001_004.fcs	Adpgk	81.1
TUMOR_d10_adpgk_002_005.fcs	Adpgk	80.3
TUMOR_d10_adpgk_003_006.fcs	Adpgk	75.3
Experiment 4 (2020_0330)
File name	Sample	%CD44+CD62L- (of CD8+)
Tumor_Aatf_001.fcs	Aatf	68.8
Tumor_Aatf_002.fcs	Aatf	90.1
Tumor_Aatf_003.fcs	Aatf	79.6
Tumor_Adpgk_001.fcs	Adpgk	88.7
Tumor_Adpgk_002.fcs	Adpgk	79.9
Tumor_Adpgk_003.fcs	Adpgk	82.1
Experiment 5 (2021_1019)
File name	Sample	%CD44+CD62L- (of CD8+)
fx-tumor_aatf_001.fcs	Aatf	74.7
fx-tumor_aatf_002.fcs	Aatf	65.4
fx-tumor_aatf_003.fcs	Aatf	66
fx-tumor_adpgk_001.fcs	Adpgk	71.9
fx-tumor_adpgk_002.fcs	Adpgk	60.3
fx-tumor_adpgk_003.fcs	Adpgk	78
Experiment 6 (2022_0301)
File name	Sample	%CD44+CD62L- (of CD8+)
Tumor_Aatf_001.fcs	Aatf	25.5
Tumor_Aatf_002.fcs	Aatf	6.01
Tumor_Aatf_003.fcs	Aatf	26.5
Tumor_Adpgk_001.fcs	Adpgk	24.5
Tumor_Adpgk_002.fcs	Adpgk	42.7
Tumor_Adpgk_003.fcs	Adpgk	34.7
Experiment 7 (2022_0326)
File name	Sample	%CD44+CD62L- (of CD8+)
Tumor_Aatf_001.fcs	Aatf	76.9
Tumor_Aatf_002.fcs	Aatf	73.1
Tumor_Aatf_003.fcs	Aatf	80.1
Tumor_Adpgk_001.fcs	Adpgk	74.9
Tumor_Adpgk_002.fcs	Adpgk	75.1
Tumor_Adpgk_003.fcs	Adpgk	79.2
Experiment 8 (2022_0222)
File name	Sample	%CD44+CD62L- (of CD8+)
Tumor_Aatf_001.fcs	Aatf	50.1
Tumor_Aatf_002.fcs	Aatf	60.9
Tumor_Aatf_003.fcs	Aatf	61.2
Tumor_Adpgk_001.fcs	Adpgk	58
Tumor_Adpgk_002.fcs	Adpgk	70.7
Tumor_Adpgk_003.fcs	Adpgk	67
Figure 1H
Experiment 1 (2016_0601)
	Aatf			Adpgk			Cpne1
Background replicate 1	6	21		4	21		6	0
Background replicate 2	6	16		2	35		0	6
Averaged background	6	18.5		3	28		3	3
Peptide 1	38	26		580	181		4	44
Averaged peptide	38	26		580	181		4	44
Avg Peptide - Avg Background	32	7.5		577	153		1	41	<Plotted values
Experiment 2 (2021_0727)
	Aatf				Adpgk				Cpne1
Background replicate 1	8	33	32		8	6	226		12	11	42
Background replicate 2	7	24	11		8	7	140		12	7	9
Averaged background	7.5	28.5	21.5		8	6.5	183		12	9	25.5
Peptide replicate 1	5	18	12		189	71	624		29	26	73
Peptide replicate 2	4	19	14		204	58	614		28	33	46
Averaged peptide	4.5	18.5	13		196.5	64.5	619		28.5	29.5	59.5
Avg Peptide - Avg Background	-3	-10	-8.5		188.5	58	436		16.5	20.5	34	<Plotted values
