# Supplementary material for: Decoupled neoantigen cross-presentation by dendritic cells limits anti-tumor immunity against tumors with heterogeneous neoantigen expression
Source: eLife. 2023 Aug 7;12:e85263. doi: 10.7554/eLife.85263 (PMC10425174; doi:10.7554/eLife.85263)
Supplement: Figure 2—figure supplement 1—source data 1. [file elife-85263-fig2-figsupp1-data1.xlsx]

## Sheet: Sheet1
Supplemental Figure 2A
Experiment 1 (2020_1126_1130_1203)
Well	Sample Name	Target Name	Task	Reporter	Quencher	Cт	Cт Mean	Cт SD	Quantity
A1		Adpgk	NTC	SYBR	None	37.0526	37.0526
A2		Adpgk	NTC	SYBR	None	Undetermined	37.0526
A3		Adpgk	STANDARD	SYBR	None	21.2905	21.3707	0.113349	10
A4		Adpgk	STANDARD	SYBR	None	21.4508	21.3707	0.113349	10
A5		Adpgk	STANDARD	SYBR	None	25.3075	25.3199	0.0174643	1
A6		Adpgk	STANDARD	SYBR	None	25.3322	25.3199	0.0174643	1
A7		Adpgk	STANDARD	SYBR	None	29.8049	30.0773	0.385302	0.1
A8		Adpgk	STANDARD	SYBR	None	30.3498	30.0773	0.385302	0.1
A9		Adpgk	STANDARD	SYBR	None	33.7015	33.0207	0.962898	0.01
A10		Adpgk	STANDARD	SYBR	None	32.3398	33.0207	0.962898	0.01
A11	12/7 1	Adpgk	UNKNOWN	SYBR	None	30.9116	31.202	0.410736	0.0424105
A12	12/7 1	Adpgk	UNKNOWN	SYBR	None	31.4925	31.202	0.410736	0.030282
B1		Aatf	NTC	SYBR	None	Undetermined
B2		Aatf	NTC	SYBR	None	Undetermined
B3		Aatf	STANDARD	SYBR	None	21.9566	21.9073	0.0697183	10
B4		Aatf	STANDARD	SYBR	None	21.858	21.9073	0.0697183	10
B5		Aatf	STANDARD	SYBR	None	24.7068	24.637	0.0987612	1
B6		Aatf	STANDARD	SYBR	None	24.5671	24.637	0.0987612	1
B7		Aatf	STANDARD	SYBR	None	30.7784	30.3006	0.675735	0.1
B8		Aatf	STANDARD	SYBR	None	29.8228	30.3006	0.675735	0.1
B9		Aatf	STANDARD	SYBR	None	32.632	32.542	0.12725	0.01
B10		Aatf	STANDARD	SYBR	None	32.452	32.542	0.12725	0.01
B11	11/29 14	Aatf	UNKNOWN	SYBR	None	24.6655	24.7659	0.142005	1.6357
B12	11/29 14	Aatf	UNKNOWN	SYBR	None	24.8663	24.7659	0.142005	1.44625
C1	1126 PI 1:10	Adpgk	UNKNOWN	SYBR	None	25.2062	24.8383	0.520254	1.15973
C2	1126 PI 1:10	Adpgk	UNKNOWN	SYBR	None	24.4704	24.8383	0.520254	1.77685
C3	1126 PI 1:100	Adpgk	UNKNOWN	SYBR	None	27.2748	27.3537	0.111648	0.349449
C4	1126 PI 1:100	Adpgk	UNKNOWN	SYBR	None	27.4327	27.3537	0.111648	0.318874
C5	1130 PI 1:100	Adpgk	UNKNOWN	SYBR	None	25.497	25.4546	0.0600023	0.97974
C6	1130 PI 1:100	Adpgk	UNKNOWN	SYBR	None	25.4121	25.4546	0.0600023	1.02916
C7	1130 PI 1:1000	Adpgk	UNKNOWN	SYBR	None	Undetermined
C8	1130 PI 1:1000	Adpgk	UNKNOWN	SYBR	None	Undetermined
C9	1203 PI 1:10	Adpgk	UNKNOWN	SYBR	None	22.5165	22.8515	0.473716	5.5174
C10	1203 PI 1:10	Adpgk	UNKNOWN	SYBR	None	23.1864	22.8515	0.473716	3.74123
C11	1203 PI 1:100	Adpgk	UNKNOWN	SYBR	None	28.5563	28.3972	0.224929	0.166207
C12	1203 PI 1:100	Adpgk	UNKNOWN	SYBR	None	28.2382	28.3972	0.224929	0.199877
D1	1126 PI 1:10	Aatf	UNKNOWN	SYBR	None	24.5457	25.0483	0.710744	1.76032
D2	1126 PI 1:10	Aatf	UNKNOWN	SYBR	None	25.5508	25.0483	0.710744	0.950673
D3	1126 PI 1:100	Aatf	UNKNOWN	SYBR	None	27.3108	27.4845	0.245647	0.323248
D4	1126 PI 1:100	Aatf	UNKNOWN	SYBR	None	27.6582	27.4845	0.245647	0.261253
D5	1130 PI 1:100	Aatf	UNKNOWN	SYBR	None	26.0165	26.1387	0.172729	0.7146
D6	1130 PI 1:100	Aatf	UNKNOWN	SYBR	None	26.2608	26.1387	0.172729	0.615232
D7	1130 PI 1:1000	Aatf	UNKNOWN	SYBR	None	Undetermined
D8	1130 PI 1:1000	Aatf	UNKNOWN	SYBR	None	Undetermined
D9	1203 PI 1:10	Aatf	UNKNOWN	SYBR	None	24.2778	24.1218	0.220631	2.0744
D10	1203 PI 1:10	Aatf	UNKNOWN	SYBR	None	23.9658	24.1218	0.220631	2.5116
D11	1203 PI 1:100	Aatf	UNKNOWN	SYBR	None	29.258	29.0233	0.331896	0.0979964
D12	1203 PI 1:100	Aatf	UNKNOWN	SYBR	None	28.7886	29.0233	0.331896	0.130663
E1	4	Adpgk	UNKNOWN	SYBR	None	29.4879	29.3807	0.151588	0.0968319
E2	5	Adpgk	UNKNOWN	SYBR	None	28.5251	28.7643	0.338344	0.169241
E3	6	Adpgk	UNKNOWN	SYBR	None	28.1246	27.9807	0.203503	0.213481
E4	13	Adpgk	UNKNOWN	SYBR	None	Undetermined
E5	14	Adpgk	UNKNOWN	SYBR	None	Undetermined	36.7739
E6	15	Adpgk	UNKNOWN	SYBR	None	Undetermined
E7	16	Adpgk	UNKNOWN	SYBR	None	24.6542	23.9703	0.967137	1.59723
E8	17	Adpgk	UNKNOWN	SYBR	None	25.1506	25.1792	0.0405203	1.19774
E9	18	Adpgk	UNKNOWN	SYBR	None	26.6141	26.6004	0.0193093	0.512599
E10	28	Adpgk	UNKNOWN	SYBR	None	23.7985	23.7608	0.0533424	2.62336
E11	29	Adpgk	UNKNOWN	SYBR	None	23.9616	24.0316	0.0991186	2.38673
E12	30	Adpgk	UNKNOWN	SYBR	None	23.8462	23.8341	0.0171352	2.55189
F1	4	Adpgk	UNKNOWN	SYBR	None	29.2735	29.3807	0.151588	0.10965
F2	5	Adpgk	UNKNOWN	SYBR	None	29.0036	28.7643	0.338344	0.128233
F3	6	Adpgk	UNKNOWN	SYBR	None	27.8368	27.9807	0.203503	0.252255
F4	13	Adpgk	UNKNOWN	SYBR	None	Undetermined
F5	14	Adpgk	UNKNOWN	SYBR	None	36.7739	36.7739		0.00141603
F6	15	Adpgk	UNKNOWN	SYBR	None	Undetermined
F7	16	Adpgk	UNKNOWN	SYBR	None	23.2865	23.9703	0.967137	3.5304
F8	17	Adpgk	UNKNOWN	SYBR	None	25.2079	25.1792	0.0405203	1.15859
F9	18	Adpgk	UNKNOWN	SYBR	None	26.5868	26.6004	0.0193093	0.520781
F10	28	Adpgk	UNKNOWN	SYBR	None	23.7231	23.7608	0.0533424	2.74067
F11	29	Adpgk	UNKNOWN	SYBR	None	24.1017	24.0316	0.0991186	2.20039
F12	30	Adpgk	UNKNOWN	SYBR	None	23.8219	23.8341	0.0171352	2.588
G1	4	Aatf	UNKNOWN	SYBR	None	23.9615	23.9615		2.51826
G2	5	Aatf	UNKNOWN	SYBR	None	23.6478	23.7202	0.102376	3.05214
G3	6	Aatf	UNKNOWN	SYBR	None	25.3728	25.5351	0.229478	1.06026
G4	13	Aatf	UNKNOWN	SYBR	None	32.1578	33.5428	1.95868	0.0165696
G5	14	Aatf	UNKNOWN	SYBR	None	31.0144	31.1261	0.157953	0.0333951
G6	15	Aatf	UNKNOWN	SYBR	None	31.2764	31.3758	0.140541	0.0284405
G7	16	Aatf	UNKNOWN	SYBR	None	24.026	24.1745	0.209991	2.42066
G8	17	Aatf	UNKNOWN	SYBR	None	23.977	24.6747	0.986776	2.49449
G9	18	Aatf	UNKNOWN	SYBR	None	24.7488	24.8357	0.122919	1.55431
G10	28	Aatf	UNKNOWN	SYBR	None	24.9767	24.9621	0.0206311	1.35167
G11	29	Aatf	UNKNOWN	SYBR	None	25.5244	25.4248	0.140884	0.966191
G12	30	Aatf	UNKNOWN	SYBR	None	25.3092	25.3638	0.0772211	1.10241
H1	4	Aatf	UNKNOWN	SYBR	None	Undetermined	23.9615
H2	5	Aatf	UNKNOWN	SYBR	None	23.7926	23.7202	0.102376	2.79296
H3	6	Aatf	UNKNOWN	SYBR	None	25.6974	25.5351	0.229478	0.869009
H4	13	Aatf	UNKNOWN	SYBR	None	34.9278	33.5428	1.95868	0.00303366
H5	14	Aatf	UNKNOWN	SYBR	None	31.2378	31.1261	0.157953	0.029122
H6	15	Aatf	UNKNOWN	SYBR	None	31.4751	31.3758	0.140541	0.0251786
H7	16	Aatf	UNKNOWN	SYBR	None	24.323	24.1745	0.209991	2.01782
H8	17	Aatf	UNKNOWN	SYBR	None	25.3725	24.6747	0.986776	1.06049
H9	18	Aatf	UNKNOWN	SYBR	None	24.9226	24.8357	0.122919	1.39722
H10	28	Aatf	UNKNOWN	SYBR	None	24.9475	24.9621	0.0206311	1.37606
H11	29	Aatf	UNKNOWN	SYBR	None	25.3252	25.4248	0.140884	1.09169
H12	30	Aatf	UNKNOWN	SYBR	None	25.4184	25.3638	0.0772211	1.03104
Calculations
Standards	Adpgk	CT1	CT2	Avg CT	Delta CT	Log10 Copy
	10000	21.2905	21.4508	21.3707	-0.160299	4
	1000	25.3075	25.3322	25.3199	-0.0246983	3
	100	29.8049	30.3498	30.0773	-0.544899	2
	10	33.7015	32.3398	33.0207	1.36174	1
	y = -3.9707x + 37.374
	R² = 0.9925
	Aatf	CT1	CT2	Avg CT	Delta CT	Log10 Copy
	10000	21.9566	21.858	21.9073	0.0985966	4
	1000	24.7068	24.5671	24.637	0.139669	3
	100	30.7784	29.8228	30.3006	0.955633	2
	10	32.632	32.452	32.542	0.179958	1
	y = -3.7568x + 36.739
	R² = 0.9714
	Redos	CT1	CT2	Avg CT	Delta CT	Log10 Copy	Copy Number	DNA Mass (pg)
	1207_1	30.9116	31.4925	31.202	-0.580868	1.55438	35.8409	220.063
	1129_14	24.6655	24.8663	24.7659	-0.200825	3.18705	1538.33	9445.33
	12/10 TD - Aatf	CT1	CT2	Avg CT	Delta CT	Log10 Copy	Copy Number	DNA Mass (pg)		12/10 TD - Adpgk	CT1	CT2	Avg CT	Delta CT	Log10 Copy	Copy Number	DNA Mass (pg)
	1126_PI 1:10	24.5457	25.5508	25.0483	-1.00514	3.11189	1293.86	7944.32		1126_PI 1:10	25.2062	24.4704	24.8383	0.73575	3.15705	1435.67	8815.01
	1126_PI 1:100	27.3108	27.6582	27.4845	-0.347397	2.46339	290.665	1784.68		1126_PI 1:100	27.2748	27.4327	27.3537	-0.157894	2.52355	333.85	2049.84
	1130_PI 1:100	26.0165	26.2608	26.1387	-0.244276	2.82164	663.187	4071.97		1130_PI 1:100	25.497	25.4121	25.4546	0.084856	3.00185	1004.26	6166.16
	1130_PI 1:1000	Undetermined	Undetermined							1130_PI 1:1000
	1203_PI 1:10	24.2778	23.9658	24.1218	0.312019	3.35849	2282.93	14017.2		1203_PI 1:10	22.5165	23.1864	22.8515	-0.669935	3.65743	4543.86	27899.3
	1203_PI 1:100	29.258	28.7886	29.0233	0.469372	2.05379	113.184	694.952		1203_PI 1:100	28.5563	28.2382	28.3972	0.318098	2.26076	182.287	1119.24
	4	23.9615	Undetermined	23.9615	#VALUE!	3.40117	2518.66	15464.6		4	29.4879	29.2735	29.3807	0.214378	2.01306	103.054	632.75
	5	23.6478	23.7926	23.7202	-0.144781	3.4654	2920.13	17929.6		5	28.5251	29.0036	28.7643	-0.478491	2.1683	147.334	904.631
	6	25.3728	25.6974	25.5351	-0.324532	2.9823	960.06	5894.77		6	28.1246	27.8368	27.9807	0.287796	2.36565	232.087	1425.01
	16	24.026	24.323	24.1745	-0.296972	3.34448	2210.44	13572.1		16	24.6542	23.2865	23.9703	1.36774	3.37565	2374.9	14581.9
	17	23.977	25.3725	24.6747	-1.39551	3.21132	1626.74	9988.2		17	25.1506	25.2079	25.1792	-0.0573044	3.0712	1178.14	7233.75
	18	24.7488	24.9226	24.8357	-0.173834	3.16848	1473.93	9049.9		18	26.6141	26.5868	26.6004	0.0273075	2.71327	516.733	3172.74
	28	24.9767	24.9475	24.9621	0.0291767	3.13483	1364.05	8375.3		28	23.7985	23.7231	23.7608	0.0754375	3.42841	2681.68	16465.5
	29	25.5244	25.3252	25.4248	0.19924	3.01166	1027.21	6307.09		29	23.9616	24.1017	24.0316	-0.140175	3.3602	2291.93	14072.5
	30	25.3092	25.4184	25.3638	-0.109207	3.02789	1066.32	6547.23		30	23.8462	23.8219	23.8341	0.0242329	3.40996	2570.18	15780.9
		Aatf/Adpgk
		01:10:00	1:100	Average
Input day 14	11/26	0.901226	0.870645	0.885936
Input day 10	11/30	0.660373		0.660373
Input day 7	12/03	0.50242	0.620912	0.561666
			Normalized to averaged input
day 14	4	24.4403	27.5869
	5	19.8198	22.3716
	6	4.13665	4.66924
day 10	16	0.930748	1.40943
	17	1.38078	2.09091
	18	2.85239	4.31936
day 7	28	0.508656	0.905621
	29	0.448186	0.797959
	30	0.414883	0.738665
Experiment 2 (2022_0120)
Plate 1/2 (Aatf)											y = mx + b		x = log10(c) = (y-b)/m
													c = 10^((y-b)/m)
Well	Sample Name	Target Name	Task	Quantity	Quencher	Cт		Sample name	Mean CT	log Qty	Qty (recalc) - copy #	Mass of Aatf (pg)		m	-3.64
A1		Aatf	NTC		None	Undetermined								b	35.5
A2		Aatf	STANDARD	10000	None	20.9234		STANDARD	20.9122	4	10177.6	62490.5		Mass genome (pg)	6.14
A3		Aatf	STANDARD	1000	None	24.3042		STANDARD	24.2996	3	1194.05	7331.48
A4		Aatf	STANDARD	100	None	27.7948		STANDARD	28.1147	2	106.89	656.303
A5		Aatf	STANDARD	10	None	32.1548		STANDARD	32.7403	1	5.73012	35.1829
A6		Aatf	STANDARD	2	None	33.4721		STANDARD	33.7082	0.30103	3.10636	19.0731
A7	d7 input	Aatf	UNKNOWN	604.126	None	25.3293		d7 input	25.3069	2.78113	631.378	3876.66
A8
A9
A10
A11	d10 input	Aatf	UNKNOWN	510.264	None	25.5964		d10 input	25.5778	2.7078	531.95	3266.17
A12
B1		Aatf	NTC		None	Undetermined
B2		Aatf	STANDARD	10000	None	20.9735
B3		Aatf	STANDARD	1000	None	24.3292
B4		Aatf	STANDARD	100	None	28.361
B5		Aatf	STANDARD	10	None	33.5937
B6		Aatf	STANDARD	2	None	32.7128
B7	d7 input	Aatf	UNKNOWN	607.645	None	25.3201
B8
B9
B10
B11	d10 input	Aatf	UNKNOWN	474.198	None	25.7123
B12
C1		Aatf	NTC		None	Undetermined
C2		Aatf	STANDARD	10000	None	20.8396
C3		Aatf	STANDARD	1000	None	24.2655
C4		Aatf	STANDARD	100	None	28.1882
C5		Aatf	STANDARD	10	None	32.4723
C6		Aatf	STANDARD	2	None	34.9397
C7	d7 input	Aatf	UNKNOWN	626.611	None	25.2715
C8
C9
C10
C11	d10 input	Aatf	UNKNOWN	568.721	None	25.4248
C12
D1
D2
D3	d14 input	Aatf	UNKNOWN	484.674	None	25.6778		d14 input	25.7087		489.692	3006.71
D4
D5
D6
D7	1 1:100	Aatf	UNKNOWN	168.524	None	27.3488		1 1:100	27.3012		178.817	1097.94
D8	2 1:100	Aatf	UNKNOWN	34.1605	None	29.8733		2 1:100	28.0092		114.261	701.564
D9	3 1:100	Aatf	UNKNOWN	139.148	None	27.6517		3 1:100	27.7189		137.299	843.017
D10	4 1:100	Aatf	UNKNOWN	71.8372	None	28.6975		4 1:100	28.7641		70.8796	435.201
D11	5 1:100	Aatf	UNKNOWN	91.4794	None	28.3152		5 1:100	28.341		92.6336	568.77
D12	6 1:100	Aatf	UNKNOWN	75.4167	None	28.6206		6 1:100	28.6874		74.4016	456.826
E1
E2
E3	d14 input	Aatf	UNKNOWN	492.854	None	25.6513
E4
E5
E6
E7	1 1:100	Aatf	UNKNOWN	160.257	None	27.4283
E8	2 1:100	Aatf	UNKNOWN	229.777	None	26.8584
E9	3 1:100	Aatf	UNKNOWN	147.475	None	27.5598
E10	4 1:100	Aatf	UNKNOWN	60.8134	None	28.961
E11	5 1:100	Aatf	UNKNOWN	97.7228	None	28.2107
E12	6 1:100	Aatf	UNKNOWN	68.2042	None	28.7796
F1
F2
F3	d14 input	Aatf	UNKNOWN	449.478	None	25.797
F4
F5
F6
F7	1 1:100	Aatf	UNKNOWN	193.932	None	27.1266
F8	2 1:100	Aatf	UNKNOWN	174.229	None	27.2961
F9	3 1:100	Aatf	UNKNOWN	115.589	None	27.9451
F10	4 1:100	Aatf	UNKNOWN	74.7902	None	28.6338
F11	5 1:100	Aatf	UNKNOWN	81.5463	None	28.497
F12	6 1:100	Aatf	UNKNOWN	73.4614	None	28.6621
G1
G2
G3
G4
G5
G6									averaged
G7	7 1:100	Aatf	UNKNOWN	264.758	None	26.6342		7 1:100	26.5713		283.756	1742.26
G8	7 1:100	Aatf	UNKNOWN	278.547	None	26.5539		9 1:100	26.6887		263.447	1617.57
G9	7 1:100	Aatf	UNKNOWN	283.546	None	26.5258		8 1:100	27.4013		167.85	1030.6
G10	9 1:100	Aatf	UNKNOWN	272.14	None	26.5907
G11	9 1:100	Aatf	UNKNOWN	268.023	None	26.6148
G12	9 1:100	Aatf	UNKNOWN	229.462	None	26.8605
H1
H2
H3
H4
H5
H6
H7	8 1:100	Aatf	UNKNOWN	178.329	None	27.2593
H8	8 1:100	Aatf	UNKNOWN	131.57	None	27.7403
H9	8 1:100	Aatf	UNKNOWN	184.643	None	27.2043
H10		Aatf	NTC		None	35.6943
H11		Aatf	NTC		None	34.6235
H12		Aatf	NTC		None	34.113
Plate 2/2 (Adpgk)
											y = mx + b		x = log10(c) = (y-b)/m
													c = 10^((y-b)/m)
Well	Sample Name	Target Name	Task	Quantity	Quencher	Cт		Sample name	Mean CT	log Qty	Qty (recalc) - copy #	Mass of Adpgk (pg)		m	-4.89
A1		Adpgk	NTC		None	Undetermined								b	32.1
A2		Adpgk	STANDARD	10000	None	28.7796		STANDARD	29.0402	4	4.22398	25.9352		Mass genome (pg)	6.14
A3		Adpgk	STANDARD	1000	None	18.3634		STANDARD	18.2379	3	683.564	4197.08
A4		Adpgk	STANDARD	100	None	21.7915		STANDARD	21.7451	2	131.091	804.896
A5		Adpgk	STANDARD	10	None	26.2616		STANDARD	25.8734	1	18.764	115.211
A6		Adpgk	STANDARD	2	None	33.6674		STANDARD	31.9352	0.30103	1.0807	6.63547
A7	d7 input	Adpgk	UNKNOWN	2078.83	None	23.7432		d7 input	23.7324	3.31782	51.4249	315.749
A8
A9
A10
A11	d10 input	Adpgk	UNKNOWN	2692.3	None	23.5982		d10 input	23.4131	3.43012	59.7682	366.977
A12
B1		Adpgk	NTC		None	Undetermined
B2	d14 input	Adpgk	STANDARD	10000	None	29.5766
B3		Adpgk	STANDARD	1000	None	18.1418
B4		Adpgk	STANDARD	100	None	21.8146
B5		Adpgk	STANDARD	10	None	25.6528
B6		Adpgk	STANDARD	2	None	30.6089
B7	d7 input	Adpgk	UNKNOWN	2557.91	None	23.6269
B8
B9
B10
B11	d10 input	Adpgk	UNKNOWN	3990.61	None	23.3776
B12
C1		Adpgk	NTC		None	Undetermined
C2		Adpgk	STANDARD	10000	None	28.7645
C3		Adpgk	STANDARD	1000	None	18.2086
C4		Adpgk	STANDARD	100	None	21.6291
C5		Adpgk	STANDARD	10	None	25.706
C6		Adpgk	STANDARD	2	None	31.5293
C7	d7 input	Adpgk	UNKNOWN	1789.96	None	23.827
C8
C9
C10
C11	d10 input	Adpgk	UNKNOWN	4892.07	None	23.2634
C12
D1
D2
D3	d14 input	Adpgk	UNKNOWN	3051.69	None	23.528		d14 input	23.6976		52.2748	320.967
D4
D5
D6
D7	1 1:100	Adpgk	UNKNOWN	9.3209	None	26.7744		1 1:100	26.913		11.5008	70.6146
D8	2 1:100	Adpgk	UNKNOWN	0.076855	None	29.4642		2 1:100	27.9767		6.96964	42.7936
D9	3 1:100	Adpgk	UNKNOWN	2.03511	None	27.6275		3 1:100	27.3566		9.33281	57.3035
D10	4 1:100	Adpgk	UNKNOWN	0.715799	None	28.2132		4 1:100	28.1255		6.49812	39.8985
D11	5 1:100	Adpgk	UNKNOWN	2.55626	None	27.4997		5 1:100	27.7918		7.60358	46.686
D12	6 1:100	Adpgk	UNKNOWN	6.12204	None	27.0101		6 1:100	27.5346		8.5826	52.6972
E1
E2
E3	d14 input	Adpgk	UNKNOWN	1389.66	None	23.9689
E4
E5
E6
E7	1 1:100	Adpgk	UNKNOWN	3.80068	None	27.2773
E8	2 1:100	Adpgk	UNKNOWN	4.24676	None	27.2151
E9	3 1:100	Adpgk	UNKNOWN	8.35521	None	26.8357
E10	4 1:100	Adpgk	UNKNOWN	0.714281	None	28.2144
E11	5 1:100	Adpgk	UNKNOWN	1.88144	None	27.6715
E12	6 1:100	Adpgk	UNKNOWN	1.86628	None	27.676
F1
F2
F3	d14 input	Adpgk	UNKNOWN	2704.01	None	23.5958
F4
F5
F6
F7	1 1:100	Adpgk	UNKNOWN	10.8861	None	26.6874
F8	2 1:100	Adpgk	UNKNOWN	3.98455	None	27.2508
F9	3 1:100	Adpgk	UNKNOWN	2.11193	None	27.6067
F10	4 1:100	Adpgk	UNKNOWN	1.14736	None	27.9487
F11	5 1:100	Adpgk	UNKNOWN	0.727285	None	28.2043
F12	6 1:100	Adpgk	UNKNOWN	1.21266	None	27.9177
G1
G2
G3
G4
G5
G6
G7	7 1:100	Adpgk	UNKNOWN	0.092958	None	29.3575		7 1:100	30.5189		2.10537	12.927
G8	7 1:100	Adpgk	UNKNOWN	0.013317	None	30.4468		9 1:100	28.4453		5.58967	34.3206
G9	7 1:100	Adpgk	UNKNOWN	0.001297	None	31.7524		8 1:100	30.8109		1.83495	11.2666
G10	9 1:100	Adpgk	UNKNOWN	0.519761	None	28.3926
G11	9 1:100	Adpgk	UNKNOWN	0.439674	None	28.4865
G12	9 1:100	Adpgk	UNKNOWN	0.463586	None	28.4568
H1
H2
H3
H4
H5
H6
H7	8 1:100	Adpgk	UNKNOWN	0.01146	None	30.531
H8	8 1:100	Adpgk	UNKNOWN	0.003267	None	31.2345
H9	8 1:100	Adpgk	UNKNOWN	0.00899	None	30.6671
H10		Adpgk	NTC		None	38.3739
H11		Adpgk	NTC		None	Undetermined
H12		Adpgk	NTC		None	37.1426
Combined analysis/calculations
	Aatf						Adpgk
	Sample name	Mean CT	log Qty	Qty (recalc) - copy #	Mass of Aatf (pg)		Sample name	Mean CT	log Qty	Qty (recalc) - copy #	Mass of Adpgk (pg)
	0	0	0	0	0		0	0	0	0	0
	STANDARD	20.9122	4	10177.6	62490.5		STANDARD	29.0402	4	4.22398	25.9352
	STANDARD	24.2996	3	1194.05	7331.48		STANDARD	18.2379	3	683.564	4197.08
	STANDARD	28.1147	2	106.89	656.303		STANDARD	21.7451	2	131.091	804.896
	STANDARD	32.7403	1	5.73012	35.1829		STANDARD	25.8734	1	18.764	115.211
	STANDARD	33.7082	0.30103	3.10636	19.0731		STANDARD	31.9352	0.30103	1.0807	6.63547
	d7 input	25.3069	2.78113	631.378	3876.66		d7 input	23.7324	3.31782	51.4249	315.749
	d10 input	25.5778	2.7078	531.95	3266.17		d10 input	23.4131	3.43012	59.7682	366.977
	d14 input	25.7087	0	489.692	3006.71		d14 input	23.6976	0	52.2748	320.967
	1 1:100	27.3012	0	178.817	1097.94		1 1:100	26.913	0	11.5008	70.6146
	2 1:100	28.0092	0	114.261	701.564		2 1:100	27.9767	0	6.96964	42.7936
	3 1:100	27.7189	0	137.299	843.017		3 1:100	27.3566	0	9.33281	57.3035
	4 1:100	28.7641	0	70.8796	435.201		4 1:100	28.1255	0	6.49812	39.8985
	5 1:100	28.341	0	92.6336	568.77		5 1:100	27.7918	0	7.60358	46.686
	6 1:100	28.6874	0	74.4016	456.826		6 1:100	27.5346	0	8.5826	52.6972
	7 1:100	26.5713	0	283.756	1742.26		7 1:100	30.5189	0	2.10537	12.927
	9 1:100	26.6887	0	263.447	1617.57		9 1:100	28.4453	0	5.58967	34.3206
	8 1:100	27.4013	0	167.85	1030.6		8 1:100	30.8109	0	1.83495	11.2666
	Averaged values for input			Averaged values for samples			diluted sample ratio / input ratio
	d7 mass ratio (aatf/adpgk)	12.2777		ratio 1d	15.5483		1d	1.26639	d7
	d10 mass ratio	8.90021		ratio 2d	16.3941		2d	1.33528
	d14 mass ratio	9.36766		ratio 3d	14.7115		3d	1.19823
				ratio 4d	10.9077		4d	1.22556	d10
				ratio 5d	12.1829		5d	1.36883		Transposed for prism
				ratio 6d	8.66888		6d	0.97401		d7	1.26639	1.33528	1.19823
				ratio 7d	134.777		7d	14.3875	d14	d10	1.22556	1.36883	0.97401
				ratio 9d	47.1311		9d	5.03126		d14	14.3875	9.76483	5.03126
				ratio 8d	91.4736		8d	9.76483
Experiment 3 (2022_0209)
Plate 1/5 INPUT
Well	Sample Name	Target Name	Task	Reporter	Quantity	Cт		Sample name	Mean CT	log Qty
A1
A2		Adpgk	STANDARD	SYBR	10000	27.364		STANDARD	27.5515	4
A3		Adpgk	STANDARD	SYBR	10000	28.5421		STANDARD
A4		Adpgk	STANDARD	SYBR	5000	28.0147		STANDARD	27.9063	3.69897
A5		Adpgk	STANDARD	SYBR	5000	27.8219		STANDARD
A6		Adpgk	STANDARD	SYBR	5000	27.8821		STANDARD
A7		Adpgk	STANDARD	SYBR	1000	29.7097		STANDARD	29.4681	3
A8		Adpgk	STANDARD	SYBR	1000	29.3913		STANDARD
A9		Adpgk	STANDARD	SYBR	1000	29.3032		STANDARD
A10		Adpgk	STANDARD	SYBR	100	32.7219		STANDARD	32.1578	2
A11		Adpgk	STANDARD	SYBR	100	32.2255		STANDARD
A12		Adpgk	STANDARD	SYBR	100	31.5259		STANDARD
B1
B2		Adpgk	STANDARD	SYBR	10	34.786		STANDARD	35.6366	1
B3		Adpgk	STANDARD	SYBR	10	35.1431		STANDARD
B4
B5
B6
B7	input 1k	Adpgk	UNKNOWN	SYBR	550.678	30.5412		input 1k	30.7289	1.48755
B8	input 1k	Adpgk	UNKNOWN	SYBR	461.813	30.748		input 1k
B9	input 1k	Adpgk	UNKNOWN	SYBR	406.616	30.8975		input 1k
B10
B11
B12
C1		Aatf	STANDARD	SYBR	10000	23.9369		STANDARD	23.961	4
C2		Aatf	STANDARD	SYBR	10000	23.8401		STANDARD
C3		Aatf	STANDARD	SYBR	10000	24.1062		STANDARD
C4		Aatf	STANDARD	SYBR	5000	24.0925		STANDARD	25.1024	3.69897
C5		Aatf	STANDARD	SYBR	5000	23.5767		STANDARD
C6		Aatf	STANDARD	SYBR	5000	27.6381		STANDARD
C7		Aatf	STANDARD	SYBR	1000	25.6456		STANDARD	25.9993	3
C8		Aatf	STANDARD	SYBR	1000	25.8938		STANDARD
C9		Aatf	STANDARD	SYBR	1000	26.4586		STANDARD
C10		Aatf	STANDARD	SYBR	100	28.5477		STANDARD	28.9208	2
C11		Aatf	STANDARD	SYBR	100	29.1542		STANDARD
C12		Aatf	STANDARD	SYBR	100	29.0607		STANDARD
D1		Aatf	STANDARD	SYBR	10	33.0072		STANDARD	32.9576	1
D2		Aatf	STANDARD	SYBR	10	33.5565		STANDARD
D3		Aatf	STANDARD	SYBR	10	32.3092		STANDARD
D4
D5
D6
D7	input 1k	Aatf	UNKNOWN	SYBR	1286.32	26.3249		input 1k	26.4797	1.42291
D8
D9	input 1k	Aatf	UNKNOWN	SYBR	1485.05	26.1453		input 1k
D10
D11
D12
E1		Adpgk	NTC	SYBR		Undetermined		NTC	#DIV/0!	#DIV/0!
E2		Adpgk	NTC	SYBR		Undetermined		NTC	#DIV/0!	#DIV/0!
E3		Adpgk	NTC	SYBR		Undetermined		NTC	#DIV/0!	#DIV/0!
E4		Adpgk	NTC	SYBR		Undetermined		NTC	#DIV/0!	#DIV/0!
E5		Adpgk	NTC	SYBR		Undetermined		NTC	#DIV/0!	#DIV/0!
E6		Adpgk	NTC	SYBR		Undetermined		NTC	#DIV/0!	#DIV/0!
E7		Aatf	NTC	SYBR		Undetermined		NTC	#DIV/0!	#DIV/0!
E8		Aatf	NTC	SYBR		Undetermined		NTC	#DIV/0!	#DIV/0!
E9		Aatf	NTC	SYBR		Undetermined		NTC	#DIV/0!	#DIV/0!
E10		Aatf	NTC	SYBR		36.9971		NTC	36.9971	1.56817
E11		Aatf	NTC	SYBR		35.7601		NTC	35.7601	1.5534
E12		Aatf	NTC	SYBR		36.138		NTC	36.138	1.55796
F1
F2
F3
F4
F5
F6
F7
F8
F9
F10
F11
F12
G1
G2
G3
G4
G5
G6
G7
G8
G9
G10
G11
G12
H1		Adpgk	STANDARD	SYBR	10000	26.7484
H2		Adpgk	STANDARD	SYBR	10	36.9805
H3
H4
H5
H6
H7	input 1k	Aatf	UNKNOWN	SYBR	768.218	26.969
H8
H9
H10
H11
H12
Calculations	Averaged values
Well	Sample Name	Target Name	Task	Reporter	Quantity	Cт		Sample name	Mean CT	log Qty	Qty - copy #	Mass of antigen (pg)
A2		Adpgk	STANDARD	SYBR	10000	27.364		STANDARD	27.5515	4
A4		Adpgk	STANDARD	SYBR	5000	28.0147		STANDARD	27.9063	3.69897
A7		Adpgk	STANDARD	SYBR	1000	29.7097		STANDARD	29.4681	3
A10		Adpgk	STANDARD	SYBR	100	32.7219		STANDARD	32.1578	2
B2		Adpgk	STANDARD	SYBR	10	34.786		STANDARD	35.6366	1
B7	input 1k	Adpgk	UNKNOWN	SYBR	550.678	30.5412		input 1k	30.7289	1.48755	0.0429857	0.0587933
C1		Aatf	STANDARD	SYBR	10000	23.9369		STANDARD	23.961	4
C4		Aatf	STANDARD	SYBR	5000	24.0925		STANDARD	25.1024	3.69897
C7		Aatf	STANDARD	SYBR	1000	25.6456		STANDARD	25.9993	3
C10		Aatf	STANDARD	SYBR	100	28.5477		STANDARD	28.9208	2
D1		Aatf	STANDARD	SYBR	10	33.0072		STANDARD	32.9576	1
D7	input 1k	Aatf	UNKNOWN	SYBR	1286.32	26.3249		input 1k	26.4797	1.42291	1.82541e-55	2.49669e-55
										x = log10(c) = (y-b)/m
										c = 10^((y-b)/m)
													m aatf	-2.88	m adpgk	-2.7
													b aatf	35.3	b adpgk	38
													Mass genome (pg)	6.14	6.14	6.14
Plate 2 (Aatf plate 1)
Well	Sample Name	Target Name	Task	Cт	Quantity	Sample name	Well no.	Mean Ct	Log(qty)
A1		Aatf	NTC	Undetermined		NTC	1	#DIV/0!	#DIV/0!
A2		Aatf	NTC	Undetermined		NTC	2	0
A3		Aatf	NTC	Undetermined		NTC	3	0
A4		Aatf	STANDARD	21.3663	10000	STANDARD	4	21.4561	4
A5		Aatf	STANDARD	21.4668	10000	STANDARD	5	0
A6		Aatf	STANDARD	21.5352	10000	STANDARD	6	0
A7		Aatf	STANDARD	24.9226	1000	STANDARD	7	24.814	3
A8		Aatf	STANDARD	24.7195	1000	STANDARD	8	0
A9		Aatf	STANDARD	24.7999	1000	STANDARD	9	0
A10		Aatf	STANDARD	28.4666	100	STANDARD	10	28.2443	2
A11		Aatf	STANDARD	27.8976	100	STANDARD	11	0
A12		Aatf	STANDARD	28.3687	100	STANDARD	12	0
B1		Aatf	STANDARD	31.6512	10	STANDARD	1	31.9839	1
B2		Aatf	STANDARD	32.1063	10	STANDARD	2	0
B3		Aatf	STANDARD	32.1943	10	STANDARD	3	0
B4		Aatf	STANDARD	33.7309	2	STANDARD	4	34.158	0.30103
B5		Aatf	STANDARD	34.18	2	STANDARD	5	0
B6		Aatf	STANDARD	34.5632	2	STANDARD	6	0
B7	1	Aatf	UNKNOWN	24.6701	1143.29	1	7	24.7207	1.39306
B8	1	Aatf	UNKNOWN	24.6641	1147.88	1	8	0
B9	1	Aatf	UNKNOWN	24.8281	1029.47	1	9	0
B10	2	Aatf	UNKNOWN	25.3852	711.182	2	10	25.4189	1.40516
B11	2	Aatf	UNKNOWN	25.3697	718.534	2	11	0
B12	2	Aatf	UNKNOWN	25.5017	658.231	2	12	0
C1	3	Aatf	UNKNOWN	25.1097	853.912	3	1	25.1509	1.40055
C2	3	Aatf	UNKNOWN	25.1614	825.07	3	2	0
C3	3	Aatf	UNKNOWN	25.1816	814.105	3	3	0
C4	4	Aatf	UNKNOWN	25.9588	485.963	4	4	26.1296	1.41713
C5	4	Aatf	UNKNOWN	26.2789	392.922	4	5	0
C6	4	Aatf	UNKNOWN	26.1512	427.675	4	6	0
C7	5	Aatf	UNKNOWN	24.6947	1124.73	5	7	24.6617	1.39202
C8	5	Aatf	UNKNOWN	24.6036	1194.89	5	8	0
C9	5	Aatf	UNKNOWN	24.6868	1130.69	5	9	0
C10	6	Aatf	UNKNOWN	24.318	1444.34	6	10	24.3979	1.38735
C11	6	Aatf	UNKNOWN	24.368	1397.22	6	11	0
C12	6	Aatf	UNKNOWN	24.5077	1273.45	6	12	0
D1	7	Aatf	UNKNOWN	25.6219	607.764	7	1	25.7003	1.40994
D2	7	Aatf	UNKNOWN	25.6879	581.72	7	2	0
D3	7	Aatf	UNKNOWN	25.7911	543.182	7	3	0
D4	8	Aatf	UNKNOWN	25.8962	506.567	8	4	25.8441	1.41236
D5	8	Aatf	UNKNOWN	25.811	536.051	8	5	0
D6	8	Aatf	UNKNOWN	25.8252	531.035	8	6	0
D7	9	Aatf	UNKNOWN	26.5504	328.121	9	7	27.2879	1.43597
D8	9	Aatf	UNKNOWN	28.8834	69.7241	9	8	0
D9	9	Aatf	UNKNOWN	26.4298	355.468	9	9	0
D10	10	Aatf	UNKNOWN	26.6301	311.213	10	10	26.548	1.42403
D11	10	Aatf	UNKNOWN	26.5036	338.48	10	11	0
D12	10	Aatf	UNKNOWN	26.5104	336.945	10	12	0
E1	11	Aatf	UNKNOWN	26.7276	291.711	11	1	26.6574	1.42582
E2	11	Aatf	UNKNOWN	26.601	317.276	11	2	0
E3	11	Aatf	UNKNOWN	26.6437	308.404	11	3	0
E4	12	Aatf	UNKNOWN	25.0189	906.956	12	4	25.1684	1.40086
E5	12	Aatf	UNKNOWN	25.1913	808.892	12	5	0
E6	12	Aatf	UNKNOWN	25.2951	755.011	12	6	0
E7	13	Aatf	UNKNOWN	25.6441	598.885	13	7	25.5776	1.40786
E8	13	Aatf	UNKNOWN	25.4658	674.108	13	8	0
E9	13	Aatf	UNKNOWN	25.6229	607.338	13	9	0
E10	14	Aatf	UNKNOWN	25.3598	723.257	14	10	25.4379	1.40548
E11	14	Aatf	UNKNOWN	25.5061	656.315	14	11	0
E12	14	Aatf	UNKNOWN	25.4477	682.267	14	12	0
F1	15	Aatf	UNKNOWN	26.6764	301.782	15	1	26.5445	1.42398
F2	15	Aatf	UNKNOWN	26.4241	356.811	15	2	0
F3	15	Aatf	UNKNOWN	26.5331	331.919	15	3	0
F4	16	Aatf	UNKNOWN	24.4621	1312.56	16	4	24.3649	1.38676
F5	16	Aatf	UNKNOWN	24.3761	1389.71	16	5	0
F6	16	Aatf	UNKNOWN	24.2565	1504.49	16	6	0
F7	17	Aatf	UNKNOWN	25.7323	564.821	17	7	25.7809	1.4113
F8	17	Aatf	UNKNOWN	25.903	504.306	17	8	0
F9	17	Aatf	UNKNOWN	25.7075	574.181	17	9	0
F10	18	Aatf	UNKNOWN	25.4355	687.83	18	10	25.2977	1.40308
F11	18	Aatf	UNKNOWN	25.1256	844.919	18	11	0
F12	18	Aatf	UNKNOWN	25.332	736.766	18	12	0
G1							1	#DIV/0!	#DIV/0!
G2							2	0
G3							3	0
G4							4	#DIV/0!	#DIV/0!
G5							5	0
G6							6	0
G7	19	Aatf	UNKNOWN	26.3657	370.915	19	7	26.3049	1.42004
G8	19	Aatf	UNKNOWN	26.3407	377.137	19	8	0
G9	19	Aatf	UNKNOWN	26.2083	411.769	19	9	0
G10	20	Aatf	UNKNOWN	25.8554	520.473	20	10	25.9967	1.41492
G11	20	Aatf	UNKNOWN	25.9729	481.42	20	11	0
G12	20	Aatf	UNKNOWN	26.1618	424.698	20	12	0
H1							1	#DIV/0!	#DIV/0!
H2							2	0
H3							3	0
H4							4	#DIV/0!	#DIV/0!
H5							5	0
H6							6	0
H7							7	#DIV/0!	#DIV/0!
H8							8	0
H9							9	0
H10							10	#DIV/0!	#DIV/0!
H11							11	0			x = log10(c) = (y-b)/m
H12							12	0			c = 10^((y-b)/m)
												m	-3.47
												b	35.3
												Mass genome (pg)	6.14
Well	Sample Name	Target Name	Task	Cт	Quantity	Sample name	Well no.	Mean Ct	Log(qty)	Qty - in copy #	Mass aatf - in pg
A4		Aatf	STANDARD	21.3663	10000	STANDARD	4	21.4561	4	9763.32	59946.8
A7		Aatf	STANDARD	24.9226	1000	STANDARD	7	24.814	3	1051.73	6457.62
A10		Aatf	STANDARD	28.4666	100	STANDARD	10	28.2443	2	107.98	662.999
B1		Aatf	STANDARD	31.6512	10	STANDARD	1	31.9839	1	9.0291	55.4387
B4		Aatf	STANDARD	33.7309	2	STANDARD	4	34.158	0.30103	2.13351	13.0998
B7	1	Aatf	UNKNOWN	24.6701	1143.29	1	7	24.7207	1.39306	1118.87	6869.87
B10	2	Aatf	UNKNOWN	25.3852	711.182	2	10	25.4189	1.40516	704.022	4322.7
C1	3	Aatf	UNKNOWN	25.1097	853.912	3	1	25.1509	1.40055	841.027	5163.91
C4	4	Aatf	UNKNOWN	25.9588	485.963	4	4	26.1296	1.41713	439.292	2697.25
C7	5	Aatf	UNKNOWN	24.6947	1124.73	5	7	24.6617	1.39202	1163.56	7144.28
C10	6	Aatf	UNKNOWN	24.318	1444.34	6	10	24.3979	1.38735	1386.18	8511.17
D1	7	Aatf	UNKNOWN	25.6219	607.764	7	1	25.7003	1.40994	584.099	3586.37
D4	8	Aatf	UNKNOWN	25.8962	506.567	8	4	25.8441	1.41236	530.921	3259.85
D7	9	Aatf	UNKNOWN	26.5504	328.121	9	7	27.2879	1.43597	203.691	1250.66
D10	10	Aatf	UNKNOWN	26.6301	311.213	10	10	26.548	1.42403	332.801	2043.4
E1	11	Aatf	UNKNOWN	26.7276	291.711	11	1	26.6574	1.42582	309.494	1900.3
E4	12	Aatf	UNKNOWN	25.0189	906.956	12	4	25.1684	1.40086	831.306	5104.22
E7	13	Aatf	UNKNOWN	25.6441	598.885	13	7	25.5776	1.40786	633.636	3890.53
E10	14	Aatf	UNKNOWN	25.3598	723.257	14	10	25.4379	1.40548	695.195	4268.5
F1	15	Aatf	UNKNOWN	26.6764	301.782	15	1	26.5445	1.42398	333.571	2048.13
F4	16	Aatf	UNKNOWN	24.4621	1312.56	16	4	24.3649	1.38676	1416.84	8699.4
F7	17	Aatf	UNKNOWN	25.7323	564.821	17	7	25.7809	1.4113	553.669	3399.53
F10	18	Aatf	UNKNOWN	25.4355	687.83	18	10	25.2977	1.40308	762.975	4684.66
G7	19	Aatf	UNKNOWN	26.3657	370.915	19	7	26.3049	1.42004	391.061	2401.11
G10	20	Aatf	UNKNOWN	25.8554	520.473	20	10	25.9967	1.41492	479.802	2945.98
Plate 3 (Aatf plate 2)
Well	Sample Name	Target Name	Task	Cт	Quantity	Sample name	Well no.	Mean Ct	Log(qty)
A1		Aatf	STANDARD	23.3731	10000	STANDARD	1	21.9748	4
A2		Aatf	STANDARD	21.3063	10000	STANDARD	2	0
A3		Aatf	STANDARD	21.245	10000	STANDARD	3	0
A4		Aatf	STANDARD	28.439	100	STANDARD	4	28.8565	2
A5		Aatf	STANDARD	28.9321	100	STANDARD	5	0
A6		Aatf	STANDARD	29.1985	100	STANDARD	6	0
A7		Aatf	STANDARD	24.8185	1000	STANDARD	7	24.7767	3
A8		Aatf	STANDARD	24.7999	1000	STANDARD	8	0
A9		Aatf	STANDARD	24.7116	1000	STANDARD	9	0
A10		Aatf	STANDARD	36.5542	10	STANDARD	10	35.867	1
A11		Aatf	STANDARD	33.9554	10	STANDARD	11	0
A12		Aatf	STANDARD	37.0914	10	STANDARD	12	0
B1		Aatf	STANDARD	Undetermined	2	STANDARD	1	33.8085	0.30103
B2		Aatf	STANDARD	Undetermined	2	STANDARD	2	0
B3		Aatf	STANDARD	33.8085	2	STANDARD	3	0
B4	21	Aatf	UNKNOWN	25.5224	1016.41	21	4	25.481	1.40622
B5	21	Aatf	UNKNOWN	25.4075	1083.38	21	5	0
B6	21	Aatf	UNKNOWN	25.513	1021.74	21	6	0
B7	22	Aatf	UNKNOWN	25.8822	832.29	22	7	25.6934	1.40982
B8	22	Aatf	UNKNOWN	25.4848	1037.87	22	8	0
B9	22	Aatf	UNKNOWN	25.7131	914.257	22	9	0
B10	23	Aatf	UNKNOWN	24.9101	1428.15	23	10	25.1189	1.4
B11	23	Aatf	UNKNOWN	25.1669	1238.3	23	11	0
B12	23	Aatf	UNKNOWN	25.2797	1163.09	23	12	0
C1	24	Aatf	UNKNOWN	26.5118	586.694	24	1	26.1339	1.4172
C2	24	Aatf	UNKNOWN	26.4597	603.933	24	2	0
C3	24	Aatf	UNKNOWN	25.4302	1069.83	24	3	0
C4	25	Aatf	UNKNOWN	25.4021	1086.61	25	4	25.4587	1.40584
C5	25	Aatf	UNKNOWN	25.3586	1113.19	25	5	0
C6	25	Aatf	UNKNOWN	25.6152	965.351	25	6	0
C7	26	Aatf	UNKNOWN	25.3788	1100.81	26	7	25.5371	1.40717
C8	26	Aatf	UNKNOWN	25.6819	930.245	26	8	0
C9	26	Aatf	UNKNOWN	25.5505	1000.67	26	9	0
C10	27	Aatf	UNKNOWN	24.9335	1409.67	27	10	25.2148	1.40166
C11	27	Aatf	UNKNOWN	25.5474	1002.39	27	11	0
C12	27	Aatf	UNKNOWN	25.1635	1240.63	27	12	0
D1	28	Aatf	UNKNOWN	25.9967	781.012	28	1	26.2508	1.41914
D2	28	Aatf	UNKNOWN	26.5048	588.964	28	2	0
D3	28	Aatf	UNKNOWN	Undetermined		28	3	0
D4	29	Aatf	UNKNOWN	25.3332	1129.01	29	4	25.4211	1.40519
D5	29	Aatf	UNKNOWN	25.4377	1065.35	29	5	0
D6	29	Aatf	UNKNOWN	25.4923	1033.56	29	6	0
D7	30	Aatf	UNKNOWN	25.5435	1004.57	30	7	26.2376	1.41892
D8	30	Aatf	UNKNOWN	27.7778	290.432	30	8	0
D9	30	Aatf	UNKNOWN	25.3915	1093.08	30	9	0
D10	31	Aatf	UNKNOWN	24.5155	1778.08	31	10	24.5294	1.38969
D11	31	Aatf	UNKNOWN	24.5184	1775.16	31	11	0
D12	31	Aatf	UNKNOWN	24.5542	1740.2	31	12	0
E1	32	Aatf	UNKNOWN	23.8416	2585.25	32	1	23.96	1.37949
E2	32	Aatf	UNKNOWN	24.2053	2112.34	32	2	0
E3	32	Aatf	UNKNOWN	23.8331	2597.4	32	3	0
E4	33	Aatf	UNKNOWN	24.9903	1365.88	33	4	25.1071	1.3998
E5	33	Aatf	UNKNOWN	25.1194	1271.37	33	5	0
E6	33	Aatf	UNKNOWN	25.2117	1207.87	33	6	0
E7	34	Aatf	UNKNOWN	25.9923	782.908	34	7	26.0807	1.41632
E8	34	Aatf	UNKNOWN	25.982	787.41	34	8	0
E9	34	Aatf	UNKNOWN	26.2678	671.832	34	9	0
E10	35	Aatf	UNKNOWN	25.1716	1235.08	35	10	25.2099	1.40157
E11	35	Aatf	UNKNOWN	25.239	1189.65	35	11	0
E12	35	Aatf	UNKNOWN	25.2192	1202.81	35	12	0
F1							1	#DIV/0!	#DIV/0!
F2							2	0
F3							3	0
F4							4	#DIV/0!	#DIV/0!
F5							5	0
F6							6	0
F7	36	Aatf	UNKNOWN	27.1281	416.627	36	7	26.9407	1.43041
F8	36	Aatf	UNKNOWN	26.7568	512.063	36	8	0
F9	36	Aatf	UNKNOWN	26.9372	463.241	36	9	0
F10							10
F11							11
F12							12
G1							1	#DIV/0!	#DIV/0!
G2							2	0
G3							3	0
G4							4	#DIV/0!	#DIV/0!
G5							5	0
G6							6	0
G7							7	#DIV/0!	#DIV/0!
G8							8	0
G9							9	0
G10		Aatf	NTC	27.7823		NTC	10	27.7899	1.44389
G11		Aatf	NTC	27.5767		NTC	11	0
G12		Aatf	NTC	28.0107		NTC	12	0
H1							1	#DIV/0!	#DIV/0!
H2							2	0
H3							3	0
H4							4	#DIV/0!	#DIV/0!
H5							5	0
H6							6	0
H7							7	#DIV/0!	#DIV/0!
H8							8	0
H9							9	0
H10							10	#DIV/0!	#DIV/0!
H11							11	0			x = log10(c) = (y-b)/m
H12							12	0			c = 10^((y-b)/m)
												m	-3.76
												b	36.8
												Mass genome (pg)	6.14
Well	Sample Name	Target Name	Task	Cт	Quantity	Sample name	Well no.	Mean Ct	Log(qty)	Qty - in copy #	Mass aatf - in pg
A1		Aatf	STANDARD	23.3731	10000	STANDARD	1	21.9748	4	#DIV/0!	#DIV/0!
A4		Aatf	STANDARD	28.439	100	STANDARD	4	28.8565	2	#DIV/0!	#DIV/0!
A7		Aatf	STANDARD	24.8185	1000	STANDARD	7	24.7767	3	#DIV/0!	#DIV/0!
A10		Aatf	STANDARD	36.5542	10	STANDARD	10	35.867	1	#DIV/0!	#DIV/0!
B1		Aatf	STANDARD	Undetermined	2	STANDARD	1	33.8085	0.30103	#DIV/0!	#DIV/0!
B4	21	Aatf	UNKNOWN	25.5224	1016.41	21	4	25.481	1.40622	#DIV/0!	#DIV/0!
B7	22	Aatf	UNKNOWN	25.8822	832.29	22	7	25.6934	1.40982	#DIV/0!	#DIV/0!
B10	23	Aatf	UNKNOWN	24.9101	1428.15	23	10	25.1189	1.4	#DIV/0!	#DIV/0!
C1	24	Aatf	UNKNOWN	26.5118	586.694	24	1	26.1339	1.4172	#DIV/0!	#DIV/0!
C4	25	Aatf	UNKNOWN	25.4021	1086.61	25	4	25.4587	1.40584	#DIV/0!	#DIV/0!
C7	26	Aatf	UNKNOWN	25.3788	1100.81	26	7	25.5371	1.40717	#DIV/0!	#DIV/0!
C10	27	Aatf	UNKNOWN	24.9335	1409.67	27	10	25.2148	1.40166	#DIV/0!	#DIV/0!
D1	28	Aatf	UNKNOWN	25.9967	781.012	28	1	26.2508	1.41914	#DIV/0!	#DIV/0!
D4	29	Aatf	UNKNOWN	25.3332	1129.01	29	4	25.4211	1.40519	#DIV/0!	#DIV/0!
D7	30	Aatf	UNKNOWN	25.5435	1004.57	30	7	26.2376	1.41892	#DIV/0!	#DIV/0!
D10	31	Aatf	UNKNOWN	24.5155	1778.08	31	10	24.5294	1.38969	#DIV/0!	#DIV/0!
E1	32	Aatf	UNKNOWN	23.8416	2585.25	32	1	23.96	1.37949	#DIV/0!	#DIV/0!
E4	33	Aatf	UNKNOWN	24.9903	1365.88	33	4	25.1071	1.3998	#DIV/0!	#DIV/0!
E7	34	Aatf	UNKNOWN	25.9923	782.908	34	7	26.0807	1.41632	#DIV/0!	#DIV/0!
E10	35	Aatf	UNKNOWN	25.1716	1235.08	35	10	25.2099	1.40157	#DIV/0!	#DIV/0!
F7	36	Aatf	UNKNOWN	27.1281	416.627	36	7	26.9407	1.43041	#DIV/0!	#DIV/0!
Plate 4 (Adpgk plate 1)
Well	Sample Name	Target Name	Task	Cт	Quantity	Sample name	Well no.	Mean Ct	Log(qty)
A1		Adpgk	NTC	Undetermined		NTC	1	#DIV/0!	#DIV/0!
A2		Adpgk	NTC	Undetermined		NTC	2	0
A3		Adpgk	NTC	Undetermined		NTC	3	0
A4		Adpgk	STANDARD	20.7633	10000	STANDARD	4	20.8935	4
A5		Adpgk	STANDARD	20.9518	10000	STANDARD	5	0
A6		Adpgk	STANDARD	20.9656	10000	STANDARD	6	0
A7		Adpgk	STANDARD	24.3151	1000	STANDARD	7	24.5108	3
A8		Adpgk	STANDARD	24.6214	1000	STANDARD	8	0
A9		Adpgk	STANDARD	24.5959	1000	STANDARD	9	0
A10		Adpgk	STANDARD	28.4241	100	STANDARD	10	28.5453	2
A11		Adpgk	STANDARD	28.8208	100	STANDARD	11	0
A12		Adpgk	STANDARD	28.3912	100	STANDARD	12	0
B1		Adpgk	STANDARD	33.6885	10	STANDARD	1	32.3183	1
B2		Adpgk	STANDARD	31.4311	10	STANDARD	2	0
B3		Adpgk	STANDARD	31.8354	10	STANDARD	3	0
B4		Adpgk	STANDARD	32.5576	2	STANDARD	4	33.0197	0.30103
B5		Adpgk	STANDARD	33.4818	2	STANDARD	5	0
B6		Adpgk	STANDARD	Undetermined	2	STANDARD	6	0
B7	1	Adpgk	UNKNOWN	26.1477	369.608	1	7	25.8293	1.41211
B8	1	Adpgk	UNKNOWN	25.4457	585.639	1	8	0
B9	1	Adpgk	UNKNOWN	25.8944	436.387	1	9	0
B10	2	Adpgk	UNKNOWN	26.6877	259.397	2	10	26.8684	1.42924
B11	2	Adpgk	UNKNOWN	26.6987	257.536	2	11	0
B12	2	Adpgk	UNKNOWN	27.2188	183.121	2	12	0
C1	3	Adpgk	UNKNOWN	26.478	297.632	3	1	26.4135	1.42183
C2	3	Adpgk	UNKNOWN	25.9939	408.815	3	2	0
C3	3	Adpgk	UNKNOWN	26.7686	245.997	3	3	0
C4	4	Adpgk	UNKNOWN	27.7558	128.778	4	4	27.6444	1.44161
C5	4	Adpgk	UNKNOWN	27.7854	126.303	4	5	0
C6	4	Adpgk	UNKNOWN	27.3921	163.455	4	6	0
C7	5	Adpgk	UNKNOWN	25.8333	454.211	5	7	25.9747	1.41455
C8	5	Adpgk	UNKNOWN	25.9324	425.651	5	8	0
C9	5	Adpgk	UNKNOWN	26.1583	367.06	5	9	0
C10	6	Adpgk	UNKNOWN	24.9936	787.744	6	10	25.1997	1.4014
C11	6	Adpgk	UNKNOWN	25.4132	598.281	6	11	0
C12	6	Adpgk	UNKNOWN	25.1923	691.504	6	12	0
D1	7	Adpgk	UNKNOWN	26.8565	232.233	7	1	26.7174	1.42679
D2	7	Adpgk	UNKNOWN	26.5697	280.266	7	2	0
D3	7	Adpgk	UNKNOWN	26.7259	252.98	7	3	0
D4	8	Adpgk	UNKNOWN	26.4809	297.071	8	4	26.7169	1.42679
D5	8	Adpgk	UNKNOWN	26.8017	240.716	8	5	0
D6	8	Adpgk	UNKNOWN	26.8682	230.453	8	6	0
D7	9	Adpgk	UNKNOWN	27.4773	154.569	9	7	28.5819	1.45609
D8	9	Adpgk	UNKNOWN	29.8988	31.5929	9	8	0
D9	9	Adpgk	UNKNOWN	28.3695	86.113	9	9	0
D10	10	Adpgk	UNKNOWN	27.1965	185.822	10	10	27.5494	1.44011
D11	10	Adpgk	UNKNOWN	27.6409	138.849	10	11	0
D12	10	Adpgk	UNKNOWN	27.8107	124.225	10	12	0
E1	11	Adpgk	UNKNOWN	27.7165	132.136	11	1	27.8059	1.44414
E2	11	Adpgk	UNKNOWN	27.9489	113.458	11	2	0
E3	11	Adpgk	UNKNOWN	27.7522	129.082	11	3	0
E4	12	Adpgk	UNKNOWN	25.9804	412.447	12	4	25.762	1.41098
E5	12	Adpgk	UNKNOWN	25.5859	534.203	12	5	0
E6	12	Adpgk	UNKNOWN	25.7195	489.414	12	6	0
E7	13	Adpgk	UNKNOWN	28.4823	79.9752	13	7	28.9857	1.46218
E8	13	Adpgk	UNKNOWN	28.9715	58.0311	13	8	0
E9	13	Adpgk	UNKNOWN	29.5033	40.9465	13	9	0
E10	14	Adpgk	UNKNOWN	26.452	302.761	14	10	26.5784	1.42453
E11	14	Adpgk	UNKNOWN	26.6373	268.112	14	11	0
E12	14	Adpgk	UNKNOWN	26.6459	266.609	14	12	0
F1	15	Adpgk	UNKNOWN	27.6211	140.664	15	1	27.5428	1.44001
F2	15	Adpgk	UNKNOWN	27.3706	165.776	15	2	0
F3	15	Adpgk	UNKNOWN	27.6368	139.226	15	3	0
F4	16	Adpgk	UNKNOWN	27.8	125.095	16	4	27.6716	1.44203
F5	16	Adpgk	UNKNOWN	27.4815	154.15	16	5	0
F6	16	Adpgk	UNKNOWN	27.7332	130.7	16	6	0
F7	17	Adpgk	UNKNOWN	27.3449	168.588	17	7	27.6381	1.44151
F8	17	Adpgk	UNKNOWN	27.7903	125.891	17	8	0
F9	17	Adpgk	UNKNOWN	27.7789	126.836	17	9	0
F10	18	Adpgk	UNKNOWN	27.6666	136.534	18	10	27.7382	1.44308
F11	18	Adpgk	UNKNOWN	27.6405	138.885	18	11	0
F12	18	Adpgk	UNKNOWN	27.9076	116.577	18	12	0
G1							1	#DIV/0!	#DIV/0!
G2							2	0
G3							3	0
G4							4	#DIV/0!	#DIV/0!
G5							5	0
G6							6	0
G7	19	Adpgk	UNKNOWN	29.4273	43.0402	19	7	29.0487	1.46313
G8	19	Adpgk	UNKNOWN	28.7059	69.0705	19	8	0
G9	19	Adpgk	UNKNOWN	29.013	56.4731	19	9	0
G10	20	Adpgk	UNKNOWN	27.1637	189.865	20	10	27.2896	1.436
G11	20	Adpgk	UNKNOWN	27.184	187.353	20	11	0
G12	20	Adpgk	UNKNOWN	27.5212	150.19	20	12	0
H1							1	#DIV/0!	#DIV/0!
H2							2	0
H3							3	0
H4							4	#DIV/0!	#DIV/0!
H5							5	0
H6							6	0
H7							7	#DIV/0!	#DIV/0!
H8							8	0
H9							9	0
H10							10	#DIV/0!	#DIV/0!
H11							11	0			x = log10(c) = (y-b)/m
H12							12	0			c = 10^((y-b)/m)
												m	-3.44
												b	34.9
Well	Sample Name	Target Name	Task	Cт	Quantity	Sample name	Well no.	Mean Ct	Log(qty)	Qty - in copy #	Mass aatf - in pg	Mass genome (pg)	6.14
A4		Adpgk	STANDARD	20.7633	10000	STANDARD	4	20.8935	4	#DIV/0!	#DIV/0!
A7		Adpgk	STANDARD	24.3151	1000	STANDARD	7	24.5108	3	#DIV/0!	#DIV/0!
A10		Adpgk	STANDARD	28.4241	100	STANDARD	10	28.5453	2	#DIV/0!	#DIV/0!
B1		Adpgk	STANDARD	33.6885	10	STANDARD	1	32.3183	1	#DIV/0!	#DIV/0!
B4		Adpgk	STANDARD	32.5576	2	STANDARD	4	33.0197	0.30103	#DIV/0!	#DIV/0!
B7	1	Adpgk	UNKNOWN	26.1477	369.608	1	7	25.8293	1.41211	#DIV/0!	#DIV/0!
B10	2	Adpgk	UNKNOWN	26.6877	259.397	2	10	26.8684	1.42924	#DIV/0!	#DIV/0!
C1	3	Adpgk	UNKNOWN	26.478	297.632	3	1	26.4135	1.42183	#DIV/0!	#DIV/0!
C4	4	Adpgk	UNKNOWN	27.7558	128.778	4	4	27.6444	1.44161	#DIV/0!	#DIV/0!
C7	5	Adpgk	UNKNOWN	25.8333	454.211	5	7	25.9747	1.41455	#DIV/0!	#DIV/0!
C10	6	Adpgk	UNKNOWN	24.9936	787.744	6	10	25.1997	1.4014	#DIV/0!	#DIV/0!
D1	7	Adpgk	UNKNOWN	26.8565	232.233	7	1	26.7174	1.42679	#DIV/0!	#DIV/0!
D4	8	Adpgk	UNKNOWN	26.4809	297.071	8	4	26.7169	1.42679	#DIV/0!	#DIV/0!
D7	9	Adpgk	UNKNOWN	27.4773	154.569	9	7	28.5819	1.45609	#DIV/0!	#DIV/0!
D10	10	Adpgk	UNKNOWN	27.1965	185.822	10	10	27.5494	1.44011	#DIV/0!	#DIV/0!
E1	11	Adpgk	UNKNOWN	27.7165	132.136	11	1	27.8059	1.44414	#DIV/0!	#DIV/0!
E4	12	Adpgk	UNKNOWN	25.9804	412.447	12	4	25.762	1.41098	#DIV/0!	#DIV/0!
E7	13	Adpgk	UNKNOWN	28.4823	79.9752	13	7	28.9857	1.46218	#DIV/0!	#DIV/0!
E10	14	Adpgk	UNKNOWN	26.452	302.761	14	10	26.5784	1.42453	#DIV/0!	#DIV/0!
F1	15	Adpgk	UNKNOWN	27.6211	140.664	15	1	27.5428	1.44001	#DIV/0!	#DIV/0!
F4	16	Adpgk	UNKNOWN	27.8	125.095	16	4	27.6716	1.44203	#DIV/0!	#DIV/0!
F7	17	Adpgk	UNKNOWN	27.3449	168.588	17	7	27.6381	1.44151	#DIV/0!	#DIV/0!
F10	18	Adpgk	UNKNOWN	27.6666	136.534	18	10	27.7382	1.44308	#DIV/0!	#DIV/0!
G7	19	Adpgk	UNKNOWN	29.4273	43.0402	19	7	29.0487	1.46313	#DIV/0!	#DIV/0!
G10	20	Adpgk	UNKNOWN	27.1637	189.865	20	10	27.2896	1.436	#DIV/0!	#DIV/0!
Plate 5/5 (Adpgk plate 2)
Well	Sample Name	Target Name	Task	Cт	Quantity	Sample name	Well no.	Mean Ct	Log(qty)
A1		Adpgk	STANDARD	22.5145	10000	STANDARD	1	21.1463	4
A2		Adpgk	STANDARD	20.486	10000	STANDARD	2	0
A3		Adpgk	STANDARD	20.4383	10000	STANDARD	3	0
A4		Adpgk	STANDARD	23.748	1000	STANDARD	4	23.7531	3
A5		Adpgk	STANDARD	23.775	1000	STANDARD	5	0
A6		Adpgk	STANDARD	23.7363	1000	STANDARD	6	0
A7		Adpgk	STANDARD	28.1918	100	STANDARD	7	27.9198	2
A8		Adpgk	STANDARD	27.715	100	STANDARD	8	0
A9		Adpgk	STANDARD	27.8526	100	STANDARD	9	0
A10		Adpgk	STANDARD	32.2984	10	STANDARD	10	31.9666	1
A11		Adpgk	STANDARD	31.7845	10	STANDARD	11	0
A12		Adpgk	STANDARD	31.8168	10	STANDARD	12	0
B1		Adpgk	STANDARD	Undetermined	2	STANDARD	1	33.1447	0.30103
B2		Adpgk	STANDARD	32.437	2	STANDARD	2	0
B3		Adpgk	STANDARD	33.8523	2	STANDARD	3	0
B4	21	Adpgk	UNKNOWN	33.3472	2.6193	21	4	33.8388	1.52941
B5	21	Adpgk	UNKNOWN	34.46	1.25527	21	5	0
B6	21	Adpgk	UNKNOWN	33.7092	2.0619	21	6	0
B7	22	Adpgk	UNKNOWN	30.7951	14.1501	22	7	30.8688	1.48952
B8	22	Adpgk	UNKNOWN	30.2827	19.8538	22	8	0
B9	22	Adpgk	UNKNOWN	31.5286	8.71385	22	9	0
B10	23	Adpgk	UNKNOWN	30.6729	15.3403	23	10	31.1048	1.49283
B11	23	Adpgk	UNKNOWN	30.2442	20.3651	23	11	0
B12	23	Adpgk	UNKNOWN	32.3971	4.90783	23	12	0
C1	24	Adpgk	UNKNOWN	27.8653	98.1238	24	1	28.1459	1.44942
C2	24	Adpgk	UNKNOWN	28.1909	79.1201	24	2	0
C3	24	Adpgk	UNKNOWN	28.3816	69.751	24	3	0
C4	25	Adpgk	UNKNOWN	33.3876	2.55015	25	4	33.7691	1.52852
C5	25	Adpgk	UNKNOWN	33.3943	2.53903	25	5	0
C6	25	Adpgk	UNKNOWN	34.5255	1.2021	25	6	0
C7	26	Adpgk	UNKNOWN	28.3205	72.6254	26	7	28.5395	1.45545
C8	26	Adpgk	UNKNOWN	28.491	64.8866	26	8	0
C9	26	Adpgk	UNKNOWN	28.8071	52.6538	26	9	0
C10	27	Adpgk	UNKNOWN	33.3511	2.61242	27	10	35.7557	1.55334
C11	27	Adpgk	UNKNOWN	34.5491	1.18352	27	11	0
C12	27	Adpgk	UNKNOWN	39.3668	0.0490056	27	12	0
D1	28	Adpgk	UNKNOWN	Undetermined		28	1	32.2494	1.50852
D2	28	Adpgk	UNKNOWN	32.1744	5.68643	28	2	0
D3	28	Adpgk	UNKNOWN	32.3244	5.1495	28	3	0
D4	29	Adpgk	UNKNOWN	33.1324	3.01888	29	4	33.435	1.5242
D5	29	Adpgk	UNKNOWN	Undetermined		29	5	0
D6	29	Adpgk	UNKNOWN	33.7376	2.02351	29	6	0
D7	30	Adpgk	UNKNOWN	32.4226	4.82596	30	7	32.7075	1.51465
D8	30	Adpgk	UNKNOWN	33.9896	1.7131	30	8	0
D9	30	Adpgk	UNKNOWN	31.7103	7.72756	30	9	0
D10	31	Adpgk	UNKNOWN	27.2121	151.102	31	10	27.1632	1.43398
D11	31	Adpgk	UNKNOWN	26.9255	182.607	31	11	0
D12	31	Adpgk	UNKNOWN	27.3519	137.764	31	12	0
E1	32	Adpgk	UNKNOWN	29.1937	40.7795	32	1	28.5294	1.45529
E2	32	Adpgk	UNKNOWN	27.9866	90.5638	32	2	0
E3	32	Adpgk	UNKNOWN	28.4078	68.5538	32	3	0
E4	33	Adpgk	UNKNOWN	33.3101	2.68428	33	4	34.0881	1.5326
E5	33	Adpgk	UNKNOWN	34.5839	1.15661	33	5	0
E6	33	Adpgk	UNKNOWN	34.3704	1.33184	33	6	0
E7	34	Adpgk	UNKNOWN	Undetermined		34	7	#DIV/0!	#DIV/0!
E8	34	Adpgk	UNKNOWN	Undetermined		34	8	0
E9	34	Adpgk	UNKNOWN	Undetermined		34	9	0
E10	35	Adpgk	UNKNOWN	28.9961	46.4691	35	10	28.7569	1.45874
E11	35	Adpgk	UNKNOWN	28.4424	67.0035	35	11	0
E12	35	Adpgk	UNKNOWN	28.832	51.7917	35	12	0
F1							1	#DIV/0!	#DIV/0!
F2							2	0
F3							3	0
F4							4	#DIV/0!	#DIV/0!
F5							5	0
F6							6	0
F7	36	Adpgk	UNKNOWN	32.4833	4.63617	36	7	32.2635	1.50871
F8	36	Adpgk	UNKNOWN	30.8086	14.0247	36	8	0
F9	36	Adpgk	UNKNOWN	33.4987	2.36961	36	9	0
F10							10
F11							11
F12							12
G1							1	#DIV/0!	#DIV/0!
G2							2	0
G3							3	0
G4							4	#DIV/0!	#DIV/0!
G5							5	0
G6							6	0
G7							7	#DIV/0!	#DIV/0!
G8							8	0
G9							9	0
G10		Adpgk	NTC	Undetermined		NTC	10	#DIV/0!	#DIV/0!
G11		Adpgk	NTC	Undetermined		NTC	11	0
G12		Adpgk	NTC	Undetermined		NTC	12	0
H1							1	#DIV/0!	#DIV/0!
H2							2	0
H3							3	0
H4							4	#DIV/0!	#DIV/0!
H5							5	0
H6							6	0
H7							7	#DIV/0!	#DIV/0!
H8							8	0
H9							9	0
H10							10	#DIV/0!	#DIV/0!
H11							11	0
H12							12	0			x = log10(c) = (y-b)/m
											c = 10^((y-b)/m)
												m	-2.09
												b	33.9
Well	Sample Name	Target Name	Task	Cт	Quantity	Sample name	Well no.	Mean Ct	Log(qty)	Qty in copy #	Mass adpgk (pg)	Mass genome (pg)	6.14
A1		Adpgk	STANDARD	22.5145	10000	STANDARD	1	24.8181	4	#DIV/0!	#DIV/0!
A4		Adpgk	STANDARD	23.748	1000	STANDARD	4	28.0794	3	#DIV/0!	#DIV/0!
A7		Adpgk	STANDARD	28.1918	100	STANDARD	7	30.2451	2	#DIV/0!	#DIV/0!
A10		Adpgk	STANDARD	32.2984	10	STANDARD	10	32.8228	1	#DIV/0!	#DIV/0!
B1		Adpgk	STANDARD	Undetermined	2	STANDARD	1	32.0711	0.30103	#DIV/0!	#DIV/0!
B4	21	Adpgk	UNKNOWN	33.3472	2.6193	21	4	31.6051	1.49976	#DIV/0!	#DIV/0!
B7	22	Adpgk	UNKNOWN	30.7951	14.1501	22	7	29.7778	1.47389	#DIV/0!	#DIV/0!
B10	23	Adpgk	UNKNOWN	30.6729	15.3403	23	10	30.6419	1.48632	#DIV/0!	#DIV/0!
C1	24	Adpgk	UNKNOWN	27.8653	98.1238	24	1	29.8578	1.47506	#DIV/0!	#DIV/0!
C4	25	Adpgk	UNKNOWN	33.3876	2.55015	25	4	31.6864	1.50087	#DIV/0!	#DIV/0!
C7	26	Adpgk	UNKNOWN	28.3205	72.6254	26	7	30.8358	1.48906	#DIV/0!	#DIV/0!
C10	27	Adpgk	UNKNOWN	33.3511	2.61242	27	10	33.2418	1.52168	#DIV/0!	#DIV/0!
D1	28	Adpgk	UNKNOWN	Undetermined		28	1	32.7775	1.51558	#DIV/0!	#DIV/0!
D4	29	Adpgk	UNKNOWN	33.1324	3.01888	29	4	30.9223	1.49027	#DIV/0!	#DIV/0!
D7	30	Adpgk	UNKNOWN	32.4226	4.82596	30	7	29.6095	1.47143	#DIV/0!	#DIV/0!
D10	31	Adpgk	UNKNOWN	27.2121	151.102	31	10	29.9053	1.47575	#DIV/0!	#DIV/0!
E1	32	Adpgk	UNKNOWN	29.1937	40.7795	32	1	31.2519	1.49488	#DIV/0!	#DIV/0!
E4	33	Adpgk	UNKNOWN	33.3101	2.68428	33	4	31.1531	1.4935	#DIV/0!	#DIV/0!
E7	34	Adpgk	UNKNOWN	Undetermined		34	7	30.7397	1.4877	#DIV/0!	#DIV/0!
E10	35	Adpgk	UNKNOWN	28.9961	46.4691	35	10	30.7397	1.4877	#DIV/0!	#DIV/0!
F7	36	Adpgk	UNKNOWN	32.4833	4.63617	36	7	32.4833	1.51166	#DIV/0!	#DIV/0!
All analysis
ALL INPUT	Sheet "Input analysis"													ALL AATF	Sheet "Aatf2 analysis" (25-36) & "Aatf analysis" (1-24)												ALL ADPGK	Sheet "Adpgk2 analysis" (25-36) & "Adpgk analysis" (1-24)												d7 1-12	d10 13-24	d14 25-36	PLOTTED VALUES
Well	Sample Name	Target Name	Task	Reporter	Quantity	Cт	0	Sample name	Mean CT	log Qty	Qty - copy #	Mass of antigen (pg)		Well	Sample Name	Target Name	Task	Cт	Quantity	Sample name	Well no.	Mean Ct	Log(qty)	Qty - in copy #	Mass aatf - in pg		Well	Sample Name	Target Name	Task	Cт	Quantity	Sample name	Well no.	Mean Ct	Log(qty)	Qty in copy #	Mass adpgk (pg)		Sample name	mass ratio Aatf/adpgk		ratio/input 1k
A2		Adpgk	STANDARD	SYBR	10000	27.364	0	STANDARD	27.5515	4	0	0		A1		Aatf	STANDARD	23.3731	10000	STANDARD	1	21.9748	4	8767.31	53831.3		A1		Adpgk	STANDARD	22.5145	10000	STANDARD	1	24.8181	4	22152	136013		STANDARD
A4		Adpgk	STANDARD	SYBR	5000	28.0147	0	STANDARD	27.9063	3.69897	0	0		A4		Aatf	STANDARD	28.439	100	STANDARD	4	28.8565	2	129.609	795.797		A4		Adpgk	STANDARD	23.748	1000	STANDARD	4	28.0794	3	609.509	3742.39		STANDARD
A7		Adpgk	STANDARD	SYBR	1000	29.7097	0	STANDARD	29.4681	3	0	0		A7		Aatf	STANDARD	24.8185	1000	STANDARD	7	24.7767	3	1576.49	9679.63		A7		Adpgk	STANDARD	28.1918	100	STANDARD	7	30.2451	2	56.074	344.295		STANDARD
A10		Adpgk	STANDARD	SYBR	100	32.7219	0	STANDARD	32.1578	2	0	0		A10		Aatf	STANDARD	36.5542	10	STANDARD	10	35.867	1	1.77067	10.8719		A10		Adpgk	STANDARD	32.2984	10	STANDARD	10	32.8228	1	3.27654	20.118		STANDARD
B2		Adpgk	STANDARD	SYBR	10	34.786	0	STANDARD	35.6366	1	0	0		B1		Aatf	STANDARD	Undetermined	2	STANDARD	1	33.8085	0.30103	6.24599	38.3504		B1		Adpgk	STANDARD	Undetermined	2	STANDARD	1	32.0711	0.30103	7.49992	46.0495		STANDARD
														B4	21	Aatf	UNKNOWN	25.5224	1016.41	21	4	25.481	1.40622	1024.2	6288.57		B4	21	Adpgk	UNKNOWN	33.3472	2.6193	21	4	31.6051	1.49976	12.5331	76.9531		21	81.7195		34.8931
B7	input 1k	Adpgk	UNKNOWN	SYBR	550.678	30.5412	0	input 1k	30.7289	1.48755	493.181	3028.13		B7	22	Aatf	UNKNOWN	25.8822	832.29	22	7	25.6934	1.40982	899.274	5521.54		B7	22	Adpgk	UNKNOWN	30.7951	14.1501	22	7	29.7778	1.47389	93.8352	576.148		22	9.58354		4.09203
														B10	23	Aatf	UNKNOWN	24.9101	1428.15	23	10	25.1189	1.4	1278.45	7849.69		B10	23	Adpgk	UNKNOWN	30.6729	15.3403	23	10	30.6419	1.48632	36.2144	222.356		23	35.3023		15.0736
C1		Aatf	STANDARD	SYBR	10000	23.9369	0	STANDARD	23.961	4	0	0		C1	24	Aatf	UNKNOWN	26.5118	586.694	24	1	26.1339	1.4172	686.651	4216.04		C1	24	Adpgk	UNKNOWN	27.8653	98.1238	24	1	29.8578	1.47506	85.9137	527.51		24	7.99233		3.41261
C4		Aatf	STANDARD	SYBR	5000	24.0925	0	STANDARD	25.1024	3.69897	0	0		C4	25	Aatf	UNKNOWN	25.4021	1086.61	25	4	25.4587	1.40584	1038.28	6375.03		C4	25	Adpgk	UNKNOWN	33.3876	2.55015	25	4	31.6864	1.50087	11.4583	70.3539		25	90.6137		38.6908
C7		Aatf	STANDARD	SYBR	1000	25.6456	0	STANDARD	25.9993	3	0	0		C7	26	Aatf	UNKNOWN	25.3788	1100.81	26	7	25.5371	1.40717	989.612	6076.22		C7	26	Adpgk	UNKNOWN	28.3205	72.6254	26	7	30.8358	1.48906	29.2487	179.587		26	33.8344		14.4468
C10		Aatf	STANDARD	SYBR	100	28.5477	0	STANDARD	28.9208	2	0	0		C10	27	Aatf	UNKNOWN	24.9335	1409.67	27	10	25.2148	1.40166	1205.51	7401.81		C10	27	Adpgk	UNKNOWN	33.3511	2.61242	27	10	33.2418	1.52168	2.06514	12.68		27	583.74		249.249
D1		Aatf	STANDARD	SYBR	10	33.0072	0	STANDARD	32.9576	1	0	0		D1	28	Aatf	UNKNOWN	25.9967	781.012	28	1	26.2508	1.41914	639.211	3924.76		D1	28	Adpgk	UNKNOWN	Undetermined		28	1	32.7775	1.51558	3.44422	21.1475		28	185.59		79.2442
														D4	29	Aatf	UNKNOWN	25.3332	1129.01	29	4	25.4211	1.40519	1062.45	6523.46		D4	29	Adpgk	UNKNOWN	33.1324	3.01888	29	4	30.9223	1.49027	26.5898	163.261		29	39.9572		17.0612
D7	input 1k	Aatf	UNKNOWN	SYBR	1286.32	26.3249	0	input 1k	26.4797	1.42291	1155.03	7091.88		D7	30	Aatf	UNKNOWN	25.5435	1004.57	30	7	26.2376	1.41892	644.403	3956.63		D7	30	Adpgk	UNKNOWN	32.4226	4.82596	30	7	29.6095	1.47143	112.951	693.519		30	5.70515		2.43602
														D10	31	Aatf	UNKNOWN	24.5155	1778.08	31	10	24.5294	1.38969	1834.26	11262.3		D10	31	Adpgk	UNKNOWN	27.2121	151.102	31	10	29.9053	1.47575	81.535	500.625		31	22.4966		9.60571
														E1	32	Aatf	UNKNOWN	23.8416	2585.25	32	1	23.96	1.37949	2599.49	15960.9		E1	32	Adpgk	UNKNOWN	29.1937	40.7795	32	1	31.2519	1.49488	18.4942	113.554		32	140.557		60.016
														E4	33	Aatf	UNKNOWN	24.9903	1365.88	33	4	25.1071	1.3998	1287.67	7906.29		E4	33	Adpgk	UNKNOWN	33.3101	2.68428	33	4	31.1531	1.4935	20.6209	126.612		33	62.4448		26.6631
							Ratio aatf/adpgk							E7	34	Aatf	UNKNOWN	25.9923	782.908	34	7	26.0807	1.41632	709.365	4355.5		E7	34	Adpgk	UNKNOWN	Undetermined		34	7	30.7397	1.4877	32.5166	199.652		34	21.8155		9.3149
								1k	2.342					E10	35	Aatf	UNKNOWN	25.1716	1235.08	35	10	25.2099	1.40157	1209.1	7423.87		E10	35	Adpgk	UNKNOWN	28.9961	46.4691	35	10	32.4726	1.51152	4.81906	29.5891		35	250.899		107.13
														F7	36	Aatf	UNKNOWN	27.1281	416.627	36	7	26.9407	1.43041	418.948	2572.34		F7	36	Adpgk	UNKNOWN	32.4833	4.63617	36	7	34.2109	1.53416	0.710007	4.35944		36	590.062		251.948
														A4		Aatf	STANDARD	21.3663	10000	STANDARD	4	21.4561	4	9763.32	59946.8		A4		Adpgk	STANDARD	20.7633	10000	STANDARD	4	20.8935	4	11793.5	72412.4		STANDARD	0.827852		0.353481
														A7		Aatf	STANDARD	24.9226	1000	STANDARD	7	24.814	3	1051.73	6457.62		A7		Adpgk	STANDARD	24.3151	1000	STANDARD	7	24.5108	3	1047.43	6431.22		STANDARD	1.00411		0.428739
														A10		Aatf	STANDARD	28.4666	100	STANDARD	10	28.2443	2	107.98	662.999		A10		Adpgk	STANDARD	28.4241	100	STANDARD	10	28.5453	2	70.353	431.967		STANDARD	1.53484		0.655353
														B1		Aatf	STANDARD	31.6512	10	STANDARD	1	31.9839	1	9.0291	55.4387		B1		Adpgk	STANDARD	33.6885	10	STANDARD	1	32.3183	1	5.62978	34.5668		STANDARD	1.60381		0.684804
														B4		Aatf	STANDARD	33.7309	2	STANDARD	4	34.158	0.30103	2.13351	13.0998		B4		Adpgk	STANDARD	32.5576	2	STANDARD	4	33.0197	0.30103	3.52042	21.6154		STANDARD	0.606039		0.25877
														B7	1	Aatf	UNKNOWN	24.6701	1143.29	1	7	24.7207	1.39306	1118.87	6869.87		B7	1	Adpgk	UNKNOWN	26.1477	369.608	1	7	25.8293	1.41211	433.348	2660.76		1	2.58192		1.10244
														B10	2	Aatf	UNKNOWN	25.3852	711.182	2	10	25.4189	1.40516	704.022	4322.7		B10	2	Adpgk	UNKNOWN	26.6877	259.397	2	10	26.8684	1.42924	216.152	1327.17		2	3.25707		1.39072
														C1	3	Aatf	UNKNOWN	25.1097	853.912	3	1	25.1509	1.40055	841.027	5163.91		C1	3	Adpgk	UNKNOWN	26.478	297.632	3	1	26.4135	1.42183	293.086	1799.55		3	2.86955		1.22526
														C4	4	Aatf	UNKNOWN	25.9588	485.963	4	4	26.1296	1.41713	439.292	2697.25		C4	4	Adpgk	UNKNOWN	27.7558	128.778	4	4	27.6444	1.44161	128.584	789.505		4	3.41639		1.45875
														C7	5	Aatf	UNKNOWN	24.6947	1124.73	5	7	24.6617	1.39202	1163.56	7144.28		C7	5	Adpgk	UNKNOWN	25.8333	454.211	5	7	25.9747	1.41455	393.165	2414.03		5	2.95948		1.26366
														C10	6	Aatf	UNKNOWN	24.318	1444.34	6	10	24.3979	1.38735	1386.18	8511.17		C10	6	Adpgk	UNKNOWN	24.9936	787.744	6	10	25.1997	1.4014	660.48	4055.35		6	2.09875		0.896137
														D1	7	Aatf	UNKNOWN	25.6219	607.764	7	1	25.7003	1.40994	584.099	3586.37		D1	7	Adpgk	UNKNOWN	26.8565	232.233	7	1	26.7174	1.42679	239.15	1468.38		7	2.44239		1.04287
														D4	8	Aatf	UNKNOWN	25.8962	506.567	8	4	25.8441	1.41236	530.921	3259.85		D4	8	Adpgk	UNKNOWN	26.4809	297.071	8	4	26.7169	1.42679	239.219	1468.81		8	2.21939		0.947648
														D7	9	Aatf	UNKNOWN	26.5504	328.121	9	7	27.2879	1.43597	203.691	1250.66		D7	9	Adpgk	UNKNOWN	27.4773	154.569	9	7	28.5819	1.45609	68.6525	421.526		9	2.96699		1.26686
														D10	10	Aatf	UNKNOWN	26.6301	311.213	10	10	26.548	1.42403	332.801	2043.4		D10	10	Adpgk	UNKNOWN	27.1965	185.822	10	10	27.5494	1.44011	137.03	841.365		10	2.42867		1.03701
														E1	11	Aatf	UNKNOWN	26.7276	291.711	11	1	26.6574	1.42582	309.494	1900.3		E1	11	Adpgk	UNKNOWN	27.7165	132.136	11	1	27.8059	1.44414	115.411	708.626		11	2.68166		1.14503
														E4	12	Aatf	UNKNOWN	25.0189	906.956	12	4	25.1684	1.40086	831.306	5104.22		E4	12	Adpgk	UNKNOWN	25.9804	412.447	12	4	25.762	1.41098	453.322	2783.39		12	1.83381		0.783011
														E7	13	Aatf	UNKNOWN	25.6441	598.885	13	7	25.5776	1.40786	633.636	3890.53		E7	13	Adpgk	UNKNOWN	28.4823	79.9752	13	7	28.9857	1.46218	52.3931	321.693		13	12.0939		5.16392
														E10	14	Aatf	UNKNOWN	25.3598	723.257	14	10	25.4379	1.40548	695.195	4268.5		E10	14	Adpgk	UNKNOWN	26.452	302.761	14	10	26.5784	1.42453	262.462	1611.52		14	2.64874		1.13098
														F1	15	Aatf	UNKNOWN	26.6764	301.782	15	1	26.5445	1.42398	333.571	2048.13		F1	15	Adpgk	UNKNOWN	27.6211	140.664	15	1	27.5428	1.44001	137.63	845.05		15	2.42368		1.03488
														F4	16	Aatf	UNKNOWN	24.4621	1312.56	16	4	24.3649	1.38676	1416.84	8699.4		F4	16	Adpgk	UNKNOWN	27.8	125.095	16	4	27.6716	1.44203	126.268	775.286		16	11.2209		4.79116
														F7	17	Aatf	UNKNOWN	25.7323	564.821	17	7	25.7809	1.4113	553.669	3399.53		F7	17	Adpgk	UNKNOWN	27.3449	168.588	17	7	27.6381	1.44151	129.13	792.86		17	4.28768		1.83078
														F10	18	Aatf	UNKNOWN	25.4355	687.83	18	10	25.2977	1.40308	762.975	4684.66		F10	18	Adpgk	UNKNOWN	27.6666	136.534	18	10	27.7382	1.44308	120.757	741.449		18	6.31826		2.69781
														G7	19	Aatf	UNKNOWN	26.3657	370.915	19	7	26.3049	1.42004	391.061	2401.11		G7	19	Adpgk	UNKNOWN	29.4273	43.0402	19	7	29.0487	1.46313	50.2294	308.408		19	7.7855		3.3243
Samples														G10	20	Aatf	UNKNOWN	25.8554	520.473	20	10	25.9967	1.41492	479.802	2945.98		G10	20	Adpgk	UNKNOWN	27.1637	189.865	20	10	27.2896	1.436	163.052	1001.14		20	2.94263		1.25646
d7 1-12	d10 13-24	d14 25-36
	PLOTTED
d7	1.10244	1.39072	1.22526	1.45875	1.26366	0.896137	1.04287	0.947648	1.26686	1.03701	1.14503	0.783011
d10	5.16392	1.13098	1.03488	4.79116	1.83078	2.69781	3.3243	1.25646	34.8931	4.09203	15.0736	3.41261
d14	38.6908	14.4468	249.249	79.2442	17.0612	2.43602	9.60571	60.016	26.6631	9.3149	107.13	251.948
Supplemental Figure 2B
Experiment 1 (2022_0331)
Samples collected 14 days post-tumor implantation
Plate 1
Analysis
Standards	Adpgk
Well	Sample Name	Target Name	Task	Cт	Quantity	Sample name	Well no.	Mean Ct	Log(qty)
		Adpgk	NTC			NTC	1	#DIV/0!	#DIV/0!
		Adpgk	NTC			NTC	2	0
		Adpgk	NTC			NTC	3	0
A2		Adpgk	STANDARD	23.372	10000	STANDARD	4	23.4092	4
A3		Adpgk	STANDARD	23.3138	10000	STANDARD	5	0
D10		Adpgk	STANDARD	23.5418	10000	STANDARD	6	0
A4		Adpgk	STANDARD	24.2764	5000	STANDARD	7	24.3162	3.69897
A5		Adpgk	STANDARD	24.3565	5000	STANDARD	8	0
A6		Adpgk	STANDARD	24.3157	5000	STANDARD	9	0
A7		Adpgk	STANDARD	26.4755	1000	STANDARD	10	26.5508	3
A8		Adpgk	STANDARD	26.7118	1000	STANDARD	11	0
A9		Adpgk	STANDARD	26.4652	1000	STANDARD	12	0
A10		Adpgk	STANDARD	30.0466	100	STANDARD	1	30.1478	2
A11		Adpgk	STANDARD	30.188	100	STANDARD	2	0
A12		Adpgk	STANDARD	30.2086	100	STANDARD	3	0
B1		Adpgk	STANDARD	33.7683	10	STANDARD	4	34.5541	1
B2		Adpgk	STANDARD	35.3317	10	STANDARD	5	0
B3		Adpgk	STANDARD	34.5624	10	STANDARD	6	0			x = log10(c) = (y-b)/m
											c = 10^((y-b)/m)
Standards	Aatf											m	-3.689
Well	Sample Name	Target Name	Task	Cт	Quantity	Sample name	Well no.	Mean Ct	Log(qty)			b	37.903
		Aatf	NTC			NTC	1	#DIV/0!	#DIV/0!			Mass genome (pg)	6.14
		Aatf	NTC			NTC	2	0
		Aatf	NTC			NTC	3	0
E1		Aatf	STANDARD	22.9051	10000	STANDARD	4	22.9701	4
E2		Aatf	STANDARD	22.861	10000	STANDARD	5	0
E3		Aatf	STANDARD	23.1441	10000	STANDARD	6	0
E4		Aatf	STANDARD	23.7586	5000	STANDARD	7	23.7569	3.69897
E5		Aatf	STANDARD	23.7638	5000	STANDARD	8	0
E6		Aatf	STANDARD	23.7483	5000	STANDARD	9	0
E7		Aatf	STANDARD	25.9115	1000	STANDARD	10	25.9891	3
E8		Aatf	STANDARD	26.0751	1000	STANDARD	11	0
E9		Aatf	STANDARD	25.9807	1000	STANDARD	12	0
E10		Aatf	STANDARD	29.6405	100	STANDARD	1	29.6737	2
E11		Aatf	STANDARD	29.5226	100	STANDARD	2	0
E12		Aatf	STANDARD	29.8582	100	STANDARD	3	0
F1		Aatf	STANDARD	35.1651	10	STANDARD	4	35.2144	1
F2		Aatf	STANDARD	35.7266	10	STANDARD	5	0
F3		Aatf	STANDARD	34.7516	10	STANDARD	6	0
											x = log10(c) = (y-b)/m
											c = 10^((y-b)/m)
												m	-4.0198
												b	38.534
												Mass genome (pg)	6.14
ADPGK
Well	Sample Name	Target Name	Task	Cт	Quantity	Sample name	Well no.	Mean Ct	log qt calc	calculated quant	Mass aatf - in pg
A2		Adpgk	STANDARD	23.372	10000			23.372	3.93902	8689.95	53356.3
A3		Adpgk	STANDARD	23.3138	10000			23.3138	3.95478	9011.23	55329
D10		Adpgk	STANDARD	23.5418	10000			23.5418	3.89298	7815.95	47989.9
A4		Adpgk	STANDARD	24.2764	5000			24.2764	3.69384	4941.31	30339.6
A5		Adpgk	STANDARD	24.3565	5000			24.3565	3.67213	4700.3	28859.9
A6		Adpgk	STANDARD	24.3157	5000			24.3157	3.6832	4821.74	29605.5
A7		Adpgk	STANDARD	26.4755	1000			26.4755	3.09773	1252.37	7689.54
A8		Adpgk	STANDARD	26.7118	1000			26.7118	3.03366	1080.6	6634.86
A9		Adpgk	STANDARD	26.4652	1000			26.4652	3.10051	1260.41	7738.93
A10		Adpgk	STANDARD	30.0466	100			30.0466	2.12967	134.795	827.641
A11		Adpgk	STANDARD	30.188	100			30.188	2.09135	123.41	757.736
A12		Adpgk	STANDARD	30.2086	100			30.2086	2.08576	121.832	748.049
B1		Adpgk	STANDARD	33.7683	10			33.7683	1.12081	13.2071	81.0918
B2		Adpgk	STANDARD	35.3317	10			35.3317	0.69703	4.97771	30.5631
B3		Adpgk	STANDARD	34.5624	10			34.5624	0.905555	8.04553	49.3996
B4	9	Adpgk	UNKNOWN	33.2315	18.4611			33.2315	1.26634	18.4646	113.373	96.9316
B5	9	Adpgk	UNKNOWN	33.2078	18.7359			33.2078	1.27276	18.7394	115.06
B6	9	Adpgk	UNKNOWN	34.1891	10.1548			34.1891	1.00675	10.1567	62.3622
B7	10	Adpgk	UNKNOWN	32.105	37.2921			32.105	1.5717	37.299	229.016	270.919
B8	10	Adpgk	UNKNOWN	31.9657	40.681			31.9657	1.60947	40.6886	249.828
B9	10	Adpgk	UNKNOWN	31.5009	54.3729			31.5009	1.73546	54.3831	333.912
B10	11	Adpgk	UNKNOWN	34.2396	9.83987			34.2396	0.99307	9.84171	60.4281	74.2985
B11	11	Adpgk	UNKNOWN	33.414	16.4735			33.414	1.21687	16.4766	101.166
B12	11	Adpgk	UNKNOWN	34.2166	9.98207			34.2166	0.999302	9.98394	61.3014
C1	12	Adpgk	UNKNOWN	31.3402	60.1092			31.3402	1.77902	60.1204	369.14	318.43
C2	12	Adpgk	UNKNOWN	32.3366	32.2723			32.3366	1.50891	32.2784	198.189
C3	12	Adpgk	UNKNOWN	31.2605	63.174			31.2605	1.80062	63.1859	387.961
C4	5	Adpgk	UNKNOWN	30.911	78.5763			30.911	1.89537	78.591	482.549	444.823
C5	5	Adpgk	UNKNOWN	30.8205	83.1436			30.8205	1.91991	83.1592	510.597
C6	5	Adpgk	UNKNOWN	31.4657	55.5798			31.4657	1.745	55.5902	341.324
C7	6	Adpgk	UNKNOWN	28.3081	398.893			28.3081	2.60094	398.968	2449.66	2505.86
C8	6	Adpgk	UNKNOWN	28.3469	389.355			28.3469	2.59043	389.428	2391.08
C9	6	Adpgk	UNKNOWN	28.1661	435.884			28.1661	2.63945	435.965	2676.83
C10	7	Adpgk	UNKNOWN	29.6604	171.515			29.6604	2.23438	171.547	1053.3	1314.51
C11	7	Adpgk	UNKNOWN	29.4043	201.243			29.4043	2.3038	201.28	1235.86
C12	7	Adpgk	UNKNOWN	28.937	269.391			28.937	2.43046	269.441	1654.37
D1	8	Adpgk	UNKNOWN	28.4225	371.411			28.4225	2.56994	371.481	2280.89	1941.99
D2	8	Adpgk	UNKNOWN	28.7578	301.27			28.7578	2.47904	301.327	1850.15
D3	8	Adpgk	UNKNOWN	28.8982	275.996			28.8982	2.44098	276.048	1694.93
D4	Input	Adpgk	UNKNOWN	27.8848	519.518			27.8848	2.71568	519.615	3190.44	2872.36
D5	Input	Adpgk	UNKNOWN	27.9361	503.173			27.9361	2.7018	503.268	3090.06
D6	Input	Adpgk	UNKNOWN	28.3839	380.479			28.3839	2.58041	380.55	2336.58
AATF
Well	Sample Name	Target Name	Task	Cт	Quantity	Sample name	Well no.	Mean Ct	log qt calc	calculated quant	Mass aatf - in pg
E1		Aatf	STANDARD	22.9051	10000			22.9051	3.88797	7726.3	47439.5
E2		Aatf	STANDARD	22.861	10000			22.861	3.89894	7923.95	48653
E3		Aatf	STANDARD	23.1441	10000			23.1441	3.82851	6737.73	41369.7
E4		Aatf	STANDARD	23.7586	5000			23.7586	3.67565	4738.64	29095.2
E5		Aatf	STANDARD	23.7638	5000			23.7638	3.67435	4724.46	29008.2
E6		Aatf	STANDARD	23.7483	5000			23.7483	3.67821	4766.62	29267
E7		Aatf	STANDARD	25.9115	1000			25.9115	3.14009	1380.66	8477.23
E8		Aatf	STANDARD	26.0751	1000			26.0751	3.09939	1257.17	7719.01
E9		Aatf	STANDARD	25.9807	1000			25.9807	3.12286	1326.97	8147.62
E10		Aatf	STANDARD	29.6405	100			29.6405	2.21242	163.087	1001.36
E11		Aatf	STANDARD	29.5226	100			29.5226	2.24177	174.488	1071.36
E12		Aatf	STANDARD	29.8582	100			29.8582	2.15828	143.972	883.988
F1		Aatf	STANDARD	35.1651	10			35.1651	0.838075	6.88771	42.2905
F2		Aatf	STANDARD	35.7266	10			35.7266	0.698387	4.99329	30.6588
F3		Aatf	STANDARD	34.7516	10			34.7516	0.940947	8.72866	53.594
F4	9	Aatf	UNKNOWN	30.1014	125.268			30.1014	2.09776	125.246	769.008	849.484
F5	9	Aatf	UNKNOWN	29.7446	153.677			29.7446	2.18653	153.649	943.403
F6	9	Aatf	UNKNOWN	29.9555	136.187			29.9555	2.13406	136.163	836.041
F7	10	Aatf	UNKNOWN	28.0606	403.222			28.0606	2.60545	403.139	2475.27	2556.76
F8	10	Aatf	UNKNOWN	27.9637	426.244			27.9637	2.62957	426.155	2616.59
F9	10	Aatf	UNKNOWN	27.9893	420.023			27.9893	2.62318	419.936	2578.4
F10	11	Aatf	UNKNOWN	29.2872	199.71			29.2872	2.30032	199.672	1225.99	1031.32
F11	11	Aatf	UNKNOWN	29.8549	144.266			29.8549	2.15909	144.24	885.633
F12	11	Aatf	UNKNOWN	29.674	160.022			29.674	2.2041	159.992	982.352
G1	12	Aatf	UNKNOWN	27.342	608.574			27.342	2.78422	608.442	3735.83	3559.49
G2	12	Aatf	UNKNOWN	27.4283	579.216			27.4283	2.76275	579.091	3555.62
G3	12	Aatf	UNKNOWN	27.5131	551.749			27.5131	2.74165	551.63	3387.01
G4	5	Aatf	UNKNOWN	30.72	87.891			30.72	1.94387	87.8762	539.56	567.665
G5	5	Aatf	UNKNOWN	30.3675	107.56			30.3675	2.03158	107.542	660.305
G6	5	Aatf	UNKNOWN	30.8421	81.9565			30.8421	1.91351	81.9428	503.129
G7	6	Aatf	UNKNOWN	28.3753	336.709			28.3753	2.52717	336.641	2066.98	2312.99
G8	6	Aatf	UNKNOWN	28.2057	371.051			28.2057	2.56935	370.976	2277.79
G9	6	Aatf	UNKNOWN	27.9787	422.597			27.9787	2.62584	422.51	2594.21
G10	7	Aatf	UNKNOWN	28.7527	271.244			28.7527	2.43327	271.191	1665.11	1736.38
G11	7	Aatf	UNKNOWN	28.7144	277.261			28.7144	2.4428	277.207	1702.05
G12	7	Aatf	UNKNOWN	28.5765	300.057			28.5765	2.47712	299.997	1841.98
H1	8	Aatf	UNKNOWN	28.4107	329.944			28.4107	2.51835	329.877	2025.45	2076.78
H2	8	Aatf	UNKNOWN	28.2175	368.553			28.2175	2.56641	368.478	2262.45
H3	8	Aatf	UNKNOWN	28.4838	316.423			28.4838	2.50018	316.359	1942.45
H4	Input	Aatf	UNKNOWN	27.4226	581.102			27.4226	2.76416	580.976	3567.19	3442.74
H5	Input	Aatf	UNKNOWN	27.2377	646.025			27.2377	2.81015	645.884	3965.73
H6	Input	Aatf	UNKNOWN	27.8483	455.355			27.8483	2.65826	455.259	2795.29
SUMMARY		Adpgk	Aatf	Aatf/Adpgk	Sample Ratio / INPUT RATIO
WT	9	96.9316	849.484	8.76375	7.31181
	10	270.919	2556.76	9.43736	7.87382
	11	74.2985	1031.32	13.8808	11.5811
	12	444.823	3559.49	8.00203	6.67629
Rag	5	444.823	567.665	1.27616	1.06473
	6	2505.86	2312.99	0.923034	0.77011
	7	1314.51	1736.38	1.32093	1.10209
	8	1941.99	2076.78	1.06941	0.892234
INPUT	INPUT	2872.36	3442.74	1.19857	1
Experiment 2 (2022_0401)
Plate 1
Well	Sample Name	Target Name	Task	Cт	Quantity	Sample name	Well no.	Mean Ct	Log(qty)
A1							1	22.8576	1.35903
A2							2	0
A3		Adpgk	STANDARD	22.7909	10000	STANDARD	3	0
A4		Adpgk	STANDARD	23.7219	5000	STANDARD	4	23.7851	3.69897
A5		Adpgk	STANDARD	23.8367	5000	STANDARD	5	0
A6		Adpgk	STANDARD	23.7966	5000	STANDARD	6	0
A7		Adpgk	STANDARD	25.9409	1000	STANDARD	7	26.0259	3
A8		Adpgk	STANDARD	26.0017	1000	STANDARD	8	0
A9		Adpgk	STANDARD	26.1351	1000	STANDARD	9	0
A10		Adpgk	STANDARD	29.6908	100	STANDARD	10	29.6128	2
A11		Adpgk	STANDARD	29.426	100	STANDARD	11	0
A12		Adpgk	STANDARD	29.7215	100	STANDARD	12	0
B1		Adpgk	STANDARD	34.5813	10	STANDARD	1	34.61	1
B2		Adpgk	STANDARD	34.5056	10	STANDARD	2	0
B3		Adpgk	STANDARD	34.743	10	STANDARD	3	0
B4
B5
B6
B7
B8
B9
B10	r3	Adpgk	UNKNOWN	28.0419	364.822	r3	10	27.9477	1.44635
B11	r3	Adpgk	UNKNOWN	27.9358	388.501	r3	11	0
B12	r3	Adpgk	UNKNOWN	27.8653	405.062	r3	12	0
C1
C2
C3
C4
C5
C6
C7	w7	Adpgk	UNKNOWN	34.4935	7.97806	w7	7	34.6322	1.53948
C8	w7	Adpgk	UNKNOWN	33.7617	12.309	w7	8	0
C9	w7	Adpgk	UNKNOWN	35.6414	4.04135	w7	9	0
C10	w6	Adpgk	UNKNOWN	32.4613	26.5982	w6	10	31.7942	1.50235
C11	w6	Adpgk	UNKNOWN	31.9681	35.6259	w6	11	0
C12	w6	Adpgk	UNKNOWN	30.9533	64.997	w6	12	0
D1	w5	Adpgk	UNKNOWN	34.3058	8.91667	w5	1	35.1115	1.54545
D2	w5	Adpgk	UNKNOWN	34.7826	6.72235	w5	2	0
D3	w5	Adpgk	UNKNOWN	36.2462	2.82423	w5	3	0
D4	Input	Adpgk	UNKNOWN	27.9214	391.828	Input	4	26.4611	1.42261
D5	Input	Adpgk	UNKNOWN	27.4979	503.581	Input	5	0
D6	Input	Adpgk	UNKNOWN	23.9641	4086.93	Input	6	0
D7		Adpgk	STANDARD	22.9243	10000	STANDARD	7
D8		Adpgk	STANDARD	Undetermined	10000	STANDARD	8
D9		Adpgk	STANDARD	Undetermined	10000	STANDARD	9
D10		Adpgk	NTC	Undetermined		NTC	10	#DIV/0!	#DIV/0!
D11		Adpgk	NTC	Undetermined		NTC	11	0
D12		Adpgk	NTC	Undetermined		NTC	12	0
E1		Aatf	STANDARD	22.1591	10000	STANDARD	1	22.1332	4
E2		Aatf	STANDARD	22.115	10000	STANDARD	2	0
E3		Aatf	STANDARD	22.1255	10000	STANDARD	3	0
E4		Aatf	STANDARD	23.0003	5000	STANDARD	4	22.9996	3.69897
E5		Aatf	STANDARD	22.9934	5000	STANDARD	5	0
E6		Aatf	STANDARD	23.0051	5000	STANDARD	6	0
E7		Aatf	STANDARD	25.2345	1000	STANDARD	7	25.2902	3
E8		Aatf	STANDARD	25.2951	1000	STANDARD	8	0
E9		Aatf	STANDARD	25.3408	1000	STANDARD	9	0
E10		Aatf	STANDARD	28.6824	100	STANDARD	10	28.9009	2
E11		Aatf	STANDARD	28.9075	100	STANDARD	11	0
E12		Aatf	STANDARD	29.113	100	STANDARD	12	0
F1		Aatf	STANDARD	33.5859	10	STANDARD	1	33.3356	1
F2		Aatf	STANDARD	33.0318	10	STANDARD	2	0
F3		Aatf	STANDARD	33.3892	10	STANDARD	3	0
F4
F5
F6
F7
F8
F9
F10	r3	Aatf	UNKNOWN	27.9924	222.147	r3	10	27.978	1.44682
F11	r3	Aatf	UNKNOWN	27.9376	229.833	r3	11	0
F12	r3	Aatf	UNKNOWN	28.004	220.557	r3	12	0
G1
G2
G3
G4
G5
G6													Mass genome (pg)	6.14
G7	w7	Aatf	UNKNOWN	30.0773	61.0015	w7	7	30.2602	1.48087		For Adpgk					For Aatf
G8	w7	Aatf	UNKNOWN	30.2868	53.5728	w7	8	0			m	-3.8585				m	-3.7145
G9	w7	Aatf	UNKNOWN	30.4165	49.433	w7	9	0			b	37.95				b	36.709
G10	w6	Aatf	UNKNOWN	26.1885	679.657	w6	10	26.8061	1.42823
G11	w6	Aatf	UNKNOWN	27.9011	235.095	w6	11	0
G12	w6	Aatf	UNKNOWN	26.3286	623.143	w6	12	0
H1	w5	Aatf	UNKNOWN	29.5675	83.6748	w5	1	29.3662	1.46785
H2	w5	Aatf	UNKNOWN	29.6569	79.1668	w5	2	0
H3	w5	Aatf	UNKNOWN	28.8743	128.594	w5	3	0
H4	Input	Aatf	UNKNOWN	26.9142	433.433	Input	4	26.8054	1.42822
H5	Input	Aatf	UNKNOWN	26.7295	486.014	Input	5	0
H6	Input	Aatf	UNKNOWN	26.7725	473.246	Input	6	0
H7		Aatf	NTC	29.562		NTC	7	29.4983	1.4698
H8		Aatf	NTC	29.4286		NTC	8	0
H9		Aatf	NTC	29.5044		NTC	9	0
H10		Aatf	NTC	Undetermined		NTC	10	#DIV/0!	#DIV/0!
H11		Aatf	NTC	Undetermined		NTC	11	0
H12		Aatf	NTC	Undetermined		NTC	12	0
Well	Sample Name	Target Name	Task	Cт	Quantity	Sample name	Well no.	Mean Ct	Log(qty)	Qty - in copy #	Mass adpgk or aatf - in pg
A1					10000	STANDARD	1	22.8576	4	#DIV/0!	#DIV/0!	<adpgk
A4		Adpgk	STANDARD	23.7219	5000	STANDARD	4	23.7851	3.69897	#DIV/0!	#DIV/0!
A7		Adpgk	STANDARD	25.9409	1000	STANDARD	7	26.0259	3	#DIV/0!	#DIV/0!
A10		Adpgk	STANDARD	29.6908	100	STANDARD	10	29.6128	2	#DIV/0!	#DIV/0!
B1		Adpgk	STANDARD	34.5813	10	STANDARD	1	34.61	1	#DIV/0!	#DIV/0!
B10	r3	Adpgk	UNKNOWN	28.0419	364.822	r3	10	27.9477	1.44635	#DIV/0!	#DIV/0!
C7	w7	Adpgk	UNKNOWN	34.4935	7.97806	w7	7	34.6322	1.53948	#DIV/0!	#DIV/0!
C10	w6	Adpgk	UNKNOWN	32.4613	26.5982	w6	10	31.7942	1.50235	#DIV/0!	#DIV/0!
D1	w5	Adpgk	UNKNOWN	34.3058	8.91667	w5	1	35.1115	1.54545	#DIV/0!	#DIV/0!
D4	Input	Adpgk	UNKNOWN	27.9214	391.828	Input	4	26.4611	1.42261	#DIV/0!	#DIV/0!
E1		Aatf	STANDARD	22.1591	10000	STANDARD	1	22.1332	4	#DIV/0!	#DIV/0!	<aatf
E4		Aatf	STANDARD	23.0003	5000	STANDARD	4	22.9996	3.69897	#DIV/0!	#DIV/0!
E7		Aatf	STANDARD	25.2345	1000	STANDARD	7	25.2902	3	#DIV/0!	#DIV/0!
E10		Aatf	STANDARD	28.6824	100	STANDARD	10	28.9009	2	#DIV/0!	#DIV/0!
F1		Aatf	STANDARD	33.5859	10	STANDARD	1	33.3356	1	#DIV/0!	#DIV/0!
F10	r3	Aatf	UNKNOWN	27.9924	222.147	r3	10	27.978	1.44682	#DIV/0!	#DIV/0!
G7	w7	Aatf	UNKNOWN	30.0773	61.0015	w7	7	30.2602	1.48087	#DIV/0!	#DIV/0!
G10	w6	Aatf	UNKNOWN	26.1885	679.657	w6	10	26.8061	1.42823	#DIV/0!	#DIV/0!
H1	w5	Aatf	UNKNOWN	29.5675	83.6748	w5	1	29.3662	1.46785	#DIV/0!	#DIV/0!
H4	Input	Aatf	UNKNOWN	26.9142	433.433	Input	4	26.8054	1.42822	#DIV/0!	#DIV/0!
SUMMARY		Adpgk	Aatf	Aatf/Adpgk	Sample Ratio / INPUT RATIO
Rag	r3	2401.35	1376.21	0.573096	#DIV/0!
WT	w7	44.4669	334.408	7.52037	#DIV/0!
	w6	241.851	2845.71	11.7664	#DIV/0!
	w5	33.4051	582.044	17.4238	#DIV/0!
INPUT	INPUT	5830.63	2846.88	0.488264	#DIV/0!
Plate 2
Well	Sample Name	Target Name	Task	Reporter	Quencher	Cт	Cт Mean	Cт SD	Quantity	Log(CT)
A1
A2
A3												y=mx+b	y=Ct
A4		Adpgk	STANDARD	SYBR	None	21.4258	21.7664	0.298787	10000	4		m	-3.569
A5		Adpgk	STANDARD	SYBR	None	21.9846	21.7664	0.298787	10000	4		b	35.921
A6		Adpgk	STANDARD	SYBR	None	21.8887	21.7664	0.298787	10000	4
A7		Adpgk	STANDARD	SYBR	None	22.8326	22.8626	0.0282958	5000	3.69897
A8		Adpgk	STANDARD	SYBR	None	22.8662	22.8626	0.0282958	5000	3.69897
A9		Adpgk	STANDARD	SYBR	None	22.8889	22.8626	0.0282958	5000	3.69897
A10		Adpgk	STANDARD	SYBR	None	Undetermined	25.1643	0.0851906	1000	3
A11		Adpgk	STANDARD	SYBR	None	25.2246	25.1643	0.0851906	1000	3
A12		Adpgk	STANDARD	SYBR	None	25.1041	25.1643	0.0851906	1000	3
B1		Adpgk	STANDARD	SYBR	None	28.1826	28.1134	0.144161	100	2
B2		Adpgk	STANDARD	SYBR	None	27.9476	28.1134	0.144161	100	2
B3		Adpgk	STANDARD	SYBR	None	28.2098	28.1134	0.144161	100	2
B4		Adpgk	STANDARD	SYBR	None	33.7657	32.7985	0.83768	10	1
B5		Adpgk	STANDARD	SYBR	None	32.3169	32.7985	0.83768	10	1
B6		Adpgk	STANDARD	SYBR	None	32.3127	32.7985	0.83768	10	1
								cal log(Ct)	Cal quantity	cal mass gdna
B7	R1	Adpgk	UNKNOWN	SYBR	None	25.2196	25.3761	#DIV/0!	#DIV/0!	#DIV/0!
B8	R1	Adpgk	UNKNOWN	SYBR	None	25.4652	25.3761	#DIV/0!	#DIV/0!	#DIV/0!
B9	R1	Adpgk	UNKNOWN	SYBR	None	25.4435	25.3761	#DIV/0!	#DIV/0!	#DIV/0!
B10	R2	Adpgk	UNKNOWN	SYBR	None	25.2471	25.2302	#DIV/0!	#DIV/0!	#DIV/0!
B11	R2	Adpgk	UNKNOWN	SYBR	None	25.1288	25.2302	#DIV/0!	#DIV/0!	#DIV/0!
B12	R2	Adpgk	UNKNOWN	SYBR	None	25.3146	25.2302	#DIV/0!	#DIV/0!	#DIV/0!
C1
C2
C3
C4	Rag input	Adpgk	UNKNOWN	SYBR	None	24.7603	25.0054	#DIV/0!	#DIV/0!	#DIV/0!
C5	Rag input	Adpgk	UNKNOWN	SYBR	None	25.0958	25.0054	#DIV/0!	#DIV/0!	#DIV/0!
C6	Rag input	Adpgk	UNKNOWN	SYBR	None	25.16	25.0054	#DIV/0!	#DIV/0!	#DIV/0!
C7
C8
C9
C10
C11
C12
D1	R4	Adpgk	UNKNOWN	SYBR	None	27.7087	27.5546	#DIV/0!	#DIV/0!	#DIV/0!
D2	R4	Adpgk	UNKNOWN	SYBR	None	27.1603	27.5546	#DIV/0!	#DIV/0!	#DIV/0!
D3	R4	Adpgk	UNKNOWN	SYBR	None	27.7946	27.5546	#DIV/0!	#DIV/0!	#DIV/0!
D4
D5
D6
D10
D11
D12												y=mx+b	y=Ct
E1		Aatf	STANDARD	SYBR	None	20.2227	20.0333	0.170745	10000	4		m	-4.1019
E2		Aatf	STANDARD	SYBR	None	19.8911	20.0333	0.170745	10000	4		b	35.899
E3		Aatf	STANDARD	SYBR	None	19.9861	20.0333	0.170745	10000	4
E4		Aatf	STANDARD	SYBR	None	20.9949	20.9378	0.0623735	5000	3.69897
E5		Aatf	STANDARD	SYBR	None	20.9472	20.9378	0.0623735	5000	3.69897
E6		Aatf	STANDARD	SYBR	None	20.8713	20.9378	0.0623735	5000	3.69897
E7		Aatf	STANDARD	SYBR	None	22.7417	23.1151	0.326947	1000	3
E8		Aatf	STANDARD	SYBR	None	23.2539	23.1151	0.326947	1000	3
E9		Aatf	STANDARD	SYBR	None	23.3497	23.1151	0.326947	1000	3
F1		Aatf	STANDARD	SYBR	None	26.507	26.4586	0.0726439	100	2
F2		Aatf	STANDARD	SYBR	None	26.4937	26.4586	0.0726439	100	2
F3		Aatf	STANDARD	SYBR	None	26.375	26.4586	0.0726439	100	2
F4		Aatf	STANDARD	SYBR	None	31.2251	32.7605	3.81002	10	1
F5		Aatf	STANDARD	SYBR	None	37.0987	32.7605	3.81002	10	1
F6		Aatf	STANDARD	SYBR	None	29.9578	32.7605	3.81002	10	1
								cal log(Ct)	Cal quantity	cal mass gdna
F7	R1	Aatf	UNKNOWN	SYBR	None	23.5798	23.7212	#DIV/0!	#DIV/0!	#DIV/0!
F8	R1	Aatf	UNKNOWN	SYBR	None	23.8164	23.7212	#DIV/0!	#DIV/0!	#DIV/0!
F9	R1	Aatf	UNKNOWN	SYBR	None	23.7673	23.7212	#DIV/0!	#DIV/0!	#DIV/0!
F10	R2	Aatf	UNKNOWN	SYBR	None	22.6534	22.6589	#DIV/0!	#DIV/0!	#DIV/0!
F11	R2	Aatf	UNKNOWN	SYBR	None	22.5106	22.6589	#DIV/0!	#DIV/0!	#DIV/0!
F12	R2	Aatf	UNKNOWN	SYBR	None	22.8127	22.6589	#DIV/0!	#DIV/0!	#DIV/0!
G1	R4	Aatf	UNKNOWN	SYBR	None	26.4717	26.6798	#DIV/0!	#DIV/0!	#DIV/0!
G2	R4	Aatf	UNKNOWN	SYBR	None	27.3135	26.6798	#DIV/0!	#DIV/0!	#DIV/0!
G3	R4	Aatf	UNKNOWN	SYBR	None	26.2541	26.6798	#DIV/0!	#DIV/0!	#DIV/0!
G4	Rag input	Aatf	UNKNOWN	SYBR	None	23.2225	23.2051	#DIV/0!	#DIV/0!	#DIV/0!
G5	Rag input	Aatf	UNKNOWN	SYBR	None	23.1606	23.2051	#DIV/0!	#DIV/0!	#DIV/0!
G6	Rag input	Aatf	UNKNOWN	SYBR	None	23.2323	23.2051	#DIV/0!	#DIV/0!	#DIV/0!
G7
G8
G9
G10
G11
G12
H1
H2
H3
H4
H5
H6
H9
H10
H11
SUMMARY		Adpgk	Aatf	Aatf/Adpgk	Sample Ratio / INPUT RATIO
Rag	R1	#DIV/0!	#DIV/0!	#DIV/0!	#DIV/0!
	R2	#DIV/0!	#DIV/0!	#DIV/0!	#DIV/0!
	R4	#DIV/0!	#DIV/0!	#DIV/0!	#DIV/0!
Input	Input	#DIV/0!	#DIV/0!	#DIV/0!	#DIV/0!
Experiment 3 (2022_0517)
Well	Sample Name	Target Name	Task	Reporter	Quencher	Cт	Cт Mean	Cт SD	Quantity	Log(CT)	Plate 1/2 (Adpgk)
A1
A2
A3												y=mx+b	y=Ct
A4		Adpgk	STANDARD	SYBR	None	22.4833	22.4573	0.0405012	10000	4		m	-4.1721
A5		Adpgk	STANDARD	SYBR	None	22.478	22.4573	0.0405012	10000	4		b	38.634
A6		Adpgk	STANDARD	SYBR	None	22.4106	22.4573	0.0405012	10000	4
A7		Adpgk	STANDARD	SYBR	None	23.2346	23.2911	0.050386	5000	3.69897
A8		Adpgk	STANDARD	SYBR	None	23.3069	23.2911	0.050386	5000	3.69897
A9		Adpgk	STANDARD	SYBR	None	23.3316	23.2911	0.050386	5000	3.69897
A10		Adpgk	STANDARD	SYBR	None	25.6823	25.694	0.0822465	1000	3
A11		Adpgk	STANDARD	SYBR	None	25.6183	25.694	0.0822465	1000	3
A12		Adpgk	STANDARD	SYBR	None	25.7815	25.694	0.0822465	1000	3
B1		Adpgk	STANDARD	SYBR	None	29.3108	29.3575	0.105818	100	2
B2		Adpgk	STANDARD	SYBR	None	29.2831	29.3575	0.105818	100	2
B3		Adpgk	STANDARD	SYBR	None	29.4787	29.3575	0.105818	100	2
B4		Adpgk	STANDARD	SYBR	None	34.0406	35.2148	1.56364	10	1
B5		Adpgk	STANDARD	SYBR	None	36.9898	35.2148	1.56364	10	1
B6		Adpgk	STANDARD	SYBR	None	34.6141	35.2148	1.56364	10	1
								cal log(Ct)	Cal quantity	cal mass gdna
B7	Rag1	Adpgk	UNKNOWN	SYBR	None	28.5163	28.5518	#DIV/0!	#DIV/0!	#DIV/0!
B8	Rag1	Adpgk	UNKNOWN	SYBR	None	28.5607	28.5518	#DIV/0!	#DIV/0!	#DIV/0!
B9	Rag1	Adpgk	UNKNOWN	SYBR	None	28.5785	28.5518	#DIV/0!	#DIV/0!	#DIV/0!
B10	R2	Adpgk	UNKNOWN	SYBR	None	27.916	28.1029	#DIV/0!	#DIV/0!	#DIV/0!
B11	R2	Adpgk	UNKNOWN	SYBR	None	28.331	28.1029	#DIV/0!	#DIV/0!	#DIV/0!
B12	R2	Adpgk	UNKNOWN	SYBR	None	28.0617	28.1029	#DIV/0!	#DIV/0!	#DIV/0!
C1	R3	Adpgk	UNKNOWN	SYBR	None	27.2944	27.3427	#DIV/0!	#DIV/0!	#DIV/0!
C2	R3	Adpgk	UNKNOWN	SYBR	None	27.2918	27.3427	#DIV/0!	#DIV/0!	#DIV/0!
C3	R3	Adpgk	UNKNOWN	SYBR	None	27.442	27.3427	#DIV/0!	#DIV/0!	#DIV/0!
C4	R4	Adpgk	UNKNOWN	SYBR	None	30.0774	30.1111	#DIV/0!	#DIV/0!	#DIV/0!
C5	R4	Adpgk	UNKNOWN	SYBR	None	29.7124	30.1111	#DIV/0!	#DIV/0!	#DIV/0!
C6	R4	Adpgk	UNKNOWN	SYBR	None	30.5434	30.1111	#DIV/0!	#DIV/0!	#DIV/0!
C7	R5	Adpgk	UNKNOWN	SYBR	None	29.0531	29.0491	#DIV/0!	#DIV/0!	#DIV/0!
C8	R5	Adpgk	UNKNOWN	SYBR	None	29.1523	29.0491	#DIV/0!	#DIV/0!	#DIV/0!
C9	R5	Adpgk	UNKNOWN	SYBR	None	28.9419	29.0491	#DIV/0!	#DIV/0!	#DIV/0!
E1	WT1	Adpgk	UNKNOWN	SYBR	None	32.7054	32.8073	#DIV/0!	#DIV/0!	#DIV/0!
E2	WT1	Adpgk	UNKNOWN	SYBR	None	32.0191	32.8073	#DIV/0!	#DIV/0!	#DIV/0!
E3	WT1	Adpgk	UNKNOWN	SYBR	None	33.6973	32.8073	#DIV/0!	#DIV/0!	#DIV/0!
E4	W2	Adpgk	UNKNOWN	SYBR	None	29.3536	29.4111	#DIV/0!	#DIV/0!	#DIV/0!
E5	W2	Adpgk	UNKNOWN	SYBR	None	29.4558	29.4111	#DIV/0!	#DIV/0!	#DIV/0!
E6	W2	Adpgk	UNKNOWN	SYBR	None	29.4239	29.4111	#DIV/0!	#DIV/0!	#DIV/0!
E7
E8
E9
E10	W4	Adpgk	UNKNOWN	SYBR	None	30.6026	30.5527	#DIV/0!	#DIV/0!	#DIV/0!
E11	W4	Adpgk	UNKNOWN	SYBR	None	30.6408	30.5527	#DIV/0!	#DIV/0!	#DIV/0!
E12	W4	Adpgk	UNKNOWN	SYBR	None	30.4146	30.5527	#DIV/0!	#DIV/0!	#DIV/0!
F1
F2
F3
F4
F5
F6
F7	Input	Adpgk	UNKNOWN	SYBR	None	27.9014	27.9982	#DIV/0!	#DIV/0!	#DIV/0!
F8	Input	Adpgk	UNKNOWN	SYBR	None	27.8677	27.9982	#DIV/0!	#DIV/0!	#DIV/0!
F9	Input	Adpgk	UNKNOWN	SYBR	None	28.2256	27.9982	#DIV/0!	#DIV/0!	#DIV/0!
Well	Sample Name	Target Name	Task	Reporter	Quencher	Cт	Cт Mean	Cт SD	Quantity	Log(CT)	Plate 2/2 (Aatf)
A1
A2
A3												y=mx+b	y=Ct
A4		Aatf	STANDARD	SYBR	None	22.9128	22.8806	0.0497992	10000	4		m	-3.9393
A5		Aatf	STANDARD	SYBR	None	22.9058	22.8806	0.0497992	10000	4		b	38.195
A6		Aatf	STANDARD	SYBR	None	22.8233	22.8806	0.0497992	10000	4
A7		Aatf	STANDARD	SYBR	None	23.6422	23.6917	0.0738279	5000	3.69897
A8		Aatf	STANDARD	SYBR	None	23.6563	23.6917	0.0738279	5000	3.69897
A9		Aatf	STANDARD	SYBR	None	23.7765	23.6917	0.0738279	5000	3.69897
A10		Aatf	STANDARD	SYBR	None	25.8714	25.916	0.0387685	1000	3
A11		Aatf	STANDARD	SYBR	None	25.9414	25.916	0.0387685	1000	3
A12		Aatf	STANDARD	SYBR	None	25.9353	25.916	0.0387685	1000	3
B1		Aatf	STANDARD	SYBR	None	29.4803	29.7264	0.240426	100	2
B2		Aatf	STANDARD	SYBR	None	29.9607	29.7264	0.240426	100	2
B3		Aatf	STANDARD	SYBR	None	29.7384	29.7264	0.240426	100	2
B4		Aatf	STANDARD	SYBR	None	34.4947	34.7958	0.575902	10	1
B5		Aatf	STANDARD	SYBR	None	34.433	34.7958	0.575902	10	1
B6		Aatf	STANDARD	SYBR	None	35.4599	34.7958	0.575902	10	1
								cal log(Ct)	Cal quantity	cal mass gdna
B7	Rag1	Aatf	UNKNOWN	SYBR	None	28.4359	28.501	#DIV/0!	#DIV/0!	#DIV/0!
B8	Rag1	Aatf	UNKNOWN	SYBR	None	28.4732	28.501	#DIV/0!	#DIV/0!	#DIV/0!
B9	Rag1	Aatf	UNKNOWN	SYBR	None	28.594	28.501	#DIV/0!	#DIV/0!	#DIV/0!
B10	R2	Aatf	UNKNOWN	SYBR	None	27.7109	27.7562	#DIV/0!	#DIV/0!	#DIV/0!
B11	R2	Aatf	UNKNOWN	SYBR	None	27.8276	27.7562	#DIV/0!	#DIV/0!	#DIV/0!
B12	R2	Aatf	UNKNOWN	SYBR	None	27.73	27.7562	#DIV/0!	#DIV/0!	#DIV/0!
C1	R3	Aatf	UNKNOWN	SYBR	None	27.7216	27.4236	#DIV/0!	#DIV/0!	#DIV/0!
C2	R3	Aatf	UNKNOWN	SYBR	None	27.2825	27.4236	#DIV/0!	#DIV/0!	#DIV/0!
C3	R3	Aatf	UNKNOWN	SYBR	None	27.2666	27.4236	#DIV/0!	#DIV/0!	#DIV/0!
C4	R4	Aatf	UNKNOWN	SYBR	None	29.71	29.8425	#DIV/0!	#DIV/0!	#DIV/0!
C5	R4	Aatf	UNKNOWN	SYBR	None	29.8076	29.8425	#DIV/0!	#DIV/0!	#DIV/0!
C6	R4	Aatf	UNKNOWN	SYBR	None	30.0099	29.8425	#DIV/0!	#DIV/0!	#DIV/0!
C7	R5	Aatf	UNKNOWN	SYBR	None	28.4462	28.4112	#DIV/0!	#DIV/0!	#DIV/0!
C8	R5	Aatf	UNKNOWN	SYBR	None	28.3276	28.4112	#DIV/0!	#DIV/0!	#DIV/0!
C9	R5	Aatf	UNKNOWN	SYBR	None	28.4599	28.4112	#DIV/0!	#DIV/0!	#DIV/0!
G3	WT1	Aatf	UNKNOWN	SYBR	None	28.954	28.9639	#DIV/0!	#DIV/0!	#DIV/0!
E1	WT1	Aatf	UNKNOWN	SYBR	None	29.1106	28.9639	#DIV/0!	#DIV/0!	#DIV/0!
E2	WT1	Aatf	UNKNOWN	SYBR	None	28.8271	28.9639	#DIV/0!	#DIV/0!	#DIV/0!
E3
E4	W2	Aatf	UNKNOWN	SYBR	None	27.6446	27.6833	#DIV/0!	#DIV/0!	#DIV/0!
E5	W2	Aatf	UNKNOWN	SYBR	None	27.9025	27.6833	#DIV/0!	#DIV/0!	#DIV/0!
E6	W2	Aatf	UNKNOWN	SYBR	None	27.5028	27.6833	#DIV/0!	#DIV/0!	#DIV/0!
E7
E8
E9
E10	W4	Aatf	UNKNOWN	SYBR	None	27.8273	27.82	#DIV/0!	#DIV/0!	#DIV/0!
E11	W4	Aatf	UNKNOWN	SYBR	None	27.8572	27.82	#DIV/0!	#DIV/0!	#DIV/0!
E12	W4	Aatf	UNKNOWN	SYBR	None	27.7756	27.82	#DIV/0!	#DIV/0!	#DIV/0!
F1
F2
F3
F4	Input	Aatf	UNKNOWN	SYBR	None	27.9952	27.9911	#DIV/0!	#DIV/0!	#DIV/0!
F5	Input	Aatf	UNKNOWN	SYBR	None	28.0005	27.9911	#DIV/0!	#DIV/0!	#DIV/0!
F6	Input	Aatf	UNKNOWN	SYBR	None	27.9775	27.9911	#DIV/0!	#DIV/0!	#DIV/0!
F10		Aatf	NTC	SYBR	None	32.6722		#DIV/0!	#DIV/0!	#DIV/0!
F11		Aatf	NTC	SYBR	None	32.1836		#DIV/0!	#DIV/0!	#DIV/0!
F12		Aatf	NTC	SYBR	None	32.1749		#DIV/0!	#DIV/0!	#DIV/0!
Summary		Adpgk	Aatf	Aatf/Adpgk	Sample Ratio / INPUT RATIO
Rag	1	#DIV/0!	#DIV/0!	#DIV/0!	#DIV/0!
	2	#DIV/0!	#DIV/0!	#DIV/0!	#DIV/0!
	3	#DIV/0!	#DIV/0!	#DIV/0!	#DIV/0!
	4	#DIV/0!	#DIV/0!	#DIV/0!	#DIV/0!
	5	#DIV/0!	#DIV/0!	#DIV/0!	#DIV/0!
WT	1	#DIV/0!	#DIV/0!	#DIV/0!	#DIV/0!
	2	#DIV/0!	#DIV/0!	#DIV/0!	#DIV/0!
	4	#DIV/0!	#DIV/0!	#DIV/0!	#DIV/0!
Input	Input	#DIV/0!	#DIV/0!	#DIV/0!	#DIV/0!
