# Supplementary material for: Decoupled neoantigen cross-presentation by dendritic cells limits anti-tumor immunity against tumors with heterogeneous neoantigen expression
Source: eLife. 2023 Aug 7;12:e85263. doi: 10.7554/eLife.85263 (PMC10425174; doi:10.7554/eLife.85263)
Supplement: Figure 2—figure supplement 2—source data 1. [file elife-85263-fig2-figsupp2-data1.xlsx]

## Sheet: Sheet1
Supplemental Figure 3A			Day 7			Day 10			Day 14
Experiment 1 (2020_0711)
			SAMPLE: KP-Cpne1
BACKGROUND (MEDIA)			10	11	12	13	14	15	16	17	18
		replicate 1	5	8	21	0	2	0	2	4	0
		replicate 2	5	19	25	0	1	5	6	5	0
		BACKGROUND AVERAGE	5	13.5	23	0	1.5	2.5	4	4.5	0
SAMPLE			10	11	12	13	14	15	16	17	18
		replicate 1	2	6	11	34	5	0	54	0	13
		replicate 2	1	11	15	46	0	0	38	6	20
		BACKGROUND AVERAGE	5	13.5	23	0	1.5	2.5	4	4.5	0
		AVERAGE replicate - BACKGROUND AVERAGE	-3.5	-5	-10	40	1	-2.5	42	-1.5	16.5	<PLOTTED VALUES
			SAMPLE: KP-HetHigh
BACKGROUND (MEDIA)			19	20	21	22	23	24	25	26	27
		replicate 1	25	16	20	13	9	256	7	2	1
		replicate 2	22	20	28	6	13	245	5	0	1
		BACKGROUND AVERAGE	23.5	18	24	9.5	11	250.5	6	1	1
SAMPLE			19	20	21	22	23	24	25	26	27
		replicate 1	12	11	22	2	12	91	6	11	2
		replicate 2	14	13	27	4	12	68	11	14	4
		BACKGROUND AVERAGE	23.5	18	24	9.5	11	250.5	6	1	1
		AVERAGE replicate - BACKGROUND AVERAGE	-10.5	-6	0.5	-6.5	1	-171	2.5	11.5	2	<PLOTTED VALUES
			SAMPLE: KP-HetLow
BACKGROUND (MEDIA)			28	29	30	31	32	33	34	35	36
		replicate 1	28	138	12	13	16	6	1	8	6
		replicate 2	27	60	13	9	16	6	7	12	13
		BACKGROUND AVERAGE	27.5	99	12.5	11	16	6	4	10	9.5
SAMPLE			28	29	30	31	32	33	34	35	36
		replicate 1	19	60	9	411	134	415	221	267	580
		replicate 2	15	61	14	399	131	405	169	231	560
		BACKGROUND AVERAGE	27.5	99	12.5	11	16	6	4	10	9.5
		AVERAGE replicate - BACKGROUND AVERAGE	-10.5	-38.5	-1	394	116.5	404	191	239	560.5	<PLOTTED VALUES
Experiment 2 (2021_0629)
			SAMPLE: KP-HetHigh
BACKGROUND (MEDIA)			1	2	3	4	5	6	7	8	9
		replicate 1	1	0	0	0	0	3	0	0	0
		replicate 2	1	8	0	0	0	0	44	0	1
		BACKGROUND AVERAGE	1	4	0	0	0	1.5	22	0	0.5
SAMPLE			1	2	3	4	5	6	7	8	9
		replicate 1	0	0	0	0	0	1	146	0	10
		replicate 2	1	11	0	0	3	4	114	1	9
		BACKGROUND AVERAGE	1	4	0	0	0	1.5	22	0	0.5
		AVERAGE replicate - BACKGROUND AVERAGE	-0.5	1.5	0	0	1.5	1	108	0.5	9	<PLOTTED VALUES
			SAMPLE: KP-HetLow
BACKGROUND (MEDIA)			10	11	12	13	14	15	16	17	18
		replicate 1	0			5	0	6	4	0	13
		replicate 2	1	1	5	5	1	5	15	1	15
		replicate 3	0
		BACKGROUND AVERAGE	0.333333	1	5	5	0.5	5.5	9.5	0.5	14
SAMPLE			10	11	12	13	14	15	16	17	18
		replicate 1	56	86	88	201	106	300	114	28	158
		replicate 2	64	50	101	193	78	274	118	13	173
		BACKGROUND AVERAGE	0.333333	1	5	5	0.5	5.5	9.5	0.5	14
		AVERAGE replicate - BACKGROUND AVERAGE	59.6667	67	89.5	192	91.5	281.5	106.5	20	151.5	<PLOTTED VALUES
			SAMPLE: KP-Cpne1
BACKGROUND (MEDIA)			19	20	21	22	23	24	25	26	27
		replicate 1	0	0	0	1	1	4	0	0	0
		replicate 2	0	3	3	4	4	1	0	0	0
		BACKGROUND AVERAGE	0	1.5	1.5	2.5	2.5	2.5	0	0	0
SAMPLE			19	20	21	22	23	24	25	26	27
		replicate 1	38	0	16	40	5	5	0	0	8
		replicate 2	29	1	11	34	25	6	1	1	10
		BACKGROUND AVERAGE	0	1.5	1.5	2.5	2.5	2.5	0	0	0
		AVERAGE replicate - BACKGROUND AVERAGE	33.5	-1	12	34.5	12.5	3	0.5	0.5	9	<PLOTTED VALUES
Supplemental Figure 3B			Day 7			Day 10			Day 14
Experiment 1 (2020_0711)
			SAMPLE: KP-Adpgk
BACKGROUND (MEDIA)			1	2	3	4	5	6	7	8	9
		replicate 1	15	28	14	85	1	0	8	0	2
		replicate 2	16	28	20	69	4	0	2	0	9
		BACKGROUND AVERAGE	15.5	28	17	77	2.5	0	5	0	5.5
SAMPLE			1	2	3	4	5	6	7	8	9
		replicate 1	16	75	9	588	478	501	439	151	234
		replicate 2	9	75	13	619	507	536	471	226	380
		BACKGROUND AVERAGE	15.5	28	17	77	2.5	0	5	0	5.5
		AVERAGE replicate - BACKGROUND AVERAGE	-3	47	-6	526.5	490	518.5	450	188.5	301.5	<PLOTTED VALUES
			SAMPLE: KP-HetHigh
BACKGROUND (MEDIA)			19	20	21	22	23	24	25	26	27
		replicate 1	25	16	20	13	9	256	7	2	1
		replicate 2	22	20	28	6	13	245	5	0	1
		BACKGROUND AVERAGE	23.5	18	24	9.5	11	250.5	6	1	1
SAMPLE			19	20	21	22	23	24	25	26	27
		replicate 1	19	2	31	428	581	472	472	442	686
		replicate 2	24	11	16	455	262	485	432	473	616
		BACKGROUND AVERAGE	23.5	18	24	9.5	11	250.5	6	1	1
		AVERAGE replicate - BACKGROUND AVERAGE	-2	-11.5	-0.5	432	410.5	228	446	456.5	650	<PLOTTED VALUES
			SAMPLE: KP-HetLow
BACKGROUND (MEDIA)			28	29	30	31	32	33	34	35	36
		replicate 1	28	138	12	13	16	6	1	8	6
		replicate 2	27	60	13	9	16	6	7	12	13
		BACKGROUND AVERAGE	27.5	99	12.5	11	16	6	4	10	9.5
SAMPLE			28	29	30	31	32	33	34	35	36
		replicate 1	14	88	106	333	604	553	501	498	541
		replicate 2	21	105	119	312	688	576	474	484	575
		BACKGROUND AVERAGE	27.5	99	12.5	11	16	6	4	10	9.5
		AVERAGE replicate - BACKGROUND AVERAGE	-10	-2.5	100	311.5	630	558.5	483.5	481	548.5	<PLOTTED VALUES
Experiment 2 (2021_0629)
			SAMPLE: KP-HetHigh
BACKGROUND (MEDIA)			1	2	3	4	5	6	7	8	9
		replicate 1	1	0	0	0	0	3	0	0	0
		replicate 2	1	8	0	0	0	0	44	0	1
		BACKGROUND AVERAGE	1	4	0	0	0	1.5	22	0	0.5
SAMPLE			1	2	3	4	5	6	7	8	9
		replicate 1	228	79	0	10	65	374	40	13	488
		replicate 2	271	46	0	14	83	413	46	9	624
		BACKGROUND AVERAGE	1	4	0	0	0	1.5	22	0	0.5
		AVERAGE replicate - BACKGROUND AVERAGE	248.5	58.5	0	12	74	392	21	11	555.5	<PLOTTED VALUES
			SAMPLE: KP-HetLow
BACKGROUND (MEDIA)			10	11	12	13	14	15	16	17	18
		replicate 1	0			5	0	6	4	0	13
		replicate 2	1	1	5	5	1	5	15	1	15
		replicate 3	1
		BACKGROUND AVERAGE	0.666667	1	5	5	0.5	5.5	9.5	0.5	14
SAMPLE			10	11	12	13	14	15	16	17	18
		replicate 1	383	508	76	156	501	408	91	43	190
		replicate 2	393	530	94	148	481	439	84	39	188
		BACKGROUND AVERAGE	0.666667	1	5	5	0.5	5.5	9.5	0.5	14
		AVERAGE replicate - BACKGROUND AVERAGE	387.333	518	80	147	490.5	418	78	40.5	175	<PLOTTED VALUES
			SAMPLE: KP-Adpgk
BACKGROUND (MEDIA)			28	29	30	31	32	33	34	35	36
		replicate 1	3	1	1	0	6	6	0	1	4
		replicate 2	1	0	0	0	4	6	1	3	3
		BACKGROUND AVERAGE	2	0.5	0.5	0	5	6	0.5	2	3.5
SAMPLE			28	29	30	31	32	33	34	35	36
		replicate 1	408	10	28	351	38	216	44	216	253
		replicate 2	480	9	24	276	54	221	26	166	198
		BACKGROUND AVERAGE	2	0.5	0.5	0	5	6	0.5	2	3.5
		AVERAGE replicate - BACKGROUND AVERAGE	442	9	25.5	313.5	41	212.5	34.5	189	222	<PLOTTED VALUES
