# Supplementary material for: Decoupled neoantigen cross-presentation by dendritic cells limits anti-tumor immunity against tumors with heterogeneous neoantigen expression
Source: eLife. 2023 Aug 7;12:e85263. doi: 10.7554/eLife.85263 (PMC10425174; doi:10.7554/eLife.85263)
Supplement: Figure 2—figure supplement 3—source data 1. [file elife-85263-fig2-figsupp3-data1.xlsx]

## Sheet: Sheet1
Supplemental Figure 4
Experiment 1 (2022_0615)			Day 7			Day 10			Day 14
			SAMPLE: KP-Aatf
BACKGROUND (MEDIA)			1	2	3	4	5	6	7	8	9
		replicate 1	11	58	33	4	7	2	7	6	12
		replicate 2	1	1	13	1	0	0	5	0	8
		BACKGROUND AVERAGE	6	29.5	23	2.5	3.5	1	6	3	10
SAMPLE			1	2	3	4	5	6	7	8	9
		replicate 1	6	40	14	40	31	569	82	419	258
		replicate 2	6	26	14	45	11	602	61	442	262
		BACKGROUND AVERAGE	6	29.5	23	2.5	3.5	1	6	3	10
		AVERAGE replicate - BACKGROUND AVERAGE	0	3.5	-9	40	17.5	584.5	65.5	427.5	250	<PLOTTED VALUES
			SAMPLE: KP-HetLow(Aatf-Cpne1)
BACKGROUND (MEDIA)			10	11	12	13	14	15	16	17	18
		replicate 1	82	109	65	4	1	1	2	2	0
		replicate 2	34	69	18	12	0	1	0	2	1
		BACKGROUND AVERAGE	58	89	41.5	8	0.5	1	1	2	0.5
SAMPLE			10	11	12	13	14	15	16	17	18
		replicate 1	33	56	16	18	1	45	288	19	12
		replicate 2	39	73	38	14	0	21	292	18	15
		BACKGROUND AVERAGE	58	89	41.5	8	0.5	1	1	2	0.5
		AVERAGE replicate - BACKGROUND AVERAGE	-22	-24.5	-14.5	8	0	32	289	16.5	13	<PLOTTED VALUES
			SAMPLE: KP-HetLow(Adpgk-Aatf)
BACKGROUND (MEDIA)			46	47	48	49	50	51	52	53	54
		replicate 1	122	111	35	0	0	7	0	4	4
		replicate 2	136	109	24	2	1	15	1	9	6
		BACKGROUND AVERAGE	129	110	29.5	1	0.5	11	0.5	6.5	5
SAMPLE			46	47	48	49	50	51	52	53	54
		replicate 1	138	381	89	7	173	625	18	79	69
		replicate 2	172	352	85	1	214	682	24	98	52
		BACKGROUND AVERAGE	129	110	29.5	1	0.5	11	0.5	6.5	5
		AVERAGE replicate - BACKGROUND AVERAGE	26	256.5	57.5	3	193	642.5	20.5	82	55.5	<PLOTTED VALUES
						100	2757.14	<PLOTTED VALUES
						#49 - 40K plated		33.3333	x factor	*Note: sample #49 and 50, fewer than 1e6 splenocytes were plated compared to the rest of the plate. The values were corrected by the dilution factor.
						#50 - 70K plated		14.2857	x factor
Experiment 2 (2022_0714)			Day 7			Day 10			Day 14
			SAMPLE: KP-Aatf
BACKGROUND (MEDIA)			1	2	3	4	5	6	7	8	9
		replicate 1	1	4	5	0	1	1	0	0	1
		replicate 2	1	1	4	0	5	5	2	0	0
		BACKGROUND AVERAGE	1	2.5	4.5	0	3	3	1	0	0.5
SAMPLE			1	2	3	4	5	6	7	8	9
		replicate 1	0	58	13	15	2	145	54	115	45
		replicate 2	0	95	18	9	2	186	85	161	41
		Replicate average	0	76.5	15.5	12	2	165.5	69.5	138	43
		AVERAGE replicate - BACKGROUND AVERAGE	-1	74	11	12	-1	162.5	68.5	138	42.5	<PLOTTED VALUES
			SAMPLE: KP-HetLow(Aatf-Cpne1)
BACKGROUND (MEDIA)			28	29	30	31	32	33	34	35	36
		replicate 1	22	6	31	0	7	11	11	1	31
		replicate 2	11	7	32	1	0	2	9	5	32
		BACKGROUND AVERAGE	16.5	6.5	31.5	0.5	3.5	6.5	10	3	31.5
SAMPLE			28	29	30	31	32	33	34	35	36
		replicate 1	7	14	27	0	18	26	22	8	12
		replicate 2	9	15	39	0	34	22	45	2	22
		Replicate average	8	14.5	33	0	26	24	33.5	5	17
		AVERAGE replicate - BACKGROUND AVERAGE	-8.5	8	1.5	-0.5	22.5	17.5	23.5	2	-14.5	<PLOTTED VALUES
			SAMPLE: KP-HetLow(Adpgk-Aatf)
BACKGROUND (MEDIA)			46	47	48	49	50	51	52	53	54
		replicate 1	5	44	9	19	2	4	4	4	2
		replicate 2	6	69	12	20	4	6	6	7	1
		BACKGROUND AVERAGE	5.5	56.5	10.5	19.5	3	5	5	5.5	1.5
SAMPLE			46	47	48	49	50	51	52	53	54
		replicate 1	226	547	251	262	35	471	87	232	139
		replicate 2	39	575	261	301	36	561	100	253	134
		Replicate average	132.5	561	256	281.5	35.5	516	93.5	242.5	136.5
		AVERAGE replicate - BACKGROUND AVERAGE	127	504.5	245.5	262	32.5	511	88.5	237	135	<PLOTTED VALUES
