# Supplementary material for: Decoupled neoantigen cross-presentation by dendritic cells limits anti-tumor immunity against tumors with heterogeneous neoantigen expression
Source: eLife. 2023 Aug 7;12:e85263. doi: 10.7554/eLife.85263 (PMC10425174; doi:10.7554/eLife.85263)
Supplement: Figure 2—source data 1. [file elife-85263-fig2-data1.xlsx]

## Sheet: Sheet1
Figure 2A
Schematic
Figure 2B
Experiment 1 (2019_0917)
RagKO												Wild-type
KP-HetHigh												KP-HetHigh
Date	Day	L1	W1	L2	W2	L3	W3	A1	A2	A3		Date	Day	L1	W1	L2	W2	L3	W3	A1	A2	A3
	6	5.59	4.63	5.59	4.69	5.65	4.95	25.8817	26.2171	27.9675			6	5.38	4.9	6.6	4.7	5.45	4.58	26.362	31.02	24.961
	8	6.42	4.6	6.67	5.59	6.39	4.69	29.532	37.2853	29.9691			8	6.08	6.35	7.2	5.88	8.25	6.26	38.608	42.336	51.645
	10	6.4	6	6.64	6.33	7.07	5.67	38.4	42.0312	40.0869			10	8.37	6.43	6.45	6.32	6.66	5.64	53.8191	40.764	37.5624
	13	7.15	6.05	6.58	6.11	7.13	6.53	43.2575	40.2038	46.5589			13	7.45	5.96	8.89	7.21	7.95	6.34	44.402	64.0969	50.403
	15	8.42	7.02	8.08	7.42	8.09	6.9	59.1084	59.9536	55.821			15	8.01	6.76	7.62	6.44	8.32	7	54.1476	49.0728	58.24
	17	9.1	7.5	8.7	8	8.6	7.5	68.25	69.6	64.5			17	7.2	7	9.9	7.6	8.7	7.2	50.4	75.24	62.64
	19	9.27	8.6	8.85	8.18	9.09	8.66	79.722	72.393	78.7194			19	8.86	7.28	10.39	8.52	8.63	7.55	64.5008	88.5228	65.1565
	21	9.2	8.49	9.17	9.37	10.15	8.73	78.108	85.9229	88.6095			21	10.88	9.04	8.01	8.88	9.37	7	98.3552	71.1288	65.59
	23	10.59	10.41	10.63	9.52	10.1	8.65	110.242	101.198	87.365			23	9.36	8.73	12	10	10.24	8.55	81.7128	120	87.552
KP-HetLow												KP-HetLow
Date	Day	L1	W1	L2	W2	L3	W3	A1	A2	A3		Date	Day	L1	W1	L2	W2	L3	W3	A1	A2	A3
	6	5.63	5.46	5.4	5.26	4.8	4.51	30.7398	28.404	21.648			6	5.5	4.86	5.51	4.33	5.86	4.93	26.73	23.8583	28.8898
	8	5.51	4.48	5.27	4.97	5.97	4.99	24.6848	26.1919	29.7903			8	5.94	5.44	5.69	4.84	4.14	6.06	32.3136	27.5396	25.0884
	10	6.05	5.32	6.53	5.55	6.12	5.43	32.186	36.2415	33.2316			10	4.28	5.48	5.23	4.37	5.4	4.69	23.4544	22.8551	25.326
	13	6.75	6.33	7.54	6.92	7.79	6.7	42.7275	52.1768	52.193			13	4.34	3.79	5.08	3.93	5.29	4.32	16.4486	19.9644	22.8528
	15	6.8	6.36	7.52	6.84	7.21	6.54	43.248	51.4368	47.1534			15	4.11	3.99	3.99	3.53	4.29	3.88	16.3989	14.0847	16.6452
	17	8.6	7.2	7.3	7	8.1	7	61.92	51.1	56.7			17	3.3	3.3	2.9	2.5	3.7	3.5	10.89	7.25	12.95
	19	8.66	7.87	9.13	7.95	7.94	8.1	68.1542	72.5835	64.314			19	4.08	3.35	2.2	1.8	0	0	13.668	3.96	0
	21	8.72	8.2	8.81	9.44	9.5	8.48	71.504	83.1664	80.56			21	0	0	0	0	3.3	4.01	0	0	13.233
	23	10.78	9.67	9.97	8.55	9.27	9.28	104.243	85.2435	86.0256			23	0	0	0	0	3.7	4.28	0	0	15.836
Experiment 2 (2021_0706)
RagKO												Wild-type
KP-HetHigh		4500		4501		4447						KP-HetHigh
	Day	L1	W1	L2	W2	L3	W3	A1	A2	A3		Date	Day	L1	W1	L2	W2	L3	W3	L4	W4	L5	W5	A1	A2	A3	A4	A5
2023-07-12	6	4.63	4.03	5.18	3.66	4.88	5.14	18.6589	18.9588	25.0832		2021-07-12	6	8.04	4.1	6.09	4.85	4	4.16	4.5	5.71	4.86	4.54	32.964	29.5365	16.64	25.695	22.0644
2023-07-14	8	5.51	4.32	5.73	4.27	6.11	5.94	23.8032	24.4671	36.2934		2021-07-14	8	9.65	4.34	6.15	4.43	4.82	4.11	6.29	4.77	5.33	4.03	41.881	27.2445	19.8102	30.0033	21.4799
2023-07-16	10	5.69	4.44	6.08	4.49	5.76	5.95	25.2636	27.2992	34.272		2021-07-16	10	9.52	4.6	6.32	4.5	4.1	4.62	6.49	4.87	4.22	5.06	43.792	28.44	18.942	31.6063	21.3532
2023-07-19	13	7.03	5.42	6.9	5.47	7.19	7.95	38.1026	37.743	57.1605		2021-07-19	13	9.86	4.54	6.33	5.2	4.49	4.62	6.72	5.48	4.8	4.92	44.7644	32.916	20.7438	36.8256	23.616
2023-07-21	15	7.75	6.13	7.56	6.26	9.24	8.96	47.5075	47.3256	82.7904		2021-07-21	15	11.1	5.16	7.33	5.57	5.22	4.82	7.68	5.62	5.6	5.62	57.276	40.8281	25.1604	43.1616	31.472
2023-07-23	17	8.28	6.43	7.92	6.84	11.59	9.22	53.2404	54.1728	106.86		2021-07-23	17	11.64	5.45	7.54	6.1	5.74	5.46	7.02	5.85	5.59	5.43	63.438	45.994	31.3404	41.067	30.3537
2023-07-26	20	9.05	8.13	8.86	8.16	14.81	10.16	73.5765	72.2976	150.47		2021-07-26	20	12.38	6.31	8.85	6.97	6.7	6.61	7.73	6.7	5.98	5.55	78.1178	61.6845	44.287	51.791	33.189
2023-07-28	22	9.46	8.3	9.23	8.7	14.14	10.34	78.518	80.301	146.208		2021-07-28	22	13.34	6.46	9.58	7.47	6.75	7.06	8.51	7.14	6.96	5.76	86.1764	71.5626	47.655	60.7614	40.0896
2023-07-30	24	10.94	8.66	10.66	9.29	15.35	11.14	94.7404	99.0314	170.999		2021-07-30	24	13.34	7.28	9.98	7.87	7.27	7.21	8.69	7.81	7.59	6.33	97.1152	78.5426	52.4167	67.8689	48.0447
KP-HetLow		4502		4503		4499						KP-HetLow
	Day	L1	W1	L2	W2	L3	W3	A1	A2	A3		Date	Day	L1	W1	L2	W2	L3	W3	L4	W4	L5	W5	A1	A2	A3	A4	A5
2023-07-12	6	5.4	3.97	5.58	4.07	4.32	4.03	21.438	22.7106	17.4096		2021-07-12	6	6.46	6.07	5.82	4.7	5.7	5.02	5.28	5.21	6.36	5.03	39.2122	27.354	28.614	27.5088	31.9908
2023-07-14	8	6.2	4.47	6.3	4.51	5.67	4.46	27.714	28.413	25.2882		2021-07-14	8	6.24	4.6	5.47	3.98	5.29	4.48	5.87	4.76	4.98	3.44	28.704	21.7706	23.6992	27.9412	17.1312
2023-07-16	10	6.42	4.81	6.86	4.97	5.8	4.84	30.8802	34.0942	28.072		2021-07-16	10	5.71	4.27	5.17	3.72	5.24	5.24	6.19	4.87	3.97	3.11	24.3817	19.2324	27.4576	30.1453	12.3467
2023-07-19	13	6.9	5.83	7.66	5.88	6.49	5.52	40.227	45.0408	35.8248		2021-07-19	13	6.02	4.41	5.31	3.61	4.63	5.48	6.08	4.88	2.01	2.7	26.5482	19.1691	25.3724	29.6704	5.427
2023-07-21	15	7.98	6.38	8.6	6.72	6.98	6.01	50.9124	57.792	41.9498		2021-07-21	15	6.65	4.94	5.76	4.52	5.46	5.85	6.67	5.44	0	0	32.851	26.0352	31.941	36.2848	0
2023-07-23	17	8.24	7.03	9.25	7.13	7.13	6.79	57.9272	65.9525	48.4127		2021-07-23	17	6.95	5.24	6.41	4.5	5.24	5.9	5.6	6.13	0	0	36.418	28.845	30.916	34.328	0
2023-07-26	20	9.56	8.24	10.79	8.13	8.25	7.83	78.7744	87.7227	64.5975		2021-07-26	20	8.61	5.69	6.56	4.87	6.42	6.35	7.2	6.59	0	0	48.9909	31.9472	40.767	47.448	0
2023-07-28	22	8.72	9.75	10.9	9.13	8.89	8.53	85.02	99.517	75.8317		2021-07-28	22	8.3	6.74	7.15	5.52	7.08	6.56	7.72	7.68	0	0	55.942	39.468	46.4448	59.2896	0
2023-07-30	24	9.48	10.71	11.55	10.11	9.98	8.89	101.531	116.77	88.7222		2021-07-30	24	10.41	7.88	7.94	6.25	8.7	7.34	9.33	7.94	0	0	82.0308	49.625	63.858	74.0802	0
Figure 2C
ADPGK RESPONSE
Experiment 1 (2019_1020)
	Day 7
	KP-Adpgk			KP-HetHigh			KP-HetLow
Background replicate 1				0	7	0	5	6	2
Background replicate 1				0	1	0	32	8	0
Peptide 1				186	321	691	738	1024	918
Peptide 2				313	196	724	764	1061	922
Avg peptide - Avg Background	#DIV/0!	#DIV/0!	#DIV/0!	249.5	254.5	707.5	732.5	1035.5	919
	Day 10
	KP-Adpgk			KP-HetHigh			KP-HetLow
Background replicate 1				2	0	2	9	4	9
Background replicate 1				8	1	2	5	1	7
Peptide 1				112	731	1115	919	966	922
Peptide 2				149	580	1098	954	1005	907
Avg peptide - Avg Background	#DIV/0!	#DIV/0!	#DIV/0!	125.5	655	1104.5	929.5	983	906.5
Experiment 2 (2019_1211)
	Day 7
	KP-Adpgk			KP-HetHigh			KP-HetLow
Background replicate 1	2	0	1	28	29	30	25	26	27
Background replicate 1
Peptide 1	342	244	288	0	361	86	434	392	412
Peptide 2	373	286	279	1	331	94	378	382	382
Avg peptide - Avg Background	355.5	265	282.5	-27.5	317	60	381	361	370
	Day 10
	KP-Adpgk			KP-HetHigh			KP-HetLow
Background replicate 1	2	25	5	1	16	33	6	7	26
Background replicate 1
Peptide 1	60	171	298	87	568	624	411	309	587
Peptide 2	39	193	301	118	535	647	439	351	572
Avg peptide - Avg Background	47.5	157	294.5	101.5	535.5	602.5	419	323	553.5
	Day 14
	KP-Adpgk			KP-HetHigh			KP-HetLow
Background replicate 1	6	32	11	2	1	5	0	5	1
Background replicate 1
Peptide 1	144	113	134	27	641	253	505	99	138
Peptide 2	142	155	142	47	644	324	518	93	151
Avg peptide - Avg Background	137	102	127	35	641.5	283.5	511.5	91	143.5
Experiment 3 (2020_0303)
	Day 7
	KP-Adpgk			KP-HetHigh			KP-HetLow
Background replicate 1	2	8	0	7	0	2	8	2	11
Background replicate 1	0	6	0	1	4	0	9	5	16
Peptide 1	476	153	53	351	56	288	508	71	556
Peptide 2	509	93	46	331	65	292	498	64	611
Avg peptide - Avg Background	491.5	116	49.5	337	58.5	289	494.5	64	570
	Day 10
	KP-Adpgk			KP-HetHigh			KP-HetLow
Background replicate 1	1	0	4	1	11	0	20	6	0
Background replicate 1	2	1	0	26	1	5	2	1	2
Peptide 1	258	31	472	229	213	209	479	468	325
Peptide 2	402	45	565	198	167	247	521	489	401
Avg peptide - Avg Background	328.5	37.5	516.5	200	184	225.5	489	475	362
Experiment 4 (2020_0822)
	Day 7
	KP-Adpgk			KP-HetHigh			KP-HetLow
Background replicate 1	2	7	2	0	0	0	5	11	2
Background replicate 1	5	4	7	0	2	1	11	20	7
Peptide 1	28	69	609	2	131	374	78	54	111
Peptide 2	39	52	601	1	147	359	86	47	106
Avg peptide - Avg Background	30	55	600.5	1.5	138	366	74	35	104
	Day 10
	KP-Adpgk			KP-HetHigh			KP-HetLow
Background replicate 1	0	2	20	1	1	14	4	9	7
Background replicate 1	0	1	14	6	0	27	6	1	1
Peptide 1	566	513	528	374	167	428	544	642	293
Peptide 2	562	518	502	373	204	392	532	642	374
Avg peptide - Avg Background	564	514	498	370	185	389.5	533	637	329.5
	Day 14
	KP-Adpgk			KP-HetHigh			KP-HetLow
Background replicate 1	4	11	8	1	0	4	2	5	5
Background replicate 1	2	9	11	1	0	0	27	21	32
Peptide 1	371	291	93	366	112	164	427	439	482
Peptide 2	291	275	88	418	95	202	444	432	479
Avg peptide - Avg Background	328	273	81	391	103.5	181	421	422.5	462
Experiment 5 (2020_1201)
	Day 7
	KP-Adpgk			KP-HetHigh			KP-HetLow
Background replicate 1	3	0	1	0	0	6	6	0	2
Background replicate 1	3	2	2	0	2	12	4	4	0
Peptide 1	494	461	234	240	277	360	741	480	696
Peptide 2	483	433	242	213	297	393	777	463	687
Avg peptide - Avg Background	485.5	446	236.5	226.5	286	367.5	754	469.5	690.5
	Day 10
	KP-Adpgk			KP-HetHigh			KP-HetLow
Background replicate 1	3	21	3	0	3	0	4	20	3
Background replicate 1	0	18	13	1	9	1	3	27	2
Peptide 1	489	256	590	7	334	144	813	646	648
Peptide 2	401	177	519	9	386	156	769	640	610
Avg peptide - Avg Background	443.5	197	546.5	7.5	354	149.5	787.5	619.5	626.5
	Day 14
	KP-Adpgk			KP-HetHigh			KP-HetLow
Background replicate 1	3	2	4	0	10	1	0	4	3
Background replicate 1	3	1	9	4	6	2	0	14	3
Peptide 1	221	250	181	130	284	454	61	138	656
Peptide 2	159	168	139	144	274	462	49	114	488
Avg peptide - Avg Background	187	207.5	153.5	135	271	456.5	55	117	569
Experiment 6
	Day 7
	KP-Adpgk				KP-HetHigh				KP-HetLow
Background replicate 1	12	13	54	42	1	6	8	17	35	3	2	5
Background replicate 1	14	6	59	7	2	7	23	21	41	3	9	13
Peptide 1	380	473	379	233	27	193	180	141	463	397	233	92
Peptide 2	402	529	385	214	17	203	204	141	452	491	259	114
Avg peptide - Avg Background	378	491.5	325.5	199	20.5	191.5	176.5	122	419.5	441	240.5	94
Figure 2D
AATF RESPONSE
Experiment 1 (2019_1020)
	Day 7
	KP-Aatf			KP-HetHigh			KP-HetLow
Background replicate 1				0	7	0	5	6	2
Background replicate 1				0	1	0	32	8	0
Peptide 1				0	0	15	51	20	112
Peptide 2				0	2	12	28	53	85
Avg peptide - Avg Background	#DIV/0!	#DIV/0!	#DIV/0!	0	-3	13.5	21	29.5	97.5
	Day 10
	KP-Aatf			KP-HetHigh			KP-HetLow
Background replicate 1				2	0	2	9	4	9
Background replicate 1				8	1	2	5	1	7
Peptide 1				4	2	189	252	811	356
Peptide 2				1	2	184	224	781	264
Avg peptide - Avg Background	#DIV/0!	#DIV/0!	#DIV/0!	-2.5	1.5	184.5	231	793.5	302
Experiment 2 (2019_1211)
	Day 7
	KP-Aatf			KP-HetHigh			KP-HetLow
Background replicate 1	0	2	8	0	1	27	4	0	2
Background replicate 1
Peptide 1	0	0	0	0	29	5	46	67	287
Peptide 2	5	2	4	0	35	1	58	54	320
Avg peptide - Avg Background	2.5	-1	-6	0	31	-24	48	60.5	301.5
	Day 10
	KP-Aatf			KP-HetHigh			KP-HetLow
Background replicate 1	42	22	5	1	16	33	6	7	26
Background replicate 1
Peptide 1	65	25	18	34	18	112	28	279	122
Peptide 2	56	21	12	22	20	134	47	282	131
Avg peptide - Avg Background	18.5	1	10	27	3	90	31.5	273.5	100.5
	Day 14
	KP-Aatf			KP-HetHigh			KP-HetLow
Background replicate 1	1	0	5	2	1	5	0	5	1
Background replicate 1
Peptide 1	8	115	38	6	209	33	231	33	71
Peptide 2	28	168	32	8	211	32	195	39	93
Avg peptide - Avg Background	17	141.5	30	5	209	27.5	213	31	81
Experiment 3 (2020_0303)
	Day 7
	KP-Aatf			KP-HetHigh			KP-HetLow
Background replicate 1	0	2	0	7	0	2	8	2	11
Background replicate 1	2	1	1	1	4	0	9	5	16
Peptide 1	0	12	31	11	0	4	8	15	112
Peptide 2	0	19	27	9	0	2	12	6	84
Avg peptide - Avg Background	-1	14	28.5	6	-2	2	1.5	7	84.5
	Day 10
	KP-Aatf			KP-HetHigh			KP-HetLow
Background replicate 1	1	1	0	1	11	0	20	6	0
Background replicate 1	0	1	0	26	1	5	2	1	2
Peptide 1	1	4	2	4	4	11	85	68	51
Peptide 2	4	4	1	4	5	7	82	53	59
Avg peptide - Avg Background	2	3	1.5	-9.5	-1.5	6.5	72.5	57	54
Experiment 4 (2020_0822)
	Day 7
	KP-Aatf			KP-HetHigh			KP-HetLow
Background replicate 1	0	0	13	0	0	0	5	11	2
Background replicate 1	6	13	0	0	2	1	11	20	7
Peptide 1	112	4	6	1	0	9	8	24	26
Peptide 2	136	4	13	1	1	16	14	18	32
Avg peptide - Avg Background	121	-2.5	3	1	-0.5	12	3	5.5	24.5
	Day 10
	KP-Aatf			KP-HetHigh			KP-HetLow
Background replicate 1	4	15	9	1	1	14	4	9	7
Background replicate 1	7	6	28	6	0	27	6	1	1
Peptide 1	169	12	7	2	4	21	48	71	347
Peptide 2	182	27	9	1	6	28	28	68	348
Avg peptide - Avg Background	170	9	-10.5	-2	4.5	4	33	64.5	343.5
	Day 14
	KP-Aatf			KP-HetHigh			KP-HetLow
Background replicate 1	33	2	4	1	0	4	2	5	5
Background replicate 1	12	2	11	1	0	0	27	21	32
Peptide 1	35	1	81	28	1	11	25	95	120
Peptide 2	53	11	41	25	2	7	21	131	109
Avg peptide - Avg Background	21.5	4	53.5	25.5	1.5	7	8.5	100	96
Experiment 5 (2020_1201)
	Day 7
	KP-Aatf			KP-HetHigh			KP-HetLow
Background replicate 1	0	6	1	0	0	6	6	0	2
Background replicate 1	0	12	1	0	2	12	4	4	0
Peptide 1	20	16	3	1	1	11	337	18	80
Peptide 2	21	17	3	1	4	14	334	16	64
Avg peptide - Avg Background	20.5	7.5	2	1	1.5	3.5	330.5	15	71
	Day 10
	KP-Aatf			KP-HetHigh			KP-HetLow
Background replicate 1	1	50	9	0	3	0	4	20	3
Background replicate 1	0	46	3	1	9	1	3	27	2
Peptide 1	6	44	37	1	2	1	31	111	51
Peptide 2	1	34	23	1	7	3	33	96	39
Avg peptide - Avg Background	3	-9	24	0.5	-1.5	1.5	28.5	80	42.5
	Day 14
	KP-Aatf			KP-HetHigh			KP-HetLow
Background replicate 1	0	4	0	0	10	1	0	4	3
Background replicate 1	1	8	0	4	6	2	0	14	3
Peptide 1	184	607	80	101	183	118	2	39	12
Peptide 2	300	609	100	100	149	127	0	37	4
Avg peptide - Avg Background	241.5	602	90	98.5	158	121	1	29	5
Experiment 6
	Day 7
	KP-Aatf				KP-HetHigh				KP-HetLow
Background replicate 1	4	4	19	7	1	6	8	17	35	3	2	5
Background replicate 1	17	25	13	8	2	7	23	21	41	3	9	13
Peptide 1	103	16	14	20	68	58	36	14	382	417	104	179
Peptide 2	102	16	17	15	58	64	21	9	385	405	92	188
Avg peptide - Avg Background	92	1.5	-0.5	10	61.5	54.5	13	-7.5	345.5	408	92.5	174.5
Figure 2E
Experiment 1	Tumor		#
				4	6	8	10	12	14	16	18	21
	Group	Tumor		2023-05-19	2023-05-21	2023-05-23	2023-05-25	2023-05-27	2023-05-29	2023-05-31	2023-06-02	2023-06-05
	Donor: naïve	Aatf (right flank)	806	8.16	20.01	22.32	29.64	37.13	46.11	62.04	69.3	84.7
			807	9.1	22.1	25.2	30.8	33.54	40	47.6	53.94	74.48
			942	12.22	18.15	27.2	30.1	34.5	46.64	53.2	59.52	70.81
			943	11.16	14.82	21.32	22.95	27.44	32	38.08	47.4	59.5
		Adpgk (left flank)	806	12.6	19.43	30.4	37.6	40.5	47.2	52.29	59.5	72
			807	13.5	24.14	27.01	34.4	39.36	42.5	49.3	56.07	70
			942	16.5	25.83	27.88	31.5	39	41.65	51.62	58.88	70.3
			943	15.08	21.78	33.97	39.01	42.5	47.17	56.07	62.1	72.96
	Donor: Het High (Adpgk | Aatf)	Aatf (right flank)	805	11.89	17.25	26.07	38.64	36.52	51.15	58.9	66.5	82.84
			940	13.92	15.18	19.44	23.1	26.64	34.86	40	49.6	61.41
			941	9.69	12.76	16.32	21.6	25.9	34.4	42.14	48.4	62.83
			803	11.18	19.2	22.32	31.5	34.78	37.24	44.28	52.2	64.6
		Adpgk (left flank)	805	10.53	17.05	28.08	39.1	38.4	43.46	50.74	55.68	72.1
			940	15.66	23.04	25.74	29.67	35.42	41.87	46.2	52.2	61.38
			941	15.75	17.1	25.16	34.04	36.48	41.04	39	51.84	60.72
			803	16.17	18.81	28.38	33.6	34.32	42.35	48.14	58.29	66.6
	Donor: Het Low (Adpgk- Aatf)	Aatf (right flank)	804	8.84	16.53	23.04	28.6	33.12	38.25	45.03	48.98	54.4
			800	8.28	12.75	14.85	35.77	34.3	28	34.5	42.18	51.87
			801	12.71	13.33	15.3	19.8	20.65	30	32.76	43.86	55.8
			802	9.24	15.66	16	19.47	23.32	40.32	38.48	51.35	65.96
		Adpgk (left flank)	804	15	16.8	21.83	26.88	30.1	35	38.19	43.31	54.18
			800	13.92	20	20.4	26.4	26.46	29.25	34.32	39.33	48.75
			801	15.81	21.66	30.09	25.44	27.03	31.62	37.1	45.5	50.05
			802	16.45	25.16	27.06	31.68	33.12	38.25	41.34	48.6	61.2
		Means: Aatf	Naïve	10.2	18.8	24	28.4	33.2	41.2	50.2	57.5	72.4
			HetHigh	11.7	16.1	21	28.7	31	39.4	46.3	54.2	67.9
			HetLow	9.8	14.6	17.3	25.9	27.8	34.1	37.7	46.6	57
		Means: Adpgk	Naïve	14.4	22.8	29.8	35.6	40.3	44.6	52.3	59.1	71.3
			HetHigh	14.5	19	26.8	34.1	36.2	42.2	46	54.5	65.2
			HetLow	15.3	20.9	24.8	27.6	29.2	33.5	37.7	44.2	53.5
Experiment 2
	Tumor		#
				4	6	8	10	12	14	16	18	20	22	25
	Group	Tumor		2022-04-24	2022-04-26	2022-04-28	2022-04-30	2022-05-02	2022-05-04	2022-05-06	2022-05-08	2022-05-10	2022-05-12	2022-05-15
	Donor: naïve	Aatf (right flank)	345	10.75	17.08	21.7	34.4	43.46	50.05	55.86	62.37	82.8	99.6	116.1
			346	9.75	13.26	18.88	31.08	36.52	42.77	48.88	54.45	67.98	80.92	97.96
			650	11.16	23.1	32.86	33.5	34.5	37.44	46.44	50.16	59.85	70.08	88.8
			651	12.69	18.3	24.12	27.38	34.78	45.5	51.87	59.85	72.8	85.12	104.92
		Adpgk (left flank)	345	14.08	18.6	26.95	31.98	37.4	44.2	47.6	51.3	56.05	62	79.2
			346	13.64	18.24	22.05	23.68	33.37	39.36	45.36	53.1	65.32	79.31	99.45
			650	20.16	23.46	31.36	37.76	43.2	53.28	62.78	78.85	92.88	104.4	112.53
			651	16.45	19.2	23.5	34.02	39.76	43.66	45	45.5	50.37	62.41	72.24
	Donor: Het High (Adpgk | Aatf)	Aatf (right flank)	337	12.76	16	21.78	32.34	42	48.36	55.2	55.46	70.35	74.9	96.6
			338	13.26	12.32	22.05	26.22	32.85	44.25	45.43	53.12	57.62	65.86	84.15
			336	11.88	15.36	22.04	25.85	37.23	41.61	50.22	57.2	74.55	96.28	108.36
			654	11.44	19.98	22.94	25.37	33.88	38.22	49.28	56.96	73.5	89.6	110
		Adpgk (left flank)	337	19.04	27.9	30.8	41.58	50.49	57.57	70.4	75.71	89.54	102.4	107.01
			338	16.43	22.11	28	32.76	35.04	44.37	53.4	62.37	68.34	77	112.14
			336	14.44	19.36	18.04	21.16	22.09	31.86	42.21	46.92	54.67	74.1	91.56
			654	13.5	23.31	22.8	31.96	46.17	63.7	69.12	80.25	92.13	105.4	129.36
	Donor: Het Low (Adpgk- Aatf)	Aatf (right flank)	344	10.24	18.5	18.36	23.2	25.65	28.8	30.38	38.19	52	53.95	58.8
			655	12.24	12	18.48	25.65	32.2	42.66	46.75	49.02	73.73	75.19	104.06
			652	11.31	15.81	22.8	27.95	34.17	45.92	53.76	53.01	72.1	88.5	102.34
			653	12.15	20.01	17.1	23.8	32.12	38.64	45.76	48.72	61.11	77.76	98.4
		Adpgk (left flank)	344	13.2	17.98	15.9	27.3	30.66	36.19	41.5	43.99	50.4	63	71.25
			655	13.52	12.69	17.4	16.24	18.36	24.8	33.6	37.73	42.12	48.36	69.35
			652	16.2	21.93	21.84	23.85	35.36	38.76	44.46	57.2	69	76.65	95.12
			653	18.36	24.2	21.73	24.75	40.88	38.34	44.66	43.2	45	63	65.52
		Means: Aatf	Naïve	11.0875	17.935	24.39	31.59	37.315	43.94	50.7625	56.7075	70.8575	83.93	101.945
			HetHigh	12.335	15.915	22.2025	27.445	36.49	43.11	50.0325	55.685	69.005	81.66	99.7775
			HetLow	11.485	16.58	19.185	25.15	31.035	39.005	44.1625	47.235	64.735	73.85	90.9
		Means: Adpgk	Naïve	16.0825	19.875	25.965	31.86	38.4325	45.125	50.185	57.1875	66.155	77.03	90.855
			HetHigh	15.8525	23.17	24.91	31.865	38.4475	49.375	58.7825	66.3125	76.17	89.725	110.017
			HetLow	15.32	19.2	19.2175	23.035	31.315	34.5225	41.055	45.53	51.63	62.7525	75.31
