# Supplementary material for: Decoupled neoantigen cross-presentation by dendritic cells limits anti-tumor immunity against tumors with heterogeneous neoantigen expression
Source: eLife. 2023 Aug 7;12:e85263. doi: 10.7554/eLife.85263 (PMC10425174; doi:10.7554/eLife.85263)
Supplement: Figure 3—figure supplement 1—source data 1. [file elife-85263-fig3-figsupp1-data1.xlsx]

## Sheet: Sheet1
Supplemental Figure 5
Gating Strategy / Schematic
Files in "2021_1021_adpgk_aatf_2color_d7_d10_d14_apc"
Representative file
Lnode_HetHigh_d10_002.fcs
