# Supplementary material for: Decoupled neoantigen cross-presentation by dendritic cells limits anti-tumor immunity against tumors with heterogeneous neoantigen expression
Source: eLife. 2023 Aug 7;12:e85263. doi: 10.7554/eLife.85263 (PMC10425174; doi:10.7554/eLife.85263)
Supplement: Figure 3—figure supplement 2—source data 1. [file elife-85263-fig3-figsupp2-data1.xlsx]

## Sheet: Sheet1
Supplemental Figure 6
Files in "2019_1025_Het_Ag_mCherry_signal_Adpgk_Aatf_family"
Histoplots of mCherry expression in tumor cell lines
Files in "2019_1025_Het_Ag_mCherry_signal_Adpgk_Aatf_family"
Cell line	File
KP-mCherry	Specimen_001_mCherry_001.fcs
KP6S	Specimen_001_KP6S_002.fcs
KP-HetLow	Specimen_001_Adpgk_Aatf_005.fcs
KP-Aatf	Specimen_001_Aatf_004.fcs
KP-Adpgk	Specimen_001_Adpgk_003.fcs
