# Supplementary material for: Decoupled neoantigen cross-presentation by dendritic cells limits anti-tumor immunity against tumors with heterogeneous neoantigen expression
Source: eLife. 2023 Aug 7;12:e85263. doi: 10.7554/eLife.85263 (PMC10425174; doi:10.7554/eLife.85263)
Supplement: Figure 3—source data 1. [file elife-85263-fig3-data1.xlsx]

## Sheet: Sheet1
Figure 3A
Experiment 1 (2021_1118)
BATF3 KO
5176	m	-/-	MIX					Date	Animal	M1	M2	Area	Date	Animal	M1	M2	Area	Date	Animal	M1	M2	Area	Date	Animal	M1	M2	Area	Date	Animal	M1	M2	Area	Date	Animal	M1	M2	Area	Date	Animal	M1	M2	Area	Date	Animal	M1	M2	Area	Date	Animal
5249	f	-/-	AATF					2023-11-23	5176	4.3	3.72	15.996	2023-11-23	5176	5.61	4.65	26.0865	2023-11-28	5176	5.55	4.83	26.8065	2023-12-01	5176	5.72	6.27	35.8644	2023-12-03	5176	7.08	7.08	50.1264	2023-12-05	5176	7.76	7.28	56.4928	2023-12-09	5176	9.16	8.75	80.15	2023-12-11	5176	9.47	9.79	92.7113	2023-12-14	5176
5250	f	-/-	ADPGK						5480	5.03	3.93	19.7679		5480	5.78	4.81	27.8018		5480	6.27	5.67	35.5509		5480	6.27	5.86	36.7422		5480	7.51	6.45	48.4395		5480	8.23	7.46	61.3958		5480	9.61	8.45	81.2045		5480	10.15	9.53	96.7295		5480
5378	f	-/-	MIX						5481	5.7	4.31	24.567		5481	6.94	4.92	34.1448		5481	7.55	5.85	44.1675		5481	8.38	6.27	52.5426		5481	9.41	7.04	66.2464		5481	9.52	8.23	78.3496		5481	11.31	9.29	105.07		5481	11.43	10.39	118.758		5481
5379	m	-/-	MIX						5475	5.08	3.43	17.4244		5475	5.8	3.71	21.518		5475	6.44	4.57	29.4308		5475	7.36	5.32	39.1552		5475	7.92	6.12	48.4704		5475	8.76	6.55	57.378		5475	9.42	8.33	78.4686		5475	9.01	9.8	88.298		5475
5380	m	-/-	MIX						5476	4.91	3.75	18.4125		5476	5.41	3.74	20.2334		5476	5.55	4.16	23.088		5476	5.85	4.54	26.559		5476	6.16	5.13	31.6008		5476	7.11	6.15	43.7265		5476	6.5	6.5	42.25		5476	7.28	7.28	52.9984		5476
5381	m	-/-	WAG						5477	4.71	3.29	15.4959		5477	5.75	3.51	20.1825		5477	6.2	3.86	23.932		5477	7.08	5.05	35.754		5477	6.97	5.46	38.0562		5477	7.69	5.71	43.9099		5477	7.62	7.38	56.2356		5477	7.76	9.01	69.9176		5477
5382	m	-/-	ADPGK						5478	5.65	4.93	27.8545		5478	5.3	5.97	31.641		5478	5.35	5.47	29.2645		5478	6.14	6.04	37.0856		5478	7.12	5.06	36.0272		5478	7.3	5.55	40.515		5478	8.11	5.63	45.6593		5478	7.33	5.98	43.8334		5478
5383	f	-/-	WAG						5479	5.11	4.25	21.7175		5479	5.68	5.71	32.4328		5479	6.1	5.13	31.293		5479	6.72	5.72	38.4384		5479	7.2	6.08	43.776		5479	7.78	6.77	52.6706		5479	9.65	7.43	71.6995		5479	9.86	7.89	77.7954		5479
5384	f	-/-	WAG						5249	4.36	3.3	14.388		5249	5.14	3.71	19.0694		5249	5.53	4.65	25.7145		5249	5.44	4.26	23.1744		5249	7.12	5.38	38.3056		5249	6.97	5.35	37.2895		5249	8.16	7.54	61.5264		5249	9.13	7.54	68.8402		5249
5385	m	-/-	ADPGK						5250	4.95	3.21	15.8895		5250	6.18	4.09	25.2762		5250	6.88	4.79	32.9552		5250	7.94	5.05	40.097		5250	9.11	5.02	45.7322		5250	5.5	9.27	50.985		5250	6.73	9.78	65.8194		5250	9.94	7.01	69.6794		5250
5386	m	-/-	AATF						5378	5.52	4.36	24.0672		5378	6.4	4.25	27.2		5378	6.33	4.96	31.3968		5378	6.82	6.14	41.8748		5378	6.73	7.96	53.5708		5378	9.45	6.82	64.449		5378	8.29	8.7	72.123		5378	9.85	8.54	84.119		5378
5387	m	-/-	AATF						5383	4.22	3.37	14.2214		5383	5.89	3.86	22.7354		5383	6.66	4.79	31.9014		5383	8.08	5.74	46.3792		5383	8.21	5.13	42.1173		5383	9.26	6.33	58.6158		5383	8.61	6.48	55.7928		5383	8.73	7.27	63.4671		5383
5475	f	-/-	ADPGK						5384	6.66	4.61	30.7026		5384	9.02	5.03	45.3706		5384	10.11	6.11	61.7721		5384	10.43	6.5	67.795		5384	11.13	7.07	78.6891		5384	11.79	8.01	94.4379		5384	12.93	9.5	122.835		5384	13.56	10.81	146.584		5384
5476	f	-/-	ADPGK						5385	6.48	3.58	23.1984		5385	9.5	5.45	51.775		5385	9.99	4.66	46.5534		5385	11.02	5.53	60.9406		5385	10.94	5.65	61.811		5385	10.62	6.37	67.6494		5385	12.34	7.14	88.1076		5385	12.03	7.92	95.2776		5385
5477	f	-/-	AATF						5386	3.07	4.24	13.0168		5386	6.67	4.61	30.7487		5386	7.77	5.51	42.8127		5386	9.54	4.48	42.7392		5386	10.31	6.43	66.2933		5386	10.3	5.74	59.122		5386	11.77	6.36	74.8572		5386	12.17	6.93	84.3381		5386
5478	f	-/-	WAG						5387	3.95	4.19	16.5505		5387	6.9	4.51	31.119		5387	7.45	5.01	37.3245		5387	8.62	6.18	53.2716		5387	9.37	6.7	62.779		5387	9.76	7.06	68.9056		5387	11.49	8.23	94.5627		5387	11.94	8.88	106.027		5387
5479	f	-/-	MIX						5379	5.1	3.56	18.156		5379	5.74	3.96	22.7304		5379	6.65	4.67	31.0555		5379	6.34	5.34	33.8556		5379	8.12	5.37	43.6044		5379	8.11	6.12	49.6332		5379	11.63	7.04	81.8752		5379	11.94	8.21	98.0274		5379
5480	m	-/-	WAG						5380	4.94	4.91	24.2554		5380	6.39	6.1	38.979		5380	6.82	6.82	46.5124		5380	6.8	6.57	44.676		5380	7.48	6.82	51.0136		5380	7.77	6.88	53.4576		5380	8.97	8.81	79.0257		5380	9.54	8.52	81.2808		5380
5481	m	-/-	AATF						5381	4.65	3.83	17.8095		5381	6.25	4.32	27		5381	6.38	4.84	30.8792		5381	8.11	5.25	42.5775		5381	8.08	5.61	45.3288		5381	8.62	5.96	51.3752		5381	9.74	7.17	69.8358		5381	10.85	8	86.8		5381
									5382	4.59	3.97	18.2223		5382	6.31	4.86	30.6666		5382	6.67	5.21	34.7507		5382	6.46	5.27	34.0442		5382	7.13	5.71	40.7123		5382	7.22	6.31	45.5582		5382	8.62	7.3	62.926		5382	9.07	7.72	70.0204		5382
2021-11-18	Mice were injected with 1e6 cells/flank
			2023-11-23	2023-11-26	2023-11-28	2023-12-01	2023-12-03	2023-12-05	2023-12-09	2023-12-11	2023-12-14	2023-12-16
			5	8	10	13	15	17	21	23	26	28
KP-HetHigh	2	5176	15.996	26.0865	26.8065	35.8644	50.1264	56.4928	80.15	92.7113	102.275	106.632
	12	5378	24.0672	27.2	31.3968	41.8748	53.5708	64.449	72.123	84.119	100.11	106.92
	18	5379	18.156	22.7304	31.0555	33.8556	43.6044	49.6332	81.8752	98.0274	132.303	119.777
	19	5380	24.2554	38.979	46.5124	44.676	51.0136	53.4576	79.0257	81.2808	98.3164	112.844
	9	5479	21.7175	32.4328	31.293	38.4384	43.776	52.6706	71.6995	77.7954	102.476	102.915
KP-HetLow	20	5381	17.8095	27	30.8792	42.5775	45.3288	51.3752	69.8358	86.8	117.653	116.54
	13	5383	14.2214	22.7354	31.9014	46.3792	42.1173	58.6158	55.7928	63.4671	88.315	88.4412
	14	5384	30.7026	45.3706	61.7721	67.795	78.6891	94.4379	122.835	146.584	168.305	180.411
	8	5478	27.8545	31.641	29.2645	37.0856	36.0272	40.515	45.6593	43.8334	70.7445	79.2567
	3	5480	19.7679	27.8018	35.5509	36.7422	48.4395	61.3958	81.2045	96.7295	109.918	124.531
AATF	10	5249	14.388	19.0694	25.7145	23.1744	38.3056	37.2895	61.5264	68.8402	87.482	91.12
	16	5386	13.0168	30.7487	42.8127	42.7392	66.2933	59.122	74.8572	84.3381	119.201	120.992
	17	5387	16.5505	31.119	37.3245	53.2716	62.779	68.9056	94.5627	106.027	127.949	144.778
	7	5477	15.4959	20.1825	23.932	35.754	38.0562	43.9099	56.2356	69.9176	85.6244	89.9136
	4	5481	24.567	34.1448	44.1675	52.5426	66.2464	78.3496	105.07	118.758	137.303	152.091
ADPGK	11	5250	15.8895	25.2762	32.9552	40.097	45.7322	50.985	65.8194	69.6794	83.6506	91.466
	21	5382	18.2223	30.6666	34.7507	34.0442	40.7123	45.5582	62.926	70.0204	92.1726	109.536
	15	5385	23.1984	51.775	46.5534	60.9406	61.811	67.6494	88.1076	95.2776	134.976	144.834
	8	5475	27.8545	31.641	29.2645	37.0856	36.0272	40.515	45.6593	43.8334	70.7445	79.2567
	6	5476	18.4125	20.2334	23.088	26.559	31.6008	43.7265	42.25	52.9984	69.639	71.6968
RAG KO
5023	f	KP-HetHigh						Date	Animal	M1	M2	Area	Date	Animal	M1	M2	Area	Date	Animal	M1	M2	Area	Date	Animal	M1	M2	Area	Date	Animal	M1	M2	Area	Date	Animal	M1	M2	Area	Date	Animal	M1	M2	Area	Date	Animal	M1	M2	Area	Date	Animal
5359	f	KP-HetHigh						2023-11-23	5519	5.49	3.98	21.8502	2023-11-26	5519	6.16	3.77	23.2232	2023-11-28	5519	6.31	4.48	28.2688	2023-12-01	5519	7.1	5.57	39.547	2023-12-03	5519	7.3	6.04	44.092	2023-12-05	5519	8.51	6.38	54.2938	2023-12-09	5519	9.93	7.75	76.9575	2023-12-11	5519	10.23	8.33	85.2159	2023-12-14	5519
5514	f	KP-HetHigh							5520	4.74	4.58	21.7092		5520	5.4	5.01	27.054		5520	6.06	5.95	36.057		5520	7.39	6.51	48.1089		5520	8.09	6.96	56.3064		5520	8.49	7.53	63.9297		5520	9.14	9.14	83.5396		5520	9.82	8.86	87.0052		5520
5520	m	KP-HetHigh							5167	5.26	3.4	17.884		5167	5.02	3.43	17.2186		5167	5.21	4.13	21.5173		5167	6.07	4.91	29.8037		5167	5.67	5.67	32.1489		5167	6.93	5.84	40.4712		5167	6.88	8.47	58.2736		5167	8.66	7.94	68.7604		5167
5519	m	KP-HetHigh							5168	5.67	5.1	28.917		5168	7.02	5.93	41.6286		5168	7.54	6.96	52.4784		5168	8.09	8.79	71.1111		5168	9.16	8.36	76.5776		5168	9.46	8.92	84.3832		5168	10.7	9.96	106.572		5168	11.69	10.64	124.382		5168
4820	m	KP-HetLow							4820	5.57	3	16.71		4820	6.2	3.97	24.614		4820	7.29	5.77	42.0633		4820	9.03	6.88	62.1264		4820	7.34	6.44	47.2696		4820	8.41	6.74	56.6834		4820	12.01	7.6	91.276		4820	10.94	9.36	102.398		4820
5518	f	KP-HetLow							4821	5.32	3.96	21.0672		4821	7.09	4.66	33.0394		4821	7.03	5.06	35.5718		4821	8.13	6.11	49.6743		4821	8.94	6.62	59.1828		4821	9.58	7.38	70.7004		4821	11.66	8.66	100.976		4821	11.51	9.52	109.575		4821
5361	m	KP-HetLow							5169	4.7	3.29	15.463		5169	5.73	3.85	22.0605		5169	6.74	4.34	29.2516		5169	7.13	5.26	37.5038		5169	8.79	6.01	52.8279		5169	9.47	6.69	63.3543		5169	10.18	7.94	80.8292		5169	10.64	8.35	88.844		5169
5022	f	KP-HetLow							5170	4.91	3.77	18.5107		5170	6.58	4.54	29.8732		5170	7.16	4.65	33.294		5170	7.84	4.85	38.024		5170	8.51	6.01	51.1451		5170	9.07	6.16	55.8712		5170	9.95	6.99	69.5505		5170	10.83	7.54	81.6582		5170
5169	f	KP-HetLow							5171	4.54	3.37	15.2998		5171	5.6	4.63	25.928		5171	6.26	5.13	32.1138		5171	7.46	6.09	45.4314		5171	6.57	7.68	50.4576		5171	8.58	7.16	61.4328		5171	10.75	8.16	87.72		5171	11.56	8.86	102.422		5171
5515	f	AATF							5359	4.7	3.34	15.698		5359	5.17	4.27	22.0759		5359	5.42	5.3	28.726		5359	5.78	5.94	34.3332		5359	6.68	5.99	40.0132		5359	7.07	7.15	50.5505		5359	8.6	7.4	63.64		5359	9.1	8.43	76.713		5359
5517	f	AATF							5514	4.38	4.49	19.6662		5514	5.36	4.06	21.7616		5514	4.59	5.04	23.1336		5514	6.16	5.47	33.6952		5514	7.12	6.11	43.5032		5514	7.76	6.33	49.1208		5514	8.73	7.88	68.7924		5514	8.36	8.7	72.732		5514
5360	m	AATF							5515	4.98	4.56	22.7088		5515	5.38	4.92	26.4696		5515	5.78	5.55	32.079		5515	6.59	6.25	41.1875		5515	6.97	7.33	51.0901		5515	7.43	7.67	56.9881		5515	8.75	8.69	76.0375		5515	8.87	9.27	82.2249		5515
5024	f	AATF							5516	3.81	3.26	12.4206		5516	6.83	3.36	22.9488		5516	6.51	3.78	24.6078		5516	9.19	4.83	44.3877		5516	11.39	5.59	63.6701		5516	9.49	6.59	62.5391		5516	12.56	8.58	107.765		5516	15.12	9.33	141.07		5516
5167	m	AATF							5517	4.36	3.13	13.6468		5517	5.15	4.18	21.527		5517	5.45	4.82	26.269		5517	5.82	5.82	33.8724		5517	6.65	6.29	41.8285		5517	7.04	7.04	49.5616		5517	8.86	7.88	69.8168		5517	9.05	8.76	79.278		5517
4821	m	ADPGK							5518	4.15	3.5	14.525		5518	4.56	4.07	18.5592		5518	5.11	4.67	23.8637		5518	5.95	5.67	33.7365		5518	6.15	5.53	34.0095		5518	6.91	6.39	44.1549		5518	8	7.55	60.4		5518	8.63	7.92	68.3496		5518
5168	m	ADPGK							5360	4.69	3.24	15.1956		5360	6.25	4.19	26.1875		5360	6.45	4.83	31.1535		5360	7.12	5.44	38.7328		5360	7.8	5.85	45.63		5360	7.78	6.98	54.3044		5360	9.34	7.92	73.9728		5360	10.34	8.73	90.2682		5360
5170	f	ADPGK							5361	3.98	4.12	16.3976		5361	7.66	4.55	34.853		5361	4.5	8.26	37.17		5361	9.71	6.28	60.9788		5361	10.54	5.87	61.8698		5361	10.94	6.38	69.7972		5361	11.31	7.3	82.563		5361	12.57	7.8	98.046		5361
5171	f	ADPGK							5022	5.38	3.33	17.9154		5022	6.27	3.75	23.5125		5022	6.73	4.3	28.939		5022	7.53	5.23	39.3819		5022	8.35	5.76	48.096		5022	9.35	6.43	60.1205		5022	10.39	7.74	80.4186		5022	10.81	8.47	91.5607		5022
5516	f	ADPGK							5023	4.2	3.55	14.91		5023	5.4	4.08	22.032		5023	5.6	4.2	23.52		5023	6.55	4.95	32.4225		5023	7.22	5.73	41.3706		5023	7.77	6.3	48.951		5023	7.99	8.44	67.4356		5023	9.04	9.04	81.7216		5023
									5024	2.77	3.13	8.6701		5024	4.15	4.2	17.43		5024	4.1	4.11	16.851		5024	4.88	4.7	22.936		5024	5.59	5.1	28.509		5024	6.17	5.4	33.318		5024	7.58	7.09	53.7422		5024	8.8	7.76	68.288		5024
2021-11-18	Mice were injected with 1e6 cells/flank
			2023-11-23	2023-11-26	2023-11-28	2023-12-01	2023-12-03	2023-12-05	2023-12-09	2023-12-11	2023-12-14	2023-12-16
			5	8	10	13	15	17	21	23	26	28
KP-HetHigh	20	5023	14.91	22.032	23.52	32.4225	41.3706	48.951	67.4356	81.7216	98.8656	122.321
	11	5359	15.698	22.0759	28.726	34.3332	40.0132	50.5505	63.64	76.713	99.144	117.492
	12	5514	19.6662	21.7616	23.1336	33.6952	43.5032	49.1208	68.7924	72.732	102.676	116.55
	3	5520	21.7092	27.054	36.057	48.1089	56.3064	63.9297	83.5396	87.0052	122.734	130.072
	2	5519	21.8502	23.2232	28.2688	39.547	44.092	54.2938	76.9575	85.2159	113.879	126.127
KP-HetLow	6	4820	16.71	24.614	42.0633	62.1264	47.2696	56.6834	91.276	102.398	103.4	160.204
	16	5518	14.525	18.5592	23.8637	33.7365	34.0095	44.1549	60.4	68.3496	89.1948	97.7392
	18	5361	16.3976	34.853	37.17	60.9788	61.8698	69.7972	82.563	98.046	108.075	145.881
	19	5022	17.9154	23.5125	28.939	39.3819	48.096	60.1205	80.4186	91.5607	112.675	137.062
	8	5169	15.463	22.0605	29.2516	37.5038	52.8279	63.3543	80.8292	88.844	110.959	122.733
AATF	13	5515	22.7088	26.4696	32.079	41.1875	51.0901	56.9881	76.0375	82.2249	101.909	123.132
	15	5517	13.6468	21.527	26.269	33.8724	41.8285	49.5616	69.8168	79.278	104.032	118.311
	17	5360	15.1956	26.1875	31.1535	38.7328	45.63	54.3044	73.9728	90.2682	114.235	130.729
	21	5024	8.6701	17.43	16.851	22.936	28.509	33.318	53.7422	68.288	78.3744	93.197
	4	5167	17.884	17.2186	21.5173	29.8037	32.1489	40.4712	58.2736	68.7604	99.3744	107.503
ADPGK	7	4821	21.0672	33.0394	35.5718	49.6743	59.1828	70.7004	100.976	109.575	129.538	144.046
	5	5168	28.917	41.6286	52.4784	71.1111	76.5776	84.3832	106.572	124.382	153.011	162.818
	9	5170	18.5107	29.8732	33.294	38.024	51.1451	55.8712	69.5505	81.6582	92.488	100.263
	10	5171	15.2998	25.928	32.1138	45.4314	50.4576	61.4328	87.72	102.422	131.958	140.302
	14	5516	12.4206	22.9488	24.6078	44.3877	63.6701	62.5391	107.765	141.07	202.827	266.682
Wild-type
Aatf
	Day	L1	W1	L2	W2	L3	W3	L4	W4	L5	W5	A1	A2	A3	A4	A5
2023-11-23	5	5.3	3.14	5.5	4.09	4.24	3.75	4.55	5.41	3.8	3.14	16.642	22.495	15.9	24.6155	11.932
2023-11-26	8	7.34	5.06	4.68	3.78	6.77	4.73	5.58	4.8	4.09	3.06	37.1404	17.6904	32.0221	26.784	12.5154
2023-11-28	10	7.92	3.75	4.91	7.65	5.1	4.21	5.99	5.04	3.73	3.36	29.7	37.5615	21.471	30.1896	12.5328
2023-12-01	13	8.99	6.12	8.47	5.22	5.68	4.57	5.8	6.13	4.13	4.38	55.0188	44.2134	25.9576	35.554	18.0894
2023-12-03	15	8.16	7.13	8.53	5.91	6.53	5.53	7.42	5.8	4.73	4.73	58.1808	50.4123	36.1109	43.036	22.3729
2023-12-05	17	9.24	6.3	10.8	7.48	7.5	4.87	7.36	6.28	8.81	6.18	58.212	80.784	36.525	46.2208	54.4458
2023-12-09	21	9.8	7.48	9.81	8.1	7.56	7.4	8.27	6.59	6.91	6.08	73.304	79.461	55.944	54.4993	42.0128
2023-12-11	23	10.76	8.63	10.55	7.56	8.58	8.45	9.39	7.83	7.67	6.16	92.8588	79.758	72.501	73.5237	47.2472
2023-12-14	26	11.43	8.07	11.29	8.97	9.62	8.61	9.9	9.62	8.62	7.18	92.2401	101.271	82.8282	95.238	61.8916
2023-12-16	28	12.3	9.73	12.4	8.89	9.68	9.5	9.66	10.24	9.02	8.02	119.679	110.236	91.96	98.9184	72.3404
Adpgk
	Day	L1	W1	L2	W2	L3	W3	L4	W4	L5	W5	A1	A2	A3	A4	A5
2023-11-23	5	5.25	4.43	3.23	3.11	3.2	4.97	5.17	2.79	4.09	3.85	23.2575	10.0453	15.904	14.4243	15.7465
2023-11-26	8	6.07	3.75	7.26	4.01	5.58	2.87	6.49	4.06	6.96	4.71	22.7625	29.1126	16.0146	26.3494	32.7816
2023-11-28	10	7.43	3.96	3.11	6.48	7.63	3.94	7.22	4.09	7.48	5.27	29.4228	20.1528	30.0622	29.5298	39.4196
2023-12-01	13	6.92	4.48	6.43	3.46	6.67	5.05	6.48	3.9	6.13	4.94	31.0016	22.2478	33.6835	25.272	30.2822
2023-12-03	15	5.69	4.24	7.45	3.55	6.7	4.07	8.58	4.01	5.82	6.4	24.1256	26.4475	27.269	34.4058	37.248
2023-12-05	17	6.76	4.07	6.16	4.48	6.89	4.32	6.64	4.37	6.76	5.39	27.5132	27.5968	29.7648	29.0168	36.4364
2023-12-09	21	8.34	6.66	7.36	5.43	7.53	5	7.38	6.46	7.51	7.07	55.5444	39.9648	37.65	47.6748	53.0957
2023-12-11	23	9.2	5.35	9.15	7.63	7.39	5.48	8.98	6.96	7.46	7.3	49.22	69.8145	40.4972	62.5008	54.458
2023-12-14	26	11.53	6.46	9.94	10	8.03	6.57	9.53	8.71	8.44	7.98	74.4838	99.4	52.7571	83.0063	67.3512
2023-12-16	28	10.97	6.28	12.32	10.07	9.26	7.15	10.49	10.32	8.85	8.96	68.8916	124.062	66.209	108.257	79.296
KP-HetLow
	Day	L1	W1	L2	W2	L3	W3	L4	W4	L5	W5	A1	A2	A3	A4	A5
2023-11-23	5	4.95	3.83	3.25	3.98	5.2	4.45	5.09	4.66	5.25	3.51	18.9585	12.935	23.14	23.7194	18.4275
2023-11-26	8	4.43	4.32	3.56	3	5.49	4.86	5.5	5.4	5.09	5.21	19.1376	10.68	26.6814	29.7	26.5189
2023-11-28	10	4.29	3.73	4.89	3.75	4.59	4.44	4.67	4.05	4.02	6.59	16.0017	18.3375	20.3796	18.9135	26.4918
2023-12-01	13	2.46	3.36	4.9	3.47	4.41	4.07	4.48	3.65	6.04	4.59	8.2656	17.003	17.9487	16.352	27.7236
2023-12-03	15	0	0	3.86	3.86	0	0	3.26	3.11	6.03	5.53	0	14.8996	0	10.1386	33.3459
2023-12-05	17	0	0	5.61	2.96	0	0	3.49	2.67	6.2	5.11	0	16.6056	0	9.3183	31.682
2023-12-09	21	0	0	5.18	3.81	0	0	0	0	7.81	6.23	0	19.7358	0	0	48.6563
2023-12-11	23	0	0	5.13	3.46	0	0	0	0	8.12	7.27	0	17.7498	0	0	59.0324
2023-12-14	26	0	0	6.14	4.29	0	0	0	0	9.03	8.66	0	26.3406	0	0	78.1998
2023-12-16	28	0	0	6.82	5.06	0	0	0	0	9.84	9.44	0	34.5092	0	0	92.8896
KP-HetHigh
	Day	L1	W1	L2	W2	L3	W3	L4	W4	L5	W5	A1	A2	A3	A4	A5
2023-11-23	5	3.11	3.81	2.68	3.44	4.57	3.64	4.27	4.37	4.25	3.45	11.8491	9.2192	16.6348	18.6599	14.6625
2023-11-26	8	5.58	2.85	6.96	2.86	4.8	3.77	4.27	4.87	6.08	6.08	15.903	19.9056	18.096	20.7949	36.9664
2023-11-28	10	5.2	2.77	8.13	2.62	5.38	3.75	5.26	3.72	7.86	5.49	14.404	21.3006	20.175	19.5672	43.1514
2023-12-01	13	6.19	3.42	8.88	3.6	5.19	4.03	6.88	5.1	6.99	5.19	21.1698	31.968	20.9157	35.088	36.2781
2023-12-03	15	7.3	3.83	7.45	3.11	5.58	4.41	6.89	5.98	7.46	6.72	27.959	23.1695	24.6078	41.2022	50.1312
2023-12-05	17	6.18	4.47	6.63	3.52	6.36	4.84	6.71	5.68	8.96	6.51	27.6246	23.3376	30.7824	38.1128	58.3296
2023-12-09	21	6.68	4.16	6.4	4.05	7.41	6.8	7.85	6.61	10.11	9.85	27.7888	25.92	50.388	51.8885	99.5835
2023-12-11	23	6.12	4.76	6.92	4.25	7.91	7.37	8.64	7.19	10.5	9.69	29.1312	29.41	58.2967	62.1216	101.745
2023-12-14	26	5.33	5.29	9.17	5.86	8.54	8.48	8.85	7.76	12.35	12.35	28.1957	53.7362	72.4192	68.676	152.523
2023-12-16	28	8.26	5.92	10.62	5.84	7.82	8.63	9.45	8.74	13.39	12.42	48.8992	62.0208	67.4866	82.593	166.304
Experiment 2 (2022_0218)
Matched
RagKO		6500		6501		5883		5884		5885
Date	Day	L1	W1	L2	W2	L3	W3	L4	W4	L5	W5	A1	A2	A3	A4	A5
2022-02-24	6	4.74	3.61	5.86	3.85	5.6	4.65	3.83	5.47	3.31	4.61	17.1114	22.561	26.04	20.9501	15.2591
2022-02-26	8	5.67	4.29	7.51	4.77	8	4.99	5.86	7.07	7.95	4.5	24.3243	35.8227	39.92	41.4302	35.775
2022-03-01	11	6.12	5.66	8.15	5.94	9.15	5.58	9.16	5.94	8.84	4.95	34.6392	48.411	51.057	54.4104	43.758
2022-03-03	13	7.08	6.19	8.37	6.24	9.42	5.81	8.35	6.51	8.57	6.24	43.8252	52.2288	54.7302	54.3585	53.4768
2022-03-06	16	7.89	6.64	10.48	6.11	11.18	6.24	9.8	7.75	10.25	6.89	52.3896	64.0328	69.7632	75.95	70.6225
2022-03-08	18	8.41	7.51	10.71	6.77	11.14	7.78	10.63	6.33	11.55	7.73	63.1591	72.5067	86.6692	67.2879	89.2815
2022-03-10	20	9.63	8.01	13.08	9.63	13.62	9.58	11.64	8.36	12.03	9.18	77.1363	125.96	130.48	97.3104	110.435
Batf3 KO		5888		89		90		91		92
Date	Day	L1	W1	L2	W2	L3	W3	L4	W4	L5	W5	A1	A2	A3	A4	A5
2022-02-24	6	4.46	3.7	6.46	4.21	5.14	3.7	5.13	3.2	6.86	3.58	16.502	27.1966	19.018	16.416	24.5588
2022-02-26	8	4.76	5.98	7.02	3.95	6.02	4.01	5.6	3.75	8.08	5.35	28.4648	27.729	24.1402	21	43.228
2022-03-01	11	7.43	6.82	7.57	4.73	6.8	4.42	5.75	4.54	10.71	6.19	50.6726	35.8061	30.056	26.105	66.2949
2022-03-03	13	8.69	7.29	7.89	4.9	6.43	4.48	6.23	5.06	11.76	6.37	63.3501	38.661	28.8064	31.5238	74.9112
2022-03-06	16	7.37	10.38	6.67	8.2	5.46	5.46	6.38	4.84	11.67	8.15	76.5006	54.694	29.8116	30.8792	95.1105
2022-03-08	18	12.18	7.7	7.62	8.15	5.94	5.94	6.9	4.99	11.08	8.42	93.786	62.103	35.2836	34.431	93.2936
2022-03-10	20	12.47	8.09	8.91	6.64	6.3	5.18	7.16	5.13	13.59	9.84	100.882	59.1624	32.634	36.7308	133.726
WT		NP		R		L		B		2R
Date	Day	L1	W1	L2	W2	L3	W3	L4	W4	L5	W5	A1	A2	A3	A4	A5
2022-02-24	6	8.99	2.26	4.3	4.28	6.06	4.36	5.9	3.67	6.68	2.61	20.3174	18.404	26.4216	21.653	17.4348
2022-02-26	8	9.76	2.57	6.2	3.71	7.24	3.83	4.62	3.98	7.18	2.86	25.0832	23.002	27.7292	18.3876	20.5348
2022-03-01	11	7.15	2.49	6.79	4	7.17	3.79	5	4.1	4.53	5.79	17.8035	27.16	27.1743	20.5	26.2287
2022-03-03	13	2.74	5.76	4.46	3.8	6.46	4.01	6.19	3.84	3.98	6.41	15.7824	16.948	25.9046	23.7696	25.5118
2022-03-06	16	3.18	5.29	5.59	3.25	4.14	4.94	5.92	3.85	7.19	3.09	16.8222	18.1675	20.4516	22.792	22.2171
2022-03-08	18	7.24	4.36	7.61	4.14	6.79	4.61	6.51	4.72	7.23	5.19	31.5664	31.5054	31.3019	30.7272	37.5237
2022-03-10	20	8.2	4.95	7.28	5.06	7.42	5.35	6.98	4.84	9.18	5.85	40.59	36.8368	39.697	33.7832	53.703
Experiment 2 (2022_0422)
Matched
Batf3
Day	Date	6692		6693		6694		6688		6689		6690		6691		6685		6686		6687		6692	6693	6694	6688	6689	6690	6691	6685	6686	6687
6	2023-04-28	4.32	4.01	4.02	3.52	5.44	4.35	5.99	3.83	5.67	3.42	5.16	3.4	6.84	2.48	4.34	3.58	5.68	3.85	5.37	3.22	17.3232	14.1504	23.664	22.9417	19.3914	17.544	16.9632	15.5372	21.868	17.2914
8	2023-04-30	6.83	4.19	5.22	3.92	6.71	4.29	7.9	4.29	7.03	4.25	6.63	3.77	10.15	3.57	5.78	4.38	6.15	4.3	5.85	4.03	28.6177	20.4624	28.7859	33.891	29.8775	24.9951	36.2355	25.3164	26.445	23.5755
10	2023-05-02	7.38	4.78	6	4.3	7.36	5.32	8.52	4.6	7.55	5.08	7.82	3.98	10.94	3.76	6.23	5.18	7.1	4.17	6.49	4.56	35.2764	25.8	39.1552	39.192	38.354	31.1236	41.1344	32.2714	29.607	29.5944
13	2023-05-05	8.21	6.6	4.66	5.46	7.46	5.81	9.16	5.22	8.57	5.24	8	5.16	12.1	5.11	7.06	5.11	8.02	4.9	7.55	4.99	54.186	25.4436	43.3426	47.8152	44.9068	41.28	61.831	36.0766	39.298	37.6745
15	2023-05-07	8.3	6.13	4.76	5.9	7.55	6.43	8.98	5.87	8.87	5.6	8.83	5.8	12.84	5.47	7.39	5.6	8.66	5.85	7.82	6.14	50.879	28.084	48.5465	52.7126	49.672	51.214	70.2348	41.384	50.661	48.0148
17	2023-05-09	8.51	6.9	6.1	4.87	8.07	6.77	10.48	7.55	9.89	6.27	9.21	6.2	13.33	5.84	7.69	5.85	9.55	6.48	8.65	6.37	58.719	29.707	54.6339	79.124	62.0103	57.102	77.8472	44.9865	61.884	55.1005
19	2023-05-11	9.39	7.02	6.61	5.47	8.14	8.45	9.88	7.37	10.65	6.89	9.78	7.5	13.63	6.17	7.07	7.09	10.02	7.14	9.41	6.99	65.9178	36.1567	68.783	72.8156	73.3785	73.35	84.0971	50.1263	71.5428	65.7759
22	2023-05-14	9.21	9.75	6.8	6.24	9.21	9.21	12.17	8.47	11.66	8.1	9.89	9.21	16.59	8.35	8.83	7.45	10.99	8.26	10.62	8.51	89.7975	42.432	84.8241	103.08	94.446	91.0869	138.526	65.7835	90.7774	90.3762
24	2023-05-16	9.62	7.59	6.87	5.27	8.36	10.08	11.91	7.92	10.96	6.9	9.73	7.5	16.28	7.11	8.7	6.56	10.37	7.15	10.44	7.53	73.0158	36.2049	84.2688	94.3272	75.624	72.975	115.751	57.072	74.1455	78.6132
26	2023-05-18	12.67	9.98	8.38	7.39	10.36	8.65	14.26	9.26	12.68	8.78	12.27	9.78	19.81	9.32	8.47	10.47	12.56	10.01	12.77	9.84	126.447	61.9282	89.614	132.048	111.33	120.001	184.629	88.6809	125.726	125.657
28	2023-05-20	14.21	9.27	8.32	8.47	10.26	8.43	15.12	9.29	14.32	9.62	12.7	10.48	18.82	10.27	9.12	11.58	12.59	10.41	12.89	10.48	131.727	70.4704	86.4918	140.465	137.758	133.096	193.281	105.61	131.062	135.087
RagKO
Day	Date	6677		6678		6679		6680		6508		6677	6678	6679	6680	6508
6	2023-04-28	4.73	4.01	4.24	3.93	5.29	4.06	4.87	4.47	5.01	3.83	18.9673	16.6632	21.4774	21.7689	19.1883
8	2023-04-30	5.87	4.09	5.72	4.37	6.22	4.59	5.1	5.1	5.83	4.15	24.0083	24.9964	28.5498	26.01	24.1945
10	2023-05-02	4.85	6.26	6.08	5.38	7.09	5.17	5.74	5.03	6.7	4.69	30.361	32.7104	36.6553	28.8722	31.423
13	2023-05-05	7.34	5.83	7.34	5.75	8.1	5.96	7.13	5.65	7.16	5.7	42.7922	42.205	48.276	40.2845	40.812
15	2023-05-07	8.02	6.56	8.56	6.57	8.3	6.4	7.38	6.15	8.15	6.94	52.6112	56.2392	53.12	45.387	56.561
17	2023-05-09	9.27	7.65	10.06	8.14	8.88	7.13	8.14	7.58	8.01	7.98	70.9155	81.8884	63.3144	61.7012	63.9198
19	2023-05-11	9.57	8.55	9.48	8.87	9.22	7.58	8.96	8.09	8.78	8.78	81.8235	84.0876	69.8876	72.4864	77.0884
22	2023-05-14	10.16	9.31	11.9	9.7	10.06	9.18	8.89	9.66	10.68	9.21	94.5896	115.43	92.3508	85.8774	98.3628
24	2023-05-16	9.55	11.39	12.28	11.19	9.91	9.91	10.22	10.32	11.74	9.83	108.775	137.413	98.2081	105.47	115.404
26	2023-05-18	12.73	10.22	11.57	13.35	11.98	10.23	12.18	9.96	12.83	10.13	130.101	154.459	122.555	121.313	129.968
28	2023-05-20	14.02	11.31	14.46	12.6	12.56	10.78	11.17	12.57	12.08	10.34	158.566	182.196	135.397	140.407	124.907
WT
Day	Date	NP		R		L		B		2R		NP	R	L	B	2R
6	2023-04-28	6.25	3.52	5.61	2.88	6.08	2.87	4.73	3.42	6.7	3.53	22	16.1568	17.4496	16.1766	23.651
8	2023-04-30	7.51	3.77	6.61	3.17	5.75	2.93	6.08	2.73	6.13	3.57	28.3127	20.9537	16.8475	16.5984	21.8841
10	2023-05-02	7.49	2.96	6.91	3.37	5.05	2.55	5.09	2.68	5.09	2.72	22.1704	23.2867	12.8775	13.6412	13.8448
13	2023-05-05	2.77	4.49	7.37	4.58	6.4	2.54	3.75	3	1.88	3.76	12.4373	33.7546	16.256	11.25	7.0688
15	2023-05-07	1.67	2.77	6.81	4.38	3.18	4.55	1.72	1.72	0	0	4.6259	29.8278	14.469	2.9584	0
17	2023-05-09	0	0	7.83	5.6	5.57	3.21	0	0	0	0	0	43.848	17.8797	0	0
19	2023-05-11	0	0	9.37	6.1	3.63	7.03	0	0	0	0	0	57.157	25.5189	0	0
22	2023-05-14	0	0	11.55	7.37	7.55	4.35	0	0	0	0	0	85.1235	32.8425	0	0
24	2023-05-16	0	0	10.97	5.76	7.11	4.83	0	0	0	0	0	63.1872	34.3413	0	0
26	2023-05-18	0	0	13.27	7.97	8.01	5.38	0	0	0	0	0	105.762	43.0938	0	0
28	2023-05-20	0	0	13.12	8.62	9.2	6.44	0	0	0	0	0	113.094	59.248	0	0
Figure 3B
Experiment 1									Experiment 2
Day 7 (2021_0922)									Day 7 (2021_1021)
File name	Sample	beads	cDC1 count	tumor mass (g)	total beads	cDC1 norm with beads	cDC1/g tumor		File name	Sample	beads	cDC1 count	tumor mass (g)	total beads	cDC1 norm with beads	cDC1/g tumor
Tumor_HetHigh_001.fcs	Tumor_High 1	12204	1211	0.0516	34685	3441.78	66701.2		Tumor_HetHigh_d7_001.fcs	Tumor_High 1	13981	88	0.0828	34685	218.316	2636.67
Tumor_HetHigh_002.fcs	Tumor_High 2	7785	210	0.0672	34685	935.626	13923		Tumor_HetHigh_d7_002.fcs	Tumor_High 2	16986	146	0.0893	34685	298.128	3338.5
Tumor_HetHigh_003.fcs	Tumor_High 3	7369	216	0.0749	34685	1016.69	13573.9		Tumor_HetHigh_d7_003.fcs	Tumor_High 3	19465	51	0.0574	34685	90.8777	1583.24
Tumor_HetLow_001.fcs	Tumor_Low 1	9760	144	0.0559	34685	511.746	9154.67		Tumor_HetLow_d7_001.fcs	Tumor_Low 1	13108	33	0.0823	34685	87.3211	1061.01
Tumor_HetLow_002.fcs	Tumor_Low 2	9959	130	0.0389	34685	452.761	11639.1		Tumor_HetLow_d7_002.fcs	Tumor_Low 2	17527	30	0.0614	34685	59.3684	966.912
Tumor_HetLow_003.fcs	Tumor_Low 3	12454	157	0.0328	34685	437.253	13330.9		Tumor_HetLow_d7_003.fcs	Tumor_Low 3	17551	27	0.0788	34685	53.3585	677.138
Tumor_High 1 sample removed after performing the Dixon's test for a single outlier; resulting P=0.003.
Day 10 (2021_0924)									Day 10 (2021_1016)
File name	Sample	beads	cDC1 count	tumor mass (g)	total beads	cDC1 norm with beads	cDC1/g tumor		File name	Sample	beads	cDC1 count	tumor mass (g)	total beads	cDC1 norm with beads	cDC1/g tumor
Tumor_HetHigh_001.fcs	Tumor_High 1	20455	118	0.0733	34685	200.089	2729.73		Tumor_HetHigh_001.fcs	Tumor_High 1	12670	19	0.0644	34685	52.0138	807.668
Tumor_HetHigh_002.fcs	Tumor_High 2	16338	170	0.1077	34685	360.904	3351.01		Tumor_HetHigh_002.fcs	Tumor_High 2	22477	255	0.1228	34685	393.499	3204.39
Tumor_HetHigh_003.fcs	Tumor_High 3	17381	222	0.0914	34685	443.017	4847.01		Tumor_HetHigh_003.fcs	Tumor_High 3	20977	219	0.0986	34685	362.112	3672.53
Tumor_HetLow_001.fcs	Tumor_Low 1	25189	108	0.018	34685	148.715	8261.94		Tumor_HetLow_001.fcs	Tumor_Low 1	21471	55	0.0722	34685	88.8489	1230.59
Tumor_HetLow_002.fcs	Tumor_Low 2	18831	107	0.0339	34685	197.084	5813.7		Tumor_HetLow_002.fcs	Tumor_Low 2	21252	90	0.0665	34685	146.887	2208.83
Tumor_HetLow_003.fcs	Tumor_Low 3	22718	177	0.0399	34685	270.237	6772.86		Tumor_HetLow_003.fcs	Tumor_Low 3	16931	16	0.043	34685	32.7777	762.273
Day 14 (2021_0928)									Day 14 (2021_1016)
File name	Sample	beads	cDC1 count	tumor mass (g)	total beads	cDC1 norm with beads	cDC1/g tumor		File name	Sample	beads	cDC1 count	tumor mass (g)	total beads	cDC1 norm with beads	cDC1/g tumor
Tumor_HetHigh_001.fcs	Tumor_High 1	18682	43	0.1767	34685	79.8338	451.804		Tumor_HetHigh_001.fcs	Tumor_High 1	13830	371	0.1767	34685	930.451	5265.71
Tumor_HetHigh_002.fcs	Tumor_High 2	20436	28	0.1076	34685	47.523	441.664		Tumor_HetHigh_002.fcs	Tumor_High 2	20870	241	0.1076	34685	400.531	3722.41
Tumor_HetHigh_003.fcs	Tumor_High 3	21364	57	0.0956	34685	92.541	968.002		Tumor_HetHigh_003.fcs	Tumor_High 3	17804	159	0.0956	34685	309.757	3240.14
Tumor_HetLow_001.fcs	Tumor_Low 1	27011	13	0.0639	34685	16.6934	261.242		Tumor_HetLow_001.fcs	Tumor_Low 1	17426	93	0.0639	34685	185.109	2896.85
Tumor_HetLow_002.fcs	Tumor_Low 2	22480	28	0.1408	34685	43.202	306.832		Tumor_HetLow_002.fcs	Tumor_Low 2	16822	69	0.1408	34685	142.27	1010.44
Tumor_HetLow_003.fcs	Tumor_Low 3	21167	57	0.0402	34685	93.4022	2323.44		Tumor_HetLow_003.fcs	Tumor_Low 3	22166	85	0.0402	34685	133.007	3308.62
Figure 3C
Experiment 1					Experiment 2					Experiment 3
Day 7 (2021_0922)					Day 7 (2021_1013)					Day 7 (2021_0624)
File name	Sample	%cDC1 (of DC)	% of cDC1 with mCherry signal		File name	Sample	%cDC1 (of DC)	% of cDC1 with mCherry signal		File name	Sample	%cDC1 (of DC)	% of cDC1 with mCherry signal
Tumor_HetHigh_001.fcs	Tumor_High 1	28.9 %	4.13		Tumor_HetHigh_001.fcs	Tumor_High 1	16.2 %	9.57 %		Tumor_HetHigh_001.fcs	Tumor_High 1	31.2 %	4.29 %
Tumor_HetHigh_002.fcs	Tumor_High 2	31.0 %	2.21		Tumor_HetHigh_002.fcs	Tumor_High 2	13.6 %	9.80 %		Tumor_HetHigh_002.fcs	Tumor_High 2	33.2 %	1.83 %
Tumor_HetHigh_003.fcs	Tumor_High 3	22.8 %	1.02		Tumor_HetHigh_003.fcs	Tumor_High 3	17.9 %	9.12 %		Tumor_HetHigh_003.fcs	Tumor_High 3	33.6 %	1.94 %
Tumor_HetLow_001.fcs	Tumor_Low 1	23.5 %	3.2		Tumor_HetLow_001.fcs	Tumor_Low 1	15.7 %	6.63 %		Tumor_HetLow_001.fcs	Tumor_Low 1	46.2 %	12.5 %
Tumor_HetLow_002.fcs	Tumor_Low 2	28.7 %	4.17		Tumor_HetLow_002.fcs	Tumor_Low 2	11.5 %	3.31 %		Tumor_HetLow_002.fcs	Tumor_Low 2	34.3 %	2.98 %
Tumor_HetLow_003.fcs	Tumor_Low 3	35.8 %	1.22		Tumor_HetLow_003.fcs	Tumor_Low 3	15.7 %	3.29 %		Tumor_HetLow_003.fcs	Tumor_Low 3	39.8 %	3.55 %
Day 10 (2021_0924)					Day 10 (2021_1016)					Day 10 (2021_0624)
File name	Sample	%cDC1 (of DC)	% of cDC1 with mCherry signal		File name	Sample	%cDC1 (of DC)	% of cDC1 with mCherry signal		File name	Sample	%cDC1 (of DC)	% of cDC1 with mCherry signal
Tumor_HetHigh_001.fcs	Tumor_High 1	18.7 %	1.02 %		Tumor_HetHigh_001.fcs	Tumor_High 1	13.7 %	5.62 %		Tumor_HetHigh_001.fcs	Tumor_High 1	39.2 %	10.0 %
Tumor_HetHigh_002.fcs	Tumor_High 2	18.5 %	5.65 %		Tumor_HetHigh_002.fcs	Tumor_High 2	10.1 %	9.66 %		Tumor_HetHigh_002.fcs	Tumor_High 2	32.8 %	5.19 %
Tumor_HetHigh_003.fcs	Tumor_High 3	18.5 %	3.61 %		Tumor_HetHigh_003.fcs	Tumor_High 3	12.3 %	4.42 %		Tumor_HetHigh_003.fcs	Tumor_High 3	29.0 %	10.1 %
Tumor_HetLow_001.fcs	Tumor_Low 1	18.2 %	0.19 %		Tumor_HetLow_001.fcs	Tumor_Low 1	8.55 %	6.00 %		Tumor_HetLow_001.fcs	Tumor_Low 1	33.9 %	9.82 %
Tumor_HetLow_002.fcs	Tumor_Low 2	23.1 %	0.99 %		Tumor_HetLow_002.fcs	Tumor_Low 2	9.99 %	4.50 %		Tumor_HetLow_002.fcs	Tumor_Low 2	33.0 %	15.0 %
Tumor_HetLow_003.fcs	Tumor_Low 3	25.7 %	2.10 %		Tumor_HetLow_003.fcs	Tumor_Low 3	9.38 %	3.16 %		Tumor_HetLow_003.fcs	Tumor_Low 3	36.2 %	10.8 %
Day 14 (2021_0928)					Day 14 (2021_1020)
File name	Sample	%cDC1 (of DC)	% of cDC1 with mCherry signal		File name	Sample	%cDC1 (of DC)	% of cDC1 with mCherry signal
Tumor_HetHigh_001.fcs	Tumor_High 1	24.1 %	4.92 %		Tumor_HetHigh_001.fcs	Tumor_High 1	30.9 %	21.7 %
Tumor_HetHigh_002.fcs	Tumor_High 2	33.7 %	8.81 %		Tumor_HetHigh_002.fcs	Tumor_High 2	27.1 %	11.6 %
Tumor_HetHigh_003.fcs	Tumor_High 3	31.7 %	3.19 %		Tumor_HetHigh_003.fcs	Tumor_High 3	34.6 %	9.09 %
Tumor_HetLow_001.fcs	Tumor_Low 1	35.1 %	0 %		Tumor_HetLow_001.fcs	Tumor_Low 1	35.1 %	9.99 %
Tumor_HetLow_002.fcs	Tumor_Low 2	25.2 %	3.85 %		Tumor_HetLow_002.fcs	Tumor_Low 2	27.7 %	5.11 %
Tumor_HetLow_003.fcs	Tumor_Low 3	27.7 %	5.49 %		Tumor_HetLow_003.fcs	Tumor_Low 3	26.5 %	3.14 %
Figure 3D
Experiment 1				Experiment 1
Day 7 (2021_0922)				Day 7 (2021_1013)
File name	Sample	MFI (media) of mChe+ cDC1		File name	Sample	MFI (media) of mChe+ cDC1
Tumor_HetHigh_001.fcs	Tumor_High 1	1051		Tumor_HetHigh_001.fcs	Tumor_High 1	359
Tumor_HetHigh_002.fcs	Tumor_High 2	287		Tumor_HetHigh_002.fcs	Tumor_High 2	345
Tumor_HetHigh_003.fcs	Tumor_High 3	781		Tumor_HetHigh_003.fcs	Tumor_High 3	460
Tumor_HetLow_001.fcs	Tumor_Low 1	447		Tumor_HetLow_001.fcs	Tumor_Low 1	591
Tumor_HetLow_002.fcs	Tumor_Low 2	544		Tumor_HetLow_002.fcs	Tumor_Low 2	234
Tumor_HetLow_003.fcs	Tumor_Low 3	544		Tumor_HetLow_003.fcs	Tumor_Low 3	521
Day 10 (2021_0924)				Day 10 (2021_0924)
File name	Sample	MFI (media) of mChe+ cDC1		File name	Sample	MFI (media) of mChe+ cDC1
Tumor_HetHigh_001.fcs	Tumor_High 1	727		Tumor_HetHigh_001.fcs	Tumor_High 1	370
Tumor_HetHigh_002.fcs	Tumor_High 2	707		Tumor_HetHigh_002.fcs	Tumor_High 2	561
Tumor_HetHigh_003.fcs	Tumor_High 3	549		Tumor_HetHigh_003.fcs	Tumor_High 3	440
Tumor_HetLow_001.fcs	Tumor_Low 1	730		Tumor_HetLow_001.fcs	Tumor_Low 1	568
Tumor_HetLow_002.fcs	Tumor_Low 2	952		Tumor_HetLow_002.fcs	Tumor_Low 2	574
Tumor_HetLow_003.fcs	Tumor_Low 3	910		Tumor_HetLow_003.fcs	Tumor_Low 3	580
Day 14 (2021_0928)				Day 14 (2021_1020)
File name	Sample	MFI (media) of mChe+ cDC1		File name	Sample	MFI (media) of mChe+ cDC1
Tumor_HetHigh_001.fcs	Tumor_High 1	671		Tumor_HetHigh_001.fcs	Tumor_High 1	547
Tumor_HetHigh_002.fcs	Tumor_High 2	402		Tumor_HetHigh_002.fcs	Tumor_High 2	614
Tumor_HetHigh_003.fcs	Tumor_High 3	504		Tumor_HetHigh_003.fcs	Tumor_High 3	901
Tumor_HetLow_001.fcs	Tumor_Low 1	n/a (no mChe+ cDC1)		Tumor_HetLow_001.fcs	Tumor_Low 1	673
Tumor_HetLow_002.fcs	Tumor_Low 2	448		Tumor_HetLow_002.fcs	Tumor_Low 2	860
Tumor_HetLow_003.fcs	Tumor_Low 3	486		Tumor_HetLow_003.fcs	Tumor_Low 3	901
Figure 3E
Schematic
Figure 3F
Aatf restimulation
Experiment 1 (2021_1005)
	Aatf			KP-HetHigh			KP-HetLow
Background replicate 1	0	1	0	2	2	1	4	0
Background replicate 2	1	0	1	1	1	0	1	0	1
Sample replicate 1	113	81	11	225	536	45	349	192	125
Sample replicate 2	115	92	15	273	582	38	374	199	121
Avg sample - avg background	113.5	86	12.5	247.5	557.5	41	359	195.5	122
Experiment 2 (2022_0214)
	Aatf			KP-HetHigh			KP-HetLow
Background replicate 1	2	1		6	1	0	0	2	0
Background replicate 2	25	0		18	0	0	0	1	0
Sample replicate 1	54	131		8	7	513	809	407	791
Sample replicate 2	58	207		24	4	552	840	259	780
Avg sample - avg background	42.5	168.5		4	5	532.5	824.5	331.5	785.5
Experiment 3 (2022_0518)
	Aatf						KP-HetHigh						KP-HetLow
Background replicate 1	2	1	1		0	2	12	2	8	0	0	11	14	5	4	2	1	6
Background replicate 2	1	0	0	0	0	5	8	1	7	2	1	2	9	8	4	1	0	4
Sample replicate 1	644	41	320	35	256	12	564	67	264	89	68	819	787	882	906	824	915	280
Sample replicate 2	715	68	414	51	240	16	548	122	273	71	71	819	807	887	942	832	836	214
Avg sample - avg background	678	54	366.5	43	248	10.5	546	93	261	79	69	812.5	785.5	878	920	826.5	875	242
Figure 3G
Adpgk restimulation
Experiment 1 (2021_1005)
	Adpgk			KP-HetHigh			KP-HetLow
Background replicate 1				2	2	1	4	0
Background replicate 2				1	1	0	1	0	1
Sample replicate 1				633	246	94	675	573	699
Sample replicate 2				629	229	109	718	564	673
Avg sample - avg background	#DIV/0!	#DIV/0!	#DIV/0!	629.5	236	101	694	568.5	685
Experiment 2 (2022_0214)
	Adpgk			KP-HetHigh			KP-HetLow
Background replicate 1				6	1	0	0	2	0
Background replicate 2				18	0	0	0	1	0
Sample replicate 1				326	693	91	842	908	329
Sample replicate 2				372	681	94	839	854	324
Avg sample - avg background	#DIV/0!	#DIV/0!	#DIV/0!	337	686.5	92.5	840.5	879.5	326.5
Experiment 3 (2022_0518)
	Adpgk						KP-HetHigh						KP-HetLow
Background replicate 1	0	27	0	5	5	8	12	2	8	0	0	11	14	5	4	2	1	6
Background replicate 2	1	19	4	2	1	4	8	1	7	2	1	2	9	8	4	1	0	4
Sample replicate 1	739	949	772	965	755	913	904	598	213	154	775	935	776	412	912	882	986	589
Sample replicate 2	747	979	767	940	699	900	854	591	184	119	749	934	781	372	911	859	965	536
Avg sample - avg background	742.5	941	767.5	949	724	900.5	869	593	191	135.5	761.5	928	767	385.5	907.5	869	975	557.5
[truncated: 8 more columns]
