# Supplementary material for: Decoupled neoantigen cross-presentation by dendritic cells limits anti-tumor immunity against tumors with heterogeneous neoantigen expression
Source: eLife. 2023 Aug 7;12:e85263. doi: 10.7554/eLife.85263 (PMC10425174; doi:10.7554/eLife.85263)
Supplement: Figure 4—figure supplement 1—source data 1. [file elife-85263-fig4-figsupp1-data1.xlsx]

## Sheet: Sheet1
Supplemental Figure 7A
Schematic
Supplemental Figure 7B
ZsGreen	Day	L1	W1	L2	W2	L3	W3	A1	A2	A3
2022-05-03	5	3.15	3.92	4.13	3.98	5.63	3.74	12.348	16.4374	21.0562
2022-05-05	7	4.12	4.02	4.89	4.12	6.6	4.38	16.5624	20.1468	28.908
2022-05-07	9	4.19	4.1	5.78	4.88	6.98	4.92	17.179	28.2064	34.3416
2022-05-10	12	4.63	4.19	6.32	4.98	7.68	5.42	19.3997	31.4736	41.6256
2022-05-13	15	4.51	4.68	6.57	5.89	8.4	5.66	21.1068	38.6973	47.544
2022-05-15	17	6.37	5.2	6.61	6.61	8.68	6.26	33.124	43.6921	54.3368
2022-05-01	19	5.34	6.11	6.86	7.42	9.36	6.61	32.6274	50.9012	61.8696
2022-05-19	21	7.52	6.26	7.81	8	10.04	7.33	47.0752	62.48	73.5932
2022-05-21	23	8.28	6.93	9.41	8.08	10.46	7.87	57.3804	76.0328	82.3202
2022-05-24	26	7.55	8.37	9.14	9.34	11.49	9.02	63.1935	85.3676	103.64
2022-05-26	28	8.35	8.35	9.22	10.45	12.1	9.84	69.7225	96.349	119.064
2022-05-28	30	10.14	9.82	10.79	9.84	12.88	10.77	99.5748	106.174	138.718
2022-05-31	33	10.26	10.26	11.89	10.53	14.51	11.81	105.268	125.202	171.363
2022-06-02	35	10.52	10.98	11.41	12.9	15.13	12.78	115.51	147.189	193.361
ZsG-Adpgk	Day	L1	W1	L2	W2	L3	W3	A1	A2	A3
2022-05-03	5	5.11	3.98	3.13	3.73	4.32	3.77	20.3378	11.6749	16.2864
2022-05-05	7	4.55	5.87	4.21	4.31	4.91	4.21	26.7085	18.1451	20.6711
2022-05-07	9	4.6	6.69	4.03	4.83	4.04	4.13	30.774	19.4649	16.6852
2022-05-10	12	4.25	5.88	3.64	4.35	3.29	3.83	24.99	15.834	12.6007
2022-05-13	15	3.62	4.46	4.64	4.6	3.83	3.65	16.1452	21.344	13.9795
2022-05-15	17	4.18	4.87	4.92	4.3	3.89	3.7	20.3566	21.156	14.393
2022-05-01	19	4.04	4.81	5.25	5.49	4.21	4.23	19.4324	28.8225	17.8083
2022-05-19	21	4.74	5.21	5.71	5.53	4.95	4.95	24.6954	31.5763	24.5025
2022-05-21	23	6.37	5.52	6.92	6.93	5.83	5.35	35.1624	47.9556	31.1905
2022-05-24	26	7.99	6.36	7.75	7.66	6.83	6.99	50.8164	59.365	47.7417
2022-05-26	28	8.61	7.36	8.43	7.87	7.2	7.2	63.3696	66.3441	51.84
2022-05-28	30	8.5	7.75	9.97	8.81	8.28	8.65	65.875	87.8357	71.622
2022-05-31	33	9.61	7.75	11.27	8.99	8.81	8.14	74.4775	101.317	71.7134
2022-06-02	35	10.76	8.12	12.38	10.58	9.66	9.66	87.3712	130.98	93.3156
KP-HetLow (mChe-Adpgk-Aatf)	Day	L1	W1	L2	W2	L3	W3	A1	A2	A3
2022-05-03	5	4.37	3.02	3.54	4.47	6	4.2	13.1974	15.8238	25.2
2022-05-05	7	4.3	5.1	5.27	4.25	4.91	6.67	21.93	22.3975	32.7497
2022-05-07	9	4.25	3.89	5.49	4.09	6.26	4.14	16.5325	22.4541	25.9164
2022-05-10	12	5.84	4.11	4.4	3.5	3.06	4.4	24.0024	15.4	13.464
2022-05-13	15	4.42	5.03	4.42	3.82	0	0	22.2326	16.8844	0
2022-05-15	17	4.49	3.9	3.06	3.7	0	0	17.511	11.322	0
2022-05-01	19	3.71	4.39	2.83	3.2	0	0	16.2869	9.056	0
2022-05-19	21	5.8	4.19	3.14	3.86	0	0	24.302	12.1204	0
2022-05-21	23	5.68	4.46	3.42	4.3	0	0	25.3328	14.706	0
2022-05-24	26	5.42	6.46	5.52	4.83	0	0	35.0132	26.6616	0
2022-05-26	28	7.34	5.52	5.73	5.33	0	0	40.5168	30.5409	0
2022-05-28	30	6.59	7.43	6.93	6.2	0	0	48.9637	42.966	0
2022-05-31	33	7.71	6.67	7.22	6.29	0	0	51.4257	45.4138	0
2022-06-02	35	8.22	8.22	7.38	7.29	0	0	67.5684	53.8002	0
KP-HetLow (mChe-Aatf, ZsG-Adpgk) (new line, 2 colors)	Day	L1	W1	L2	W2	L3	W3	A1	A2	A3
2022-05-03	5	3.28	4.89	5.44	4.27	4.37	4.79	16.0392	23.2288	20.9323
2022-05-05	7	4.86	5.58	6.07	5.25	5.39	5.3	27.1188	31.8675	28.567
2022-05-07	9	4.16	5.25	5.7	4.75	5.51	4.42	21.84	27.075	24.3542
2022-05-10	12	4.18	4.12	5.63	4.34	3.94	3.93	17.2216	24.4342	15.4842
2022-05-13	15	3.03	3.69	4.45	3.87	3.45	3.43	11.1807	17.2215	11.8335
2022-05-15	17	2.62	2.92	4.14	3.35	3.38	2.98	7.6504	13.869	10.0724
2022-05-01	19	0	0	2.63	2.75	3.21	2.7	0	7.2325	8.667
2022-05-19	21	0	0	0	0	3.4	2.94	0	0	9.996
2022-05-21	23	0	0	0	0	3.53	3.26	0	0	11.5078
2022-05-24	26	0	0	0	0	4.58	4.09	0	0	18.7322
2022-05-26	28	0	0	0	0	5.45	5.33	0	0	29.0485
2022-05-28	30	0	0	0	0	6.39	5.64	0	0	36.0396
2022-05-31	33	0	0	0	0	7.05	5.93	0	0	41.8065
2022-06-02	35	0	0	0	0	7.07	6.99	0	0	49.4193
