# Supplementary material for: Decoupled neoantigen cross-presentation by dendritic cells limits anti-tumor immunity against tumors with heterogeneous neoantigen expression
Source: eLife. 2023 Aug 7;12:e85263. doi: 10.7554/eLife.85263 (PMC10425174; doi:10.7554/eLife.85263)
Supplement: Figure 4—source data 1. [file elife-85263-fig4-data1.xlsx]

## Sheet: Sheet1
Figure 4A
Schematic
Figure 4B
Experiment 1 (2022_0429)													Plotted values
File name	Sample	Live CD45+ count	% Dendritic cells (DC)	DC count	% cDC1	% cDC2	% of cDC1 without debris	% of cDC1 with debris (signal)	Double positive count (DP)	mChe+ count (mChe)	ZsG+ count (ZsG)	Signal+ count (Sum of DP+mChe+ZsG)	% of signal+ that are DP	% of signal+ that are mChe+	% of signal + that are ZsG+
Lnode_Mix_001.fcs	Lnode_High 1	1010000	8.0984	81794	20.9	37.3	96.8	3.2	55	103	355	513	10.7212	20.078	69.2008
Lnode_Mix_002.fcs	Lnode_High 2	999000	5.1101	51050	20.3	39.5	94.6	5.4	69	155	270	494	13.9676	31.3765	54.6559
Lnode_Mix_003.fcs	Lnode_High 3	291243	7.9906	23272	21	35.3	95.1	4.9	26	121	75	222	11.7117	54.5045	33.7838
Lnode_Wag2color_001.fcs	Lnode_Low 1	979000	5.5959	54784	16.7	39.8	93.2	6.8	417	117	86	620	67.2581	18.871	13.871
Lnode_Wag2color_002.fcs	Lnode_Low 2	132308	19.309	25548	19.7	34	94.8	5.2	174	60	28	262	66.4122	22.9008	10.687
Lnode_Wag2color_003.fcs	Lnode_Low 3	136707	15.539	21243	20.4	37.2	93.3	6.7	187	80	24	291	64.2612	27.4914	8.24742
Experiment 2 (2022_0603)
ONLY 45.1 POPULATION								Plotted values
File name	Sample	% of cDC1 without debris	% of cDC1 with debris (signal)	Double positive count (DP)	mChe+ count (mChe)	ZsG+ count (ZsG)	Signal+ count (Sum of DP+mChe+ZsG)	% of signal+ that are DP	% of signal+ that are mChe+	% of signal + that are ZsG+	451
Specimen_003_451mix_452wag_001.fcs	Lnode_High 1	87.9	12.1	76	82	211	369	20.5962	22.2222	57.1816	KP-HetHigh
Specimen_003_451mix_452wag_002.fcs	Lnode_High 2	86.9	13.1	389	452	1033	1874	20.7577	24.1195	55.1227	KP-HetHigh
Specimen_003_451wag_452mix_001.fcs	Lnode_Low 1	82.1	17.9	780	101	152	1033	75.5082	9.77735	14.7144	KP-HetLow
Specimen_003_451wag_452mix_002.fcs	Lnode_Low 2	86.1	13.9	1715	168	583	2466	69.5458	6.81265	23.6415	KP-HetLow
ONLY 45.2 POPULATION	Sample	% of cDC1 without debris	% of cDC1 with debris (signal)	Double positive count (DP)	mChe+ count (mChe)	ZsG+ count (ZsG)	Signal+ count (Sum of DP+mChe+ZsG)	% of signal+ that are DP	% of signal+ that are mChe+	% of signal + that are ZsG+	452
Specimen_003_451mix_452wag_001.fcs	Lnode _Low 3	88.7	11.3	307	33	75	415	73.9759	7.95181	18.0723	KP-HetLow
Specimen_003_451mix_452wag_002.fcs	Lnode_Low 4	86	14	2529	335	749	3613	69.9972	9.27207	20.7307	KP-HetLow
Specimen_003_451wag_452mix_001.fcs	Lnode_High 3	92.2	7.8	114	102	189	405	28.1481	25.1852	46.6667	KP-HetHigh
Specimen_003_451wag_452mix_002.fcs	Lnode_High 4	93.4	6.6	243	287	622	1152	21.0938	24.9132	53.9931	KP-HetHigh
Experiment 3 (2022_0627)
ONLY 45.1 POPULATION								Plotted values
Sample:	Sample	% of cDC1 without debris	% of cDC1 with debris (signal)	Double positive count (DP)	mChe+ count (mChe)	ZsG+ count (ZsG)	Signal+ count (Sum of DP+mChe+ZsG)	% of signal+ that are DP	% of signal+ that are mChe+	% of signal + that are ZsG+	451
export_lnodes_451mix_452wag_001_cd451+ or cd452+.fcs	Lnode_High 1	86	14	31	31	85	147	21.0884	21.0884	57.8231	KP-HetHigh
export_lnodes_451wag_452mix_001_cd451+ or cd452+.fcs	Lnode_Low 1	82.5	17.5	272	21	39	332	81.9277	6.3253	11.747	KP-HetLow
export_lnodes_451wag_452mix_002_cd451+ or cd452+.fcs	Lnode_Low 2	82.4	17.6	98	4	20	122	80.3279	3.27869	16.3934	KP-HetLow
ONLY 45.2 POPULATION	Sample	% of cDC1 without debris	% of cDC1 with debris (signal)	Double positive count (DP)	mChe+ count (mChe)	ZsG+ count (ZsG)	Signal+ count (Sum of DP+mChe+ZsG)	% of signal+ that are DP	% of signal+ that are mChe+	% of signal + that are ZsG+	452
export_lnodes_451mix_452wag_001_cd451+ or cd452+.fcs	Lnode_Low 3	86.2	13.8	83	8	22	113	73.4513	7.07965	19.469	KP-HetLow
export_lnodes_451wag_452mix_001_cd451+ or cd452+.fcs	Lnode_High 2	86.6	13.4	14	11	62	87	16.092	12.6437	71.2644	KP-HetHigh
export_lnodes_451wag_452mix_002_cd451+ or cd452+.fcs	Lnode_High 3	87.5	12.5	8	7	22	37	21.6216	18.9189	59.4595	KP-HetHigh
Figure 4C
Experiment 1 (2022_0429)
																	Plotted values
File name	Sample	Live CD45+ count	% Dendritic cells (DC)	DC count	% cDC1	% cDC2	% of cDC1 without debris	% of cDC1 with debris (signal)	Double positive count (DP)	mChe+ count (mChe)	ZsG+ count (ZsG)	Signal+ count (Sum of DP+mChe+ZsG)	% of signal+ that are DP	% of signal+ that are mChe+	% of signal + that are ZsG+	Single positive count (Sum of mChe+ZsG)	% of single positive that are mChe+	% of single positive that are ZsG+
Lnode_Mix_001.fcs	Lnode_High 1	1010000	8.0984	81794	20.9	37.3	96.8	3.2	55	103	355	513	10.7212	20.078	69.2008	458	22.4891	77.5109
Lnode_Mix_002.fcs	Lnode_High 2	999000	5.1101	51050	20.3	39.5	94.6	5.4	69	155	270	494	13.9676	31.3765	54.6559	425	36.4706	63.5294
Lnode_Mix_003.fcs	Lnode_High 3	291243	7.9906	23272	21	35.3	95.1	4.9	26	121	75	222	11.7117	54.5045	33.7838	196	61.7347	38.2653
Lnode_Wag2color_001.fcs	Lnode_Low 1	979000	5.5959	54784	16.7	39.8	93.2	6.8	417	117	86	620	67.2581	18.871	13.871	203	57.6355	42.3645
Lnode_Wag2color_002.fcs	Lnode_Low 2	132308	19.309	25548	19.7	34	94.8	5.2	174	60	28	262	66.4122	22.9008	10.687	88	68.1818	31.8182
Lnode_Wag2color_003.fcs	Lnode_Low 3	136707	15.539	21243	20.4	37.2	93.3	6.7	187	80	24	291	64.2612	27.4914	8.24742	104	76.9231	23.0769
Experiment 2 (2022_0603)
ONLY 45.1 POPULATION													Plotted values
File name	Sample	% of cDC1 without debris	% of cDC1 with debris (signal)	Double positive count (DP)	mChe+ count (mChe)	ZsG+ count (ZsG)	Signal+ count (Sum of DP+mChe+ZsG)	% of signal+ that are DP	% of signal+ that are mChe+	% of signal + that are ZsG+	451	Single positive count (Sum of mChe+ZsG)	% of single positive that are mChe+	% of single positive that are ZsG+
Specimen_003_451mix_452wag_001.fcs	Lnode_High 1	87.9	12.1	76	82	211	369	20.5962	22.2222	57.1816	KP-HetHigh	293	27.9863	72.0137
Specimen_003_451mix_452wag_002.fcs	Lnode_High 2	86.9	13.1	389	452	1033	1874	20.7577	24.1195	55.1227	KP-HetHigh	1485	30.4377	69.5623
Specimen_003_451wag_452mix_001.fcs	Lnode_Low 1	82.1	17.9	780	101	152	1033	75.5082	9.77735	14.7144	KP-HetLow	253	39.9209	60.0791
Specimen_003_451wag_452mix_002.fcs	Lnode_Low 2	86.1	13.9	1715	168	583	2466	69.5458	6.81265	23.6415	KP-HetLow	751	22.3702	77.6298
													Plotted values
ONLY 45.2 POPULATION	Sample	% of cDC1 without debris	% of cDC1 with debris (signal)	Double positive count (DP)	mChe+ count (mChe)	ZsG+ count (ZsG)	Signal+ count (Sum of DP+mChe+ZsG)	% of signal+ that are DP	% of signal+ that are mChe+	% of signal + that are ZsG+	452	Single positive count (Sum of mChe+ZsG)	% of single positive that are mChe+	% of single positive that are ZsG+
Specimen_003_451mix_452wag_001.fcs	Lnode _Low 3	88.7	11.3	307	33	75	415	73.9759	7.95181	18.0723	KP-HetLow	108	30.5556	69.4444
Specimen_003_451mix_452wag_002.fcs	Lnode_Low 4	86	14	2529	335	749	3613	69.9972	9.27207	20.7307	KP-HetLow	1084	30.9041	69.0959
Specimen_003_451wag_452mix_001.fcs	Lnode_High 3	92.2	7.8	114	102	189	405	28.1481	25.1852	46.6667	KP-HetHigh	291	35.0515	64.9485
Specimen_003_451wag_452mix_002.fcs	Lnode_High 4	93.4	6.6	243	287	622	1152	21.0938	24.9132	53.9931	KP-HetHigh	909	31.5732	68.4268
Experiment 3 (2022_0627)
ONLY 45.1 POPULATION													Plotted values
Sample:	Sample	% of cDC1 without debris	% of cDC1 with debris (signal)	Double positive count (DP)	mChe+ count (mChe)	ZsG+ count (ZsG)	Signal+ count (Sum of DP+mChe+ZsG)	% of signal+ that are DP	% of signal+ that are mChe+	% of signal + that are ZsG+	451	Single positive count (Sum of mChe+ZsG)	% of single positive that are mChe+	% of single positive that are ZsG+
export_lnodes_451mix_452wag_001_cd451+ or cd452+.fcs	Lnode_High 1	86	14	31	31	85	147	21.0884	21.0884	57.8231	KP-HetHigh	116	26.7241	73.2759
export_lnodes_451wag_452mix_001_cd451+ or cd452+.fcs	Lnode_Low 1	82.5	17.5	272	21	39	332	81.9277	6.3253	11.747	KP-HetLow	60	35	65
export_lnodes_451wag_452mix_002_cd451+ or cd452+.fcs	Lnode_Low 2	82.4	17.6	98	4	20	122	80.3279	3.27869	16.3934	KP-HetLow	24	16.6667	83.3333
													Plotted values
ONLY 45.2 POPULATION	Sample	% of cDC1 without debris	% of cDC1 with debris (signal)	Double positive count (DP)	mChe+ count (mChe)	ZsG+ count (ZsG)	Signal+ count (Sum of DP+mChe+ZsG)	% of signal+ that are DP	% of signal+ that are mChe+	% of signal + that are ZsG+	452	Single positive count (Sum of mChe+ZsG)	% of single positive that are mChe+	% of single positive that are ZsG+
export_lnodes_451mix_452wag_001_cd451+ or cd452+.fcs	Lnode_Low 3	86.2	13.8	83	8	22	113	73.4513	7.07965	19.469	KP-HetLow	30	26.6667	73.3333
export_lnodes_451wag_452mix_001_cd451+ or cd452+.fcs	Lnode_High 2	86.6	13.4	14	11	62	87	16.092	12.6437	71.2644	KP-HetHigh	73	15.0685	84.9315
export_lnodes_451wag_452mix_002_cd451+ or cd452+.fcs	Lnode_High 3	87.5	12.5	8	7	22	37	21.6216	18.9189	59.4595	KP-HetHigh	29	24.1379	75.8621
Figure 4D
CD40 MFI (Median fluor intensity)
Experiment 1 (2022_0429)							Plotted values
						norm to individual sample negative mfi
File name	Sample	mCherry+	ZsGreen+	Double positive	Negative	mCherry+/Negative	ZsGreen+/Negative	Double positive/Negative	Averaged Negative
Lnode_Mix_001.fcs	Lnode_High 1	24450	31716	39478	13235	1.84737	2.39637	2.98285	11065
Lnode_Mix_002.fcs	Lnode_High 2	23206	34249	36023	11146	2.082	3.07276	3.23192	11065
Lnode_Mix_003.fcs	Lnode_High 3	943	21260	26700	8814	0.106989	2.41207	3.02927	11065
Lnode_Wag2color_001.fcs	Lnode_Low 1	1972	31414	39765	11963	0.164842	2.62593	3.324	8360.33
Lnode_Wag2color_002.fcs	Lnode_Low 2	1110	16769	25763	6545	0.169595	2.56211	3.93629	8360.33
Lnode_Wag2color_003.fcs	Lnode_Low 3	1121	16808	22184	6573	0.170546	2.55713	3.37502	8360.33
Experiment 2 (2022_0603) (tumors injected into congenic mice and lnodes were pooled for staining and flow cytometry analysis)
						norm to individual sample negative mfi
File name	Sample	mCherry+	ZsGreen+	Double positive	Negative	mCherry+/Negative	ZsGreen+/Negative	Double positive/Negative	Averaged Negative
Specimen_003_451mix_452wag_001.fcs	1	29565	30219	29493	16144	1.83133	1.87184	1.82687	16016.2
Specimen_003_451mix_452wag_002.fcs	2	28508	29781	35929	17212	1.65629	1.73025	2.08744	16016.2
Specimen_003_451wag_452mix_001.fcs	3	28232	32271	33719	16260	1.73629	1.98469	2.07374	16016.2
Specimen_003_451wag_452mix_002.fcs	4	26702	26896	27489	14449	1.84802	1.86144	1.90248	16016.2
Experiment 3 (2022_0627) (tumors injected into congenic mice and lnodes were pooled for staining and flow cytometry analysis)
						norm to individual sample negative mfi
File name	Sample	mCherry+	ZsGreen+	Double positive	Negative	mCherry+/Negative	ZsGreen+/Negative	Double positive/Negative	Averaged Negative
export_lnodes_451mix_452wag_001_cd451+ or cd452+.fcs	1	28546	29167	30305	22448	1.27165	1.29931	1.35001	20260
export_lnodes_451wag_452mix_001_cd451+ or cd452+.fcs	2	24566	26956	28546	21563	1.13927	1.2501	1.32384	20260
export_lnodes_451wag_452mix_002_cd451+ or cd452+.fcs	3	23763	26828	24624	16769	1.41708	1.59986	1.46842	20260
Figure 4E
CD80 MFI (Median fluor intensity)
Experiment 1 (2022_0429)							Plotted values
						norm to individual sample negative mfi
File name	Sample	mCherry+	ZsGreen+	Double positive	Negative	mCherry+/Negative	ZsGreen+/Negative	Double positive/Negative	Averaged Negative
Lnode_Mix_001.fcs	Lnode_High 1	5050	6200	8505	2826	1.78698	2.19391	3.00955	2652
Lnode_Mix_002.fcs	Lnode_High 2	3286	5688	5799	2899	1.13349	1.96206	2.00034	2652
Lnode_Mix_003.fcs	Lnode_High 3	1353	4425	5874	2231	0.606455	1.98342	2.6329	2652
Lnode_Wag2color_001.fcs	Lnode_Low 1	1835	3967	5235	2821	0.650479	1.40624	1.85572	2325
Lnode_Wag2color_002.fcs	Lnode_Low 2	1042	3469	4176	2160	0.482407	1.60602	1.93333	2325
Lnode_Wag2color_003.fcs	Lnode_Low 3	962	2332	4751	1994	0.482447	1.16951	2.38265	2325
File name	Sample	mCherry+	ZsGreen+	Double positive	Negative	mCherry+/Negative	ZsGreen+/Negative	Double positive/Negative	Averaged Negative
Specimen_003_451mix_452wag_001.fcs	1	4185	3641	4066	2905	1.44062	1.25336	1.39966	2674
Specimen_003_451mix_452wag_002.fcs	2	3504	3441	3950	2558	1.36982	1.34519	1.54418	2674
Specimen_003_451wag_452mix_001.fcs	3	3731	4594	4811	2865	1.30227	1.60349	1.67923	2674
Specimen_003_451wag_452mix_002.fcs	4	4211	3983	4662	2368	1.77829	1.68201	1.96875	2674
Experiment 3 (2022_0627) (tumors injected into congenic mice and lnodes were pooled for staining and flow cytometry analysis)
File name	Sample	mCherry+	ZsGreen+	Double positive	Negative	mCherry+/Negative	ZsGreen+/Negative	Double positive/Negative	Averaged Negative
export_lnodes_451mix_452wag_001_cd451+ or cd452+.fcs	1	5093	4872	4228	2578	1.97556	1.88984	1.64003	2462
export_lnodes_451wag_452mix_001_cd451+ or cd452+.fcs	2	3400	4721	4913	2323	1.46362	2.03229	2.11494	2462
export_lnodes_451wag_452mix_002_cd451+ or cd452+.fcs	3	4116	3089	4986	2485	1.65634	1.24306	2.00644	2462
