# Supplementary material for: Decoupled neoantigen cross-presentation by dendritic cells limits anti-tumor immunity against tumors with heterogeneous neoantigen expression
Source: eLife. 2023 Aug 7;12:e85263. doi: 10.7554/eLife.85263 (PMC10425174; doi:10.7554/eLife.85263)
Supplement: Figure 5—source data 1. [file elife-85263-fig5-data1.xlsx]

## Sheet: Sheet1
Figure 5A
Experiment 1 (2019_1010)
Matched
KP-HetHigh checkpoint
Date	Day	L1	H1	L2	H2	L3	H3	A1	A2	A3			1 = mouse no mark
2023-10-17	7	6.86	4.9	6.11	5.02	5.96	4.89	33.614	30.6722	29.1444			2 = mouse left mark
2023-10-19	9	6.74	4.53	6.04	4.96	6.01	4.84	30.5322	29.9584	29.0884			3 = mouse right mark
2023-10-21	11	6.82	4.82	6.61	4.87	6.96	6.24	32.8724	32.1907	43.4304
2023-10-24	14	5.47	4.19	6.29	5.1	6.81	6.25	22.9193	32.079	42.5625
2023-10-26	16	4.66	4.01	5.63	5.25	6.98	7.16	18.6866	29.5575	49.9768
2023-01-29	19	4.14	3.74	6.13	5.86	8.2	7.64	15.4836	35.9218	62.648
2023-10-31	21	3.53	3.1	8.25	6.06	10.07	7.9	10.943	49.995	79.553
2023-11-02	23	2.5	2.4	7.07	5.87	9.84	8.07	6	41.5009	79.4088
2023-11-05	26	0	0	8.79	6.42	9.89	8.2	0	56.4318	81.098
2023-11-07	28	0	0	8.67	7.2	11.08	8.84	0	62.424	97.9472
2023-11-11	32	0	0	9.43	9.73	10.1	11.67	0	91.7539	117.867
2023-11-13	34	0	0	11.51	9.74	13.24	10.25	0	112.107	135.71
2023-11-15	36	0	0	10.56	11.43	10.87	12.69	0	120.701	137.94
KP-HetHigh + iso
Date	Day	L1	H1	L2	H2	L3	H3	A1	A2	A3
2023-10-17	7	6.21	5.83	5.82	4.87	5.88	4.66	36.2043	28.3434	27.4008
2023-10-19	9	5.68	5.81	5.47	5.3	5.16	4.47	33.0008	28.991	23.0652
2023-10-21	11	6.36	6.19	6.44	5.8	5.72	4.6	39.3684	37.352	26.312
2023-10-24	14	7.87	7.41	7.18	6.92	7.3	5.82	58.3167	49.6856	42.486
2023-10-26	16	8.48	7.74	7.62	7.34	7.15	6.44	65.6352	55.9308	46.046
2023-01-29	19	10.42	8.94	8.84	8.61	8.2	6.9	93.1548	76.1124	56.58
2023-10-31	21	10.11	8.97	9.44	9.5	9.78	7.8	90.6867	89.68	76.284
2023-11-02	23	10.79	8.86	9.47	9.8	9.3	8.1	95.5994	92.806	75.33
2023-11-05	26	10.86	9.51	10.63	10.03	10	8.9	103.279	106.619	89
2023-11-07	28	11.99	10.65	11.12	11.12	10.3	9.46	127.694	123.654	97.438
2023-11-11	32	13.22	11.91	13.01	12.62	12.21	11.06	157.45	164.186	135.043
2023-11-13	34	14.03	13.27	14.14	12.43	12.63	11.14	186.178	175.76	140.698
2023-11-15	36	13.55	15.47	14.23	13.06	12.35	13.74	209.619	185.844	169.689
KP-HetLow + checkpoint
Date	Day	L1	H1	L2	H2	L3	H3	A1	A2	A3
2023-10-17	7	5.8	4.89	5.88	4.95	5.82	5.08	28.362	29.106	29.5656
2023-10-19	9	4.98	4.73	5.41	4.15	3.33	3.95	23.5554	22.4515	13.1535
2023-10-21	11	4.33	3.74	5.1	3.54	4.11	3.9	16.1942	18.054	16.029
2023-10-24	14	2.1	1.94	3.37	3.48	3.81	3.27	4.074	11.7276	12.4587
2023-10-26	16	0	0	3.03	2.55	2.98	2.87	0	7.7265	8.5526
2023-01-29	19	0	0	0	0	2.14	1.68	0	0	3.5952
2023-10-31	21	0	0	0	0	0	0	0	0	0
2023-11-02	23	0	0	0	0	0	0	0	0	0
2023-11-05	26	0	0	0	0	0	0	0	0	0
2023-11-07	28	0	0	0	0	0	0	0	0	0
2023-11-11	32	0	0	0	0	0	0	0	0	0
2023-11-13	34	0	0	0	0	0	0	0	0	0
2023-11-15	36	0	0	0	0	0	0	0	0	0
KP-HetLow + iso
Date	Day	L1	H1	L2	H2	L3	H3	A1	A2	A3
2023-10-17	7	5.82	4.53	6.04	5.56	5.4	4.66	26.3646	33.5824	25.164
2023-10-19	9	5.47	4.83	5.86	5.05	5.06	4.41	26.4201	29.593	22.3146
2023-10-21	11	5.31	4.77	5.56	4.9	5.66	4.85	25.3287	27.244	27.451
2023-10-24	14	4.83	4.44	4.98	5.24	6.25	4.52	21.4452	26.0952	28.25
2023-10-26	16	4.65	4.3	5.5	5.91	3.62	4.98	19.995	32.505	18.0276
2023-01-29	19	4.42	3.62	5.87	5.53	7.1	6.04	16.0004	32.4611	42.884
2023-10-31	21	2.28	2.08	7.24	6.51	7.99	6.87	4.7424	47.1324	54.8913
2023-11-02	23	1.9	2.19	6.73	6.62	7.92	6.7	4.161	44.5526	53.064
2023-11-05	26	0	0	7.92	7.73	8.61	7.67	0	61.2216	66.0387
2023-11-07	28	0	0	9.13	8.17	8.9	8.12	0	74.5921	72.268
2023-11-11	32	0	0	10.33	9.52	10.62	9.12	0	98.3416	96.8544
2023-11-13	34	0	0	11.55	10.85	10.63	9.75	0	125.317	103.642
2023-11-15	36	0	0	12.82	10.81	11.24	10.51	0	138.584	118.132
Experiment 2 (2019_1214)
Matched
KP-HetLow		no punch		left punch		right punch						KP-HetLow		no punch		left punch		right punch
CHECKPOINT	Day	L1	W1	L2	W2	L3	W3	A1	A2	A3		ISO	Day	L1	W1	L2	W2	L3	W3	A1	A2	A3
2020-12-14	7	4.53	5.55	4.75	4.37	4.35	4.61	25.1415	20.7575	20.0535				4.49	3.95	4.26	4.73	4.25	5.62	17.7355	20.1498	23.885
2020-12-16	9	5.39	4.34	4.63	4.03	4.46	3.94	23.3926	18.6589	17.5724				5.09	4.11	4.64	4.06	5.54	4.21	20.9199	18.8384	23.3234
2020-12-19	12	4.06	4.85	3.04	3.14	3.31	3.08	19.691	9.5456	10.1948				4.76	4.4	3.36	2.72	5.77	4.2	20.944	9.1392	24.234
2020-12-21	14	3.96	3.89	2.61	2.96	2.5	2.7	15.4044	7.7256	6.75				4.86	5.2	2.29	2.8	5.21	4.52	25.272	6.412	23.5492
2020-12-23	16	2.15	2.56	1.33	1.1	1.36	1.14	5.504	1.463	1.5504				4.85	5.23	1.19	1.05	4.61	3.85	25.3655	1.2495	17.7485
2020-12-26	19	0	0	0	0	0	0	0	0	0				5.04	4.69	0	0	3.66	4	23.6376	0	14.64
2020-12-28	21	0	0	0	0	0	0	0	0	0				5.31	4.78	0	0	3.63	3.79	25.3818	0	13.7577
2020-12-30	23	0	0	0	0	0	0	0	0	0				5.79	5.13	0	0	3.33	3.35	29.7027	0	11.1555
2020-01-01	25	0	0	0	0	0	0	0	0	0				6.53	5.96	0	0	3.63	3.5	38.9188	0	12.705
KP-HetHigh		no punch		left punch		right punch						KP-HetHigh		no punch		left punch		right punch
CHECKPOINT	Day	L1	W1	L2	W2	L3	W3	A1	A2	A3		ISO	Day	L1	W1	L2	W2	L3	W3	A1	A2	A3
2020-12-14	7	4.7	4.8	5.78	5.26	4.52	5.63	22.56	30.4028	25.4476				5.74	4.04	4.48	5.06	5.04	5.74	23.1896	22.6688	28.9296
2020-12-16	9	4.87	4.87	5.11	4.98	6.09	4.35	23.7169	25.4478	26.4915				5.02	6.36	5.87	4.4	6.22	5.39	31.9272	25.828	33.5258
2020-12-19	12	5.19	5.07	5.23	5.38	4.6	5.98	26.3133	28.1374	27.508				6.71	4.75	5.93	5.11	6.09	6.55	31.8725	30.3023	39.8895
2020-12-21	14	5.3	5.64	5.3	5.8	6.45	4.35	29.892	30.74	28.0575				5.06	6.84	6.66	5.1	7.62	6.54	34.6104	33.966	49.8348
2020-12-23	16	5.62	6.3	6.07	5.82	5.95	4.28	35.406	35.3274	25.466				7.2	5.5	7.12	6.76	8.3	7.58	39.6	48.1312	62.914
2020-12-26	19	6.74	6.74	6.06	6.03	5.46	4.38	45.4276	36.5418	23.9148				7.99	6.55	8.27	7.06	9.36	7.64	52.3345	58.3862	71.5104
2020-12-28	21	6.91	7.03	6.32	5.9	6.52	4.62	48.5773	37.288	30.1224				8.58	6.74	9.16	7.82	9.68	8.72	57.8292	71.6312	84.4096
2020-12-30	23	7.86	8.07	7.16	7.14	6.83	5.65	63.4302	51.1224	38.5895				9.04	7.29	9.92	8.59	10.64	9.05	65.9016	85.2128	96.292
2020-01-01	25	8.61	8.61	7.7	8	7.82	6.74	74.1321	61.6	52.7068				10.18	7.9	9.87	8.54	11.53	9.53	80.422	84.2898	109.881
Figure 5B
Experiment 1 (2022_0415)
	Mice injected->	PBS			Replicon
	Background replicate 1	2	0	0	0	0	0
	Background replicate 2	1	0	0	0	1	0
	Sample replicate 1	0	0	0	96	132	380
	Sample replicate 2	0	0	1	141	200	408
	Averaged sample - averaged background	-1.5	0	0.5	118.5	165.5	394	< Plotted values
Experiment 1 (2022_0629)
	Mice injected->	PBS				Replicon
	Background replicate 1	0	0	1	1	1	0	4	1
	Background replicate 2	0	0	0	1	0	0	1	0
	Sample replicate 1	1	1	0	0	93	271	151	243
	Sample replicate 2	3	1	0	0	97	263	130	206
	Averaged sample - averaged background	2	1	-0.5	-1	94.5	267	138	224	< Plotted values
Figure 5C
Schematic
Figure 5D
Experiment 1 (2022_0603)
Matched
Cage 1/2	LIPID + CHECKPOINT
Day	Date	Cage 1 NP		Cage 1 Right		Cage 1 Left		Cage 1 Both		Cage 2 NP		Cage 2 Right		Cage 2 Left		Cage 2 Both		Cage 2 2 RIGHT				1	2	3	4	5	6	7	8	9
7	2022-06-10	6.04	4.88	6.06	5.33	6.81	5.3	7.39	5.24	5.88	3.95	6.09	3.37	9	4.71	6.23	4.31	2.85	3.17	------	------	29.4752	32.2998	36.093	38.7236	23.226	20.5233	42.39	26.8513	9.0345
10	2022-06-13	7.2	3.23	6.99	4.03	7.39	4.39	7.88	4.55	7.3	4.04	4.56	3.36	7.79	4.57	7.28	3.69	4.1	4.1	------	------	23.256	28.1697	32.4421	35.854	29.492	15.3216	35.6003	26.8632	16.81
12	2022-06-15	7.61	3.16	7.65	4.15	7.12	4.65	7.62	5.27	7.24	4.57	4.4	3.81	9.14	4.7	7.68	0.98	3.28	3.28	------	------	24.0476	31.7475	33.108	40.1574	33.0868	16.764	42.958	7.5264	10.7584
14	2022-06-17	6.87	3.53	6.91	6.73	7.03	4.45	8.4	6.67	7.89	4.97	4.97	4.45	9.55	5.52	8.3	5.96	3.89	3.89	------	------	24.2511	46.5043	31.2835	56.028	39.2133	22.1165	52.716	49.468	15.1321
17	2022-06-20	6.77	4.18	8.07	5.35	6.27	3.81	9.3	7.47	8.45	5.92	5.01	5.01	10.01	6.26	8.35	5.77	8.63	6.27	------	------	28.2986	43.1745	23.8887	69.471	50.024	25.1001	62.6626	48.1795	54.1101
19	2022-06-22	6.02	4.31	7.69	6.62	5.14	4.04	10.49	10.46	9.6	5.82	5.49	4.3	10.68	6.78	8.21	6.25	10.25	6.72	------	------	25.9462	50.9078	20.7656	109.725	55.872	23.607	72.4104	51.3125	68.88
21	2022-06-24	5.98	4.73	8.99	6.91	5.19	3.99	10.14	9.78	10.51	7.15	7.62	5.66	11.57	6.58	9.46	7.33	10.55	6.97	------	------	28.2854	62.1209	20.7081	99.1692	75.1465	43.1292	76.1306	69.3418	73.5335
25	2022-06-28	6.97	5.24	9.25	7	5.09	4.33	11.86	11.1	11.59	8.49	8.93	6.6	12.47	9.33	10.91	8.72	10.97	10.31	------	------	36.5228	64.75	22.0397	131.646	98.3991	58.938	116.345	95.1352	113.101
Cage 3	LIPID + ISOTYPE CONTROL ANTIBODiEs
Day	Date	NP		R		L		B		2R		1	2	3	4	5
7	2022-06-10	7.28	4.35	6.24	4.31	6.74	5.09	6.68	7.82	7.47	5.08	31.668	26.8944	34.3066	52.2376	37.9476
10	2022-06-13	7.17	4.73	5.67	4.92	7.53	4.53	7.84	6.79	6.93	4.64	33.9141	27.8964	34.1109	53.2336	32.1552
12	2022-06-15	7.19	4.8	5.67	4.39	8.1	4.29	7.78	7.13	7.15	4.95	34.512	24.8913	34.749	55.4714	35.3925
14	2022-06-17	8.08	5.57	5.68	4.5	9.02	4.78	8.18	7.4	7.18	5.35	45.0056	25.56	43.1156	60.532	38.413
17	2022-06-20	8.81	5.94	6.75	6.53	9.48	7.34	9.61	9.6	9.35	6.83	52.3314	44.0775	69.5832	92.256	63.8605
19	2022-06-22	8.25	6.96	7.55	5.63	11.34	7.8	10.09	9.43	10.04	7.02	57.42	42.5065	88.452	95.1487	70.4808
21	2022-06-24	9.56	7.67	8.17	8.17	11.9	8.84	10.26	11.45	10.73	8.79	73.3252	66.7489	105.196	117.477	94.3167
25	2022-06-28	11.1	9.73	8.23	9.26	13.43	10.27	12.57	11.1	11.05	8.96	108.003	76.2098	137.926	139.527	99.008
Cage 6 / 8	REPLICON + CHECKPOINT
Day	Date	Cage 1 NP		Cage 1 Right		Cage 1 Left		Cage 1 Both		Cage 1 2R		Cage 2 NP		Cage 2 Right		Cage 2 Left						1	2	3	4	5	6	7	8
7	2022-06-10	5.33	4.86	6.09	5.53	6.22	3.16	4.35	4.44	6.29	4.81	7.37	3.69	6.89	5.27	7.05	5.31	------	------	------	------	25.9038	33.6777	19.6552	19.314	30.2549	27.1953	36.3103	37.4355
10	2022-06-13	4.54	4.54	6.71	4.36	5.71	3.33	4.06	3.51	8.21	4.26	7.44	3.39	7.39	5.73	7.52	5.03	------	------	------	------	20.6116	29.2556	19.0143	14.2506	34.9746	25.2216	42.3447	37.8256
12	2022-06-15	4.49	3.41	6.25	3.7	4.64	2.72	3.41	3.61	7.72	3.81	5.58	3.16	6.73	5.26	7.29	5.14	------	------	------	------	15.3109	23.125	12.6208	12.3101	29.4132	17.6328	35.3998	37.4706
14	2022-06-17	4.55	3.77	6.94	4.15	4.22	2.64	3.15	2.66	6.4	4.14	5.5	2.99	6.36	5.48	5.33	5.33	------	------	------	------	17.1535	28.801	11.1408	8.379	26.496	16.445	34.8528	28.4089
17	2022-06-20	4.22	3.84	5.62	4.42	0	0	0	0	6.33	4.76	4.85	3.88	6.62	6.09	6.83	5.78	------	------	------	------	16.2048	24.8404	0	0	30.1308	18.818	40.3158	39.4774
19	2022-06-22	3.96	3.7	6.21	5.48	2.89	2.17	0	0	6.6	5.29	6.55	5.08	7.78	7.01	6.52	5.81	------	------	------	------	14.652	34.0308	6.2713	0	34.914	33.274	54.5378	37.8812
21	2022-06-24	4.23	4.07	6.64	6.8	1.99	1.99	0	0	8.62	6.02	8.05	6.04	8.19	7.68	6.92	7.93	------	------	------	------	17.2161	45.152	3.9601	0	51.8924	48.622	62.8992	54.8756
25	2022-06-28	4.92	4.16	9.04	6.98	2.17	2.17	0	0	8.62	7.27	9.91	7.36	8.72	10.22	8.72	8.47	------	------	------	------	20.4672	63.0992	4.7089	0	62.6674	72.9376	89.1184	73.8584
Cage 7 / 9	REPLICON + ISOTYPE CONTROL ANTIBODIES
Day	Date	Cage 1 NP		Cage 1 Right		Cage 1 Left		Cage 1 Both		Cage 1 2R		Cage 2 NP		Cage 2 Right		Cage 2 Left						1	2	3	4	5	6	7	8
7	2022-06-10	6.34	3.85	6.45	5.13	5.71	3.61	6.74	3.88	5.55	3.28	4.84	3.21	6.47	4.89	6.74	3.88	------	------	------	------	24.409	33.0885	20.6131	26.1512	18.204	15.5364	31.6383	26.1512
10	2022-06-13	5.37	3.21	5.57	4.13	5.81	3.48	4.58	2.7	5.19	2.59	4.52	3.13	7.69	4.72	4.66	2.72	------	------	------	------	17.2377	23.0041	20.2188	12.366	13.4421	14.1476	36.2968	12.6752
12	2022-06-15	5.55	3.75	6.07	4.03	5.96	4.34	3.55	2.94	4.15	2.78	4.58	2.98	6.75	4.57	5.22	2.84	------	------	------	------	20.8125	24.4621	25.8664	10.437	11.537	13.6484	30.8475	14.8248
14	2022-06-17	5.87	4.23	6.87	5.25	5.37	4.02	3.17	3.16	4.7	3.5	5.39	3.46	7.37	5.51	5.21	3.82	------	------	------	------	24.8301	36.0675	21.5874	10.0172	16.45	18.6494	40.6087	19.9022
17	2022-06-20	7.36	5.3	8.68	7.17	7.89	5.92	6.57	4.29	5.27	4.1	6.15	4.24	8.77	6.4	6.07	5.17	------	------	------	------	39.008	62.2356	46.7088	28.1853	21.607	26.076	56.128	31.3819
19	2022-06-22	8.31	6.11	9.9	7.72	7.94	5.44	6.28	4.27	5.23	4.61	6.38	4.42	10.25	7.72	6.25	5.79	------	------	------	------	50.7741	76.428	43.1936	26.8156	24.1103	28.1996	79.13	36.1875
21	2022-06-24	7.69	6.53	11.57	8.66	11.27	6.14	5.1	4.76	5.7	5.57	6.66	5.24	11.68	8.19	6.91	6.28	------	------	------	------	50.2157	100.196	69.1978	24.276	31.749	34.8984	95.6592	43.3948
25	2022-06-28	9.01	7.48	11.56	9.92	10.83	9.01	7.37	6.23	6.55	7.67	8.17	5.73	12.39	9.63	7.86	7.33	------	------	------	------	67.3948	114.675	97.5783	45.9151	50.2385	46.8141	119.316	57.6138
Experiment 2 (2022_0624)
Matched
Cage 1/3	LIPID + CHECKPOINT
Day	Date	Cage 1 NP		Cage 1 Right		Cage 1 Left		Cage 1 Both		Cage 2 NP		Cage 2 Right		Cage 2 Left		Cage 2 Both		Cage 2 2 RIGHT		Cage 2 2 RIGHT		1	2	3	4	5	6	7	8	9	10
7	2022-07-01	6.59	3.53	3.43	4.25	4.1	3.19	6.54	6.55	4.83	4.12	3.22	6.28	8.25	4.63	6.11	4.38	6.4	3.8	6.05	3.63	23.2627	14.5775	13.079	42.837	19.8996	20.2216	38.1975	26.7618	24.32	22.99
10	2022-07-04	6.62	3.27	7.83	6.37	4.85	2.96	7.34	6.65	5.8	4.01	8.22	3.8	9.57	3.48	6.97	5.68	6.97	4.19	6.26	4.03	21.6474	49.8771	14.356	48.811	23.258	31.236	33.3036	39.5896	29.2043	26.2294
12	2022-07-06	6.56	4.46	6.9	6.84	5.87	3.81	8.07	7.08	7.67	4.33	8.01	5.63	8.24	6.43	7.37	5.56	8.16	6.92	7.62	3.93	29.2576	47.196	22.3647	57.1356	33.2111	45.0963	52.9832	40.9772	56.4672	52.7304
16	2022-07-10	5.71	4.37	9.2	7.47	4.12	3.77	9.28	8.4	6.68	5.25	10.49	7.03	11.46	6.17	9.38	7.59	8.9	7.03	8.79	4.84	24.9527	68.724	15.5324	77.952	35.07	73.7447	70.7082	71.1942	62.567	61.7937
18	2022-07-12	6.29	4.34	10.89	8.29	5.47	3.68	10.45	8.83	8.28	6.33	10.95	7.82	12.51	7.42	9.99	8.91	10.35	7.84	11.43	7.41	27.2986	90.2781	20.1296	92.2735	52.4124	85.629	92.8242	89.0109	81.144	89.6112
20	2022-07-14	5.86	4.57	10.16	9.42	5.49	4.39	10.08	9.67	8.78	6.92	11.77	7.38	13.93	7.25	10.86	9.54	10.27	7.58	11.6	7.27	26.7802	95.7072	24.1011	97.4736	60.7576	86.8626	100.992	103.604	77.8466	87.928
22	2022-07-16	6.71	5.08	11.84	9.87	6.18	4.88	10.15	11.1	8.91	8.59	12.3	9.22	14.96	7.93	11.12	11.36	9.95	9.32	12.35	8.27	34.0868	116.861	30.1584	112.665	76.5369	113.406	118.633	126.323	92.734	115.102
25	2022-07-19	7.8	6.81	14.34	11.31	7.78	5.97	13.81	11.38	9.34	7.83	13.58	10.5	15.83	9.22	11.73	11.63	12.1	11.05	12.45	9.65	53.118	162.185	46.4466	157.158	73.1322	142.59	145.953	136.42	133.705	137.572
Cage 2/4	LIPID + ISOTYPE CONTROL ANTIBODiEs
Day	Date	Cage 1 NP		Cage 1 Right		Cage 1 Left		Cage 1 Both		Cage 2 NP		Cage 2 Right		Cage 2 Left		Cage 2 Both		Cage 2 2 RIGHT		Cage 2 2 RIGHT		1	2	3	4	5	6	7	8	9	10
7	2022-07-01	4.08	4.1	5.7	3.76	6.35	3.77	5.89	4.56	5.19	3.15	5.53	3.32	7.7	4.93	5.41	5.97	3.23	5.16	4.51	3.71	16.728	21.432	23.9395	26.8584	16.3485	18.3596	37.961	32.2977	16.6668	23.2716
10	2022-07-04	4.66	2.88	7.43	4.59	6.62	3.88	7.43	4.92	5.1	3.91	5.53	3.48	8.23	6.32	7.61	5.65	6.04	3.69	4.67	3.24	13.4208	34.1037	25.6856	36.5556	19.941	19.2444	52.0136	42.9965	22.2876	17.2323
12	2022-07-06	5.28	3.37	9.47	5.36	7.75	4.58	7.23	4.96	5.85	3.46	5.95	4.02	7.66	6.55	7.53	5.41	6.91	3.75	4.79	3.44	17.7936	50.7592	35.495	35.8608	20.241	23.919	50.173	40.7373	25.9125	17.9625
16	2022-07-10	6.68	4.51	9.78	7.33	8.49	6.04	10.94	7.46	6.54	5.47	7.9	5.4	9.14	7.18	8.55	7.92	7.26	4.34	5.61	4.52	30.1268	71.6874	51.2796	81.6124	35.7738	42.66	65.6252	67.716	31.5084	24.3474
18	2022-07-12	8.55	4.96	10.43	8	9.73	6.38	11.9	8.27	8.84	6.19	8.87	6.24	10.67	8.77	11.02	8.07	8.06	4.84	6.48	5.93	42.408	83.44	62.0774	98.413	54.7196	55.3488	93.5759	88.9314	39.0104	31.3632
20	2022-07-14	7.31	6.06	10.92	8.66	10.55	6.62	8.67	11.65	8	7.13	9.93	6.67	12.05	9.31	11.2	8.4	8.31	5.62	6.75	6.33	44.2986	94.5672	69.841	101.005	57.04	66.2331	112.186	94.08	46.7022	37.935
22	2022-07-16	8.66	6.48	11.75	9.81	11.24	7.49	13	9.49	9.01	7.77	10.46	8.76	10.89	8.37	11.01	9.46	8.98	4.7	7.23	6.65	56.1168	115.268	84.1876	123.37	70.0077	91.6296	91.1493	104.155	42.206	33.981
25	2022-07-19	8.49	9.04	12.69	10.64	11.93	8.02	15.68	9.99	9.38	8.87	10.74	10.33	10.92	11.88	10.19	12	9.53	5.88	7.54	6.83	76.7496	135.022	95.6786	156.643	83.2006	110.944	129.73	122.28	56.0364	44.3352
Cage 11/13	REPLICON + CHECKPOINT
Day	Date	Cage 1 NP		Cage 1 Right		Cage 1 Left		Cage 1 Both		Cage 1 2R		Cage 2 NP		Cage 2 Right		Cage 2 Left						1	2	3	4	5	6	7	8
7	2022-06-10	4.42	3.02	4.96	4.59	6.1	5.63	6.65	4.72	6.13	4.35	5.12	3.55	3.07	3.66	6.91	4.9					13.3484	22.7664	34.343	31.388	26.6655	18.176	11.2362	33.859
10	2022-06-13	3.27	3.27	6.25	3.29	7.46	6.13	7.63	4.47	5.81	4.07	5.44	3.65	4.84	3.38	7.3	5.54					10.6929	20.5625	45.7298	34.1061	23.6467	19.856	16.3592	40.442
12	2022-06-15	3.85	3.82	5.94	4.54	8.4	6.83	8.57	5.94	5.8	4.19	5.96	4.03	3.55	3.55	8.69	6.2					14.707	26.9676	57.372	50.9058	24.302	24.0188	12.6025	53.878
14	2022-06-17	4.68	4.22	6.38	4.64	9.69	7.72	9.81	8	5.52	3.69	7.35	5.83	6.62	4.4	9.02	7.63					19.7496	29.6032	74.8068	78.48	20.3688	42.8505	29.128	68.8226
17	2022-06-20	4.28	4.16	7.53	4.82	8.93	9.2	10.56	8.48	5.87	3.9	7.88	6.61	6.29	4.53	8.94	7.92					17.8048	36.2946	82.156	89.5488	22.893	52.0868	28.4937	70.8048
19	2022-06-22	4.54	4.44	8.78	5.06	9.61	9.22	11.91	9.1	6.32	3.9	9.17	7.5	6.1	5.05	10.05	7.89					20.1576	44.4268	88.6042	108.381	24.648	68.775	30.805	79.2945
21	2022-06-24	6.03	4.24	7.83	5.72	10.8	9.59	11.78	10.31	5.67	4.03	10.24	7.57	7.54	6.05	11.19	8.57					25.5672	44.7876	103.572	121.452	22.8501	77.5168	45.617	95.8983
25	2022-06-28	5.38	5.25	8.8	6.7	11.64	9.78	11.65	11.33	6.36	5.94	10.89	8.96	7.91	6.24	12.22	9.1					28.245	58.96	113.839	131.995	37.7784	97.5744	49.3584	111.202
Cage 12/14	REPLICON + ISOTYPE CONTROL ANTIBODIES
Day	Date	Cage 1 NP		Cage 1 Right		Cage 1 Left		Cage 1 Both		Cage 1 2R		Cage 2 NP		Cage 2 Right		Cage 2 Left						1	2	3	4	5	6	7	8
7	2022-06-10	5.52	2.93	4.73	4.73	4.44	6.35	5.24	4.16	3.96	2.6	4.98	3.32	5.47	4.49	7.85	3.66					16.1736	22.3729	28.194	21.7984	10.296	16.5336	24.5603	28.731
10	2022-06-13	6.39	3.39	6.16	3.91	6.97	5.38	5.11	3.77	5.81	3.32	6.55	4.04	6.29	4.98	8.18	4.21					21.6621	24.0856	37.4986	19.2647	19.2892	26.462	31.3242	34.4378
12	2022-06-15	6.98	4.18	5.7	4.92	8.77	5.09	5.62	4.09	5.83	3.9	6.78	3.79	6.26	4.64	8.44	4.61					29.1764	28.044	44.6393	22.9858	22.737	25.6962	29.0464	38.9084
14	2022-06-17	9.16	6.23	8.05	5.49	9.18	10.53	6.13	5.29	8.8	6.14	8.31	5.23	6.33	6.78	9.26	6.92					57.0668	44.1945	96.6654	32.4277	54.032	43.4613	42.9174	64.0792
17	2022-06-20	9.71	6.98	7.98	6.85	10.48	9.37	7.45	5.45	9.67	6.4	9.19	4.95	8.59	6.85	12.49	6.53					67.7758	54.663	98.1976	40.6025	61.888	45.4905	58.8415	81.5597
19	2022-06-22	10.12	7.79	9.1	8.08	11.22	10.32	7.72	5.85	10.07	6.12	10.01	6.61	8.58	7.64	13.82	8.65					78.8348	73.528	115.79	45.162	61.6284	66.1661	65.5512	119.543
21	2022-06-24	11.52	8.29	8.88	7.77	12.35	11.95	7.8	6.46	10.59	7.32	10.68	6.71	9.31	8.91	14.79	9.45					95.5008	68.9976	147.582	50.388	77.5188	71.6628	82.9521	139.765
25	2022-06-28	11.64	9.94	8.89	9.17	13.48	10.56	7.94	8.84	11.2	7.36	10.95	7.09	10.34	9.87	15.03	9.26					115.702	81.5213	142.349	70.1896	82.432	77.6355	102.056	139.178
Experiment 3 (2022_0813)
Matched
LIPID + CHECKPOINT
Checkpoint	1, 5	No punch		Right		Left		Both		2 Right		Other cage - NP		Other cage - Right
Date	Day	L	R	L	R	L	R	L	R	L	R	L	R	L	R	A1	A2	A3	A4	A5	A6	A7
2022-08-20	7	7.44	5.89	7.55	4.3	4.86	4.24	6.57	3.55	4.08	5.58	4.53	2.89	8.22	4.17	43.8216	32.465	20.6064	23.3235	22.7664	13.0917	34.2774
2022-08-23	10	7.79	5.74	8.01	4.43	6.78	6.87	7.6	4.18	8.18	4.94	7.21	5.23	10.78	5.22	44.7146	35.4843	46.5786	31.768	40.4092	37.7083	56.2716
2022-08-25	12	5.74	7.47	7.5	5.48	6.16	5.25	7.19	5.26	7.7	4.96	6.46	5.16	10.86	4.73	42.8778	41.1	32.34	37.8194	38.192	33.3336	51.3678
2022-08-29	16	9.26	9.34	7.63	6.12	8.04	7.67	7.9	5.83	7.96	6.25	8.51	8.18	11.11	6.34	86.4884	46.6956	61.6668	46.057	49.75	69.6118	70.4374
2022-08-31	18	7.86	7.8	3.84	8.01	6.67	7.08	5.02	7.13	6.39	9.42	8.81	6.2	5.4	10.01	61.308	30.7584	47.2236	35.7926	60.1938	54.622	54.054
2022-09-02	20	9.49	9.53	9.19	7.3	9.55	6.96	8.55	5.94	9.22	7.44	10.23	7.53	7.15	12.13	90.4397	67.087	66.468	50.787	68.5968	77.0319	86.7295
LIPID + ISOTYPE CONTROL ANTIBODiEs
iso	3, 5	No punch		Right		Left		Both		2 Right		Other cage - NP		Other cage - Right
Date	Day	L	R	L	R	L	R	L	R	L	R	L	R	L	R	A1	A2	A3	A4	A5	A6	A7
2022-08-20	7	7.96	5.22	5.78	4.44	4.73	2.76	8.34	2.72	6.37	3.33	6.13	3.6	4.5	4.5	41.5512	25.6632	13.0548	22.6848	21.2121	22.068	20.25
2022-08-23	10	9.2	7.14	6.75	4.67	3.13	5.07	8.84	4.23	9.34	4.9	4.75	2.94	4.65	3.16	65.688	31.5225	15.8691	37.3932	45.766	13.965	14.694
2022-08-25	12	8.91	7.9	7.07	4.86	7.01	3.72	10.01	5.28	8.55	4.94	5.36	3.54	4.45	3.81	70.389	34.3602	26.0772	52.8528	42.237	18.9744	16.9545
2022-08-29	16	10.39	10.2	7.06	5.34	8.15	6.61	11.23	6.94	11.56	6.71	7.68	5.05	6.21	4.47	105.978	37.7004	53.8715	77.9362	77.5676	38.784	27.7587
2022-08-31	18	11.9	9.88	5.08	7.22	5.5	6.58	6.68	10.94	4.65	4.86	5.26	7.41	5.36	5.86	117.572	36.6776	36.19	73.0792	22.599	38.9766	31.4096
2022-09-02	20	13.23	11.48	8.72	6.85	7.44	6.53	14.41	8.78	7.22	5.52	8.87	6.98	8.98	5.71	151.88	59.732	48.5832	126.52	39.8544	61.9126	51.2758
REPLICON + CHECKPOINT
7, checkpoint	6,10	No punch		Right		Left		Both		2 Right		Other cage - NP		Other cage - Right
Date	Day	L	R	L	R	L	R	L	R	L	R	L	R	L	R	A1	A2	A3	A4	A5	A6	A7
2022-08-20	7	5.88	4.23	7.5	2.32	6.72	3.29	5.7	4.18	6.14	4.55	7.39	4.38	6.26	3.85	24.8724	17.4	22.1088	23.826	27.937	32.3682	24.101
2022-08-23	10	7.42	5.51	5.85	3.83	3.66	6.05	5.8	2.99	7.34	4.85	6.56	3.96	5.75	4.21	40.8842	22.4055	22.143	17.342	35.599	25.9776	24.2075
2022-08-25	12	6.27	6.03	5.7	3.19	6.85	3.42	3.8	3.12	6.03	4.19	6.59	3.91	6.72	4.84	37.8081	18.183	23.427	11.856	25.2657	25.7669	32.5248
2022-08-29	16	7.68	5.21	6.96	2.98	9.25	5.26	4.55	3.52	6.38	4.55	3.1	3.9	8.3	5.84	40.0128	20.7408	48.655	16.016	29.029	12.09	48.472
2022-08-31	18	5.16	5.55	3.9	4.57	5.34	5.12	4.54	3.97	4.32	4.63	6.16	4.76	6.62	6.25	28.638	17.823	27.3408	18.0238	20.0016	29.3216	41.375
2022-09-02	20	6.52	6.93	4.96	4.27	7.59	8.77	4.92	4.85	5.53	6.58	4.71	6.48	9.33	8.17	45.1836	21.1792	66.5643	23.862	36.3874	30.5208	76.2261
REPLICON + ISOTYPE CONTROL ANTIBODIES
7, iso	8, 10	No punch		Right		Left		Both		2 Right		Other cage - NP		Other cage - Right
Date	Day	L	R	L	R	L	R	L	R	L	R	L	R	L	R	A1	A2	A3	A4	A5	A6	A7
2022-08-20	7	8	4.52	7.68	3.91	6.43	4.55	6.97	4.31	6.01	2.3	5.68	3.73	5.09	3.94	36.16	30.0288	29.2565	30.0407	13.823	21.1864	20.0546
2022-08-23	10	8.27	5.07	8.2	7.1	7.54	4.88	6.97	5.58	6.89	3.55	8.44	4.37	7.1	4.27	41.9289	58.22	36.7952	38.8926	24.4595	36.8828	30.317
2022-08-25	12	7.44	3.92	8.62	7.02	7.76	5.29	6.96	6.04	7.65	3.73	8.61	4.85	6.09	5.01	29.1648	60.5124	41.0504	42.0384	28.5345	41.7585	30.5109
2022-08-29	16	7.78	6.18	9.85	8.58	8.74	5.66	8.57	8.39	8.9	3.81	9.5	5.67	5.17	5.46	48.0804	84.513	49.4684	71.9023	33.909	53.865	28.2282
2022-08-31	18	6.19	6.33	5.99	10.39	6.21	6.55	6.75	9.33	5.32	6.09	11.07	7.97	6.32	6.91	39.1827	62.2361	40.6755	62.9775	32.3988	88.2279	43.6712
2022-09-02	20	10.32	7.56	11.15	8.78	9.27	7.01	9.49	10.82	9.43	6.32	9.62	7.62	5.69	6.31	78.0192	97.897	64.9827	102.682	59.5976	73.3044	35.9039
