# Supplementary material for: Decoupled neoantigen cross-presentation by dendritic cells limits anti-tumor immunity against tumors with heterogeneous neoantigen expression
Source: eLife. 2023 Aug 7;12:e85263. doi: 10.7554/eLife.85263 (PMC10425174; doi:10.7554/eLife.85263)
Supplement: Figure 6—source data 1. [file elife-85263-fig6-data1.xlsx]

## Sheet: Sheet1
Figure 6A
Schematic
Figure 6B
Matched
Lipid / Isotype	Day	L1	W1	L2	W2	L3	W3	L4	W4	L5	W5	L6	W6	L7	W7	A1	A2	A3	A4	A5	A6	A7
2022-07-31	7	5.63	2.99	6.19	2.74	6.18	2.35	7.34	3.21	5.79	2.5	7.58	5.64	3.87	3.07	16.8337	16.9606	14.523	23.5614	14.475	42.7512	11.8809
2022-08-02	9	4.57	2.86	6.62	4.83	7.6	2.93	7.7	3.76	8.1	3.25	7.09	3.81	4.44	3.62	13.0702	31.9746	22.268	28.952	26.325	27.0129	16.0728
2022-08-04	11	5.1	3.26	7.95	4.71	5.15	4.18	7.05	4.69	7.3	4.05	8.31	6.71	4.37	4.31	16.626	37.4445	21.527	33.0645	29.565	55.7601	18.8347
2022-08-07	14	4.92	2.87	8.95	4.61	7.86	4.44	9.39	4.28	4.04	5.21	7.27	8.98	4.62	4.12	14.1204	41.2595	34.8984	40.1892	21.0484	65.2846	19.0344
2022-08-09	16	5.44	3.81	9.78	6.05	8.97	5.24	10.01	5.27	8.29	4.86	8.27	8.6	4.82	4.82	20.7264	59.169	47.0028	52.7527	40.2894	71.122	23.2324
2022-08-11	18	5.62	3.5	10.59	7.55	8.39	5.52	10.65	7.97	9.12	5.72	8.5	9.35	5.42	5.1	19.67	79.9545	46.3128	84.8805	52.1664	79.475	27.642
2022-08-14	21	5.77	4.15	12.67	9.01	9.97	7.1	12.15	7.34	10.29	6.89	11.3	11.38	6.71	6.14	23.9455	114.157	70.787	89.181	70.8981	128.594	41.1994
2022-08-17	24	5.86	5.42	12	9.58	10.12	8.3	12.58	8.61	12.01	7.63	12.9	12.38	8.16	7.22	31.7612	114.96	83.996	108.314	91.6363	159.702	58.9152
2023-08-19	26	6.68	5.44	12.72	11.13	11.83	8.58	13.58	9.57	12.82	9.84	13.42	11.95	8.52	8.1	36.3392	141.574	101.501	129.961	126.149	160.369	69.012
Lipid / CD40 / Isotype	Day	L1	W1	L2	W2	L3	W3	L4	W4	L5	W5	A1	A2	A3	A4	A5
2022-07-31	7	4.86	2.8	4.94	2.7	5.39	2.6	3.22	2.11	6.71	5.91	13.608	13.338	14.014	6.7942	39.6561
2022-08-02	9	4.82	2.83	5.24	2.67	5.96	2.66	5.69	2.52	6.47	5.34	13.6406	13.9908	15.8536	14.3388	34.5498
2022-08-04	11	4.74	3.38	4.65	2.86	5.19	3.17	3	2.21	7.6	6.79	16.0212	13.299	16.4523	6.63	51.604
2022-08-07	14	4.07	2.91	4.18	2.33	5.48	3.1	2	2	7.24	7.24	11.8437	9.7394	16.988	4	52.4176
2022-08-09	16	2.95	3.99	2.33	2.33	6.04	3.17	2.28	2.28	7.79	7.79	11.7705	5.4289	19.1468	5.1984	60.6841
2022-08-11	18	3.2	3.67	4.11	2.85	6.1	3.93	4.88	3.2	8.38	8.39	11.744	11.7135	23.973	15.616	70.3082
2022-08-14	21	3.67	4.95	2.87	3.76	7.07	5.04	5.84	3.68	10.24	9.27	18.1665	10.7912	35.6328	21.4912	94.9248
2022-08-17	24	4.98	4.38	3.61	4.27	4.94	6.07	5.8	4.13	12.69	8.9	21.8124	15.4147	29.9858	23.954	112.941
2023-08-19	26	5.19	5.14	6.07	4.56	8.81	6.8	9.22	5	12.82	9.78	26.6766	27.6792	59.908	46.1	125.38
Replicon / Isotype	Day	L1	W1	L2	W2	L3	W3	L4	W4	L5	W5	L6	W6	L7	W7	A1	A2	A3	A4	A5	A6	A7
2022-07-31	7	5.97	3.61	4.86	2.58	5.36	3.36	5.75	2.84	5.67	3.38	7.25	2.97	6.04	3.03	21.5517	12.5388	18.0096	16.33	19.1646	21.5325	18.3012
2022-08-02	9	5.73	4.53	5.2	2.78	6.96	3.87	6.74	3.85	6.64	3.23	7	3.09	7.07	4.64	25.9569	14.456	26.9352	25.949	21.4472	21.63	32.8048
2022-08-04	11	6.32	4.95	4.61	2.73	3.99	6.37	6.69	3.18	5.75	3.82	7.96	3.85	7.73	5.66	31.284	12.5853	25.4163	21.2742	21.965	30.646	43.7518
2022-08-07	14	8.4	4.01	5.4	3.16	8.48	5.37	7.66	4.32	6.54	3.35	9.48	4.17	8.41	5.76	33.684	17.064	45.5376	33.0912	21.909	39.5316	48.4416
2022-08-09	16	7.96	6.22	5.51	4.13	8.69	5.53	8.99	6.83	8.1	5.05	9.93	5.14	10.83	6.58	49.5112	22.7563	48.0557	61.4017	40.905	51.0402	71.2614
2022-08-11	18	8.48	7.77	6.86	4.71	1.57	6.03	9.79	7.3	9.07	5.49	11.11	6.04	12.3	7.58	65.8896	32.3106	9.4671	71.467	49.7943	67.1044	93.234
2022-08-14	21	11.21	8.7	7.84	5.68	12.37	8.4	10.99	8.5	11.21	7.22	13.24	7.76	13.21	7.92	97.527	44.5312	103.908	93.415	80.9362	102.742	104.623
2022-08-17	24	11.7	9.55	9.26	6.27	12.67	10.19	12.41	9.75	11.21	7.95	12.61	8.22	13.35	9.12	111.735	58.0602	129.107	120.998	89.1195	103.654	121.752
2023-08-19	26	13.67	9.3	9.45	7.35	13.7	10.65	12.98	10.31	13.36	9.23	14.98	10.15	13.97	10.49	127.131	69.4575	145.905	133.824	123.313	152.047	146.545
Replicon / CD40 / Isotype	Day	L1	W1	L2	W2	L3	W3	L4	W4	L5	W5	A1	A2	A3	A4	A5
2022-07-31	7	5.2	2.7	5.87	4.08	5.38	2.53	6.33	3.62	6.66	4.73	14.04	23.9496	13.6114	22.9146	31.5018
2022-08-02	9	5.77	3.65	6.89	4.98	6.19	2.43	5.61	4.33	7.37	4.18	21.0605	34.3122	15.0417	24.2913	30.8066
2022-08-04	11	5.96	4.07	6.85	4.39	6.15	3.15	6.81	3.54	7.12	3.54	24.2572	30.0715	19.3725	24.1074	25.2048
2022-08-07	14	5.79	3.84	7.66	7.54	5.54	3.03	6.03	5.09	6.02	3.15	22.2336	57.7564	16.7862	30.6927	18.963
2022-08-09	16	7.54	4.16	8.47	7.21	6.74	3.88	6.22	5.38	5.58	3.36	31.3664	61.0687	26.1512	33.4636	18.7488
2022-08-11	18	7.35	5.04	8.76	7.09	6.64	3.98	6.94	5.48	4.7	4.72	37.044	62.1084	26.4272	38.0312	22.184
2022-08-14	21	8.36	7.29	10.32	8	6.31	4.31	8.4	6.7	5.16	3.5	60.9444	82.56	27.1961	56.28	18.06
2022-08-17	24	7.57	9	10.93	8.24	5.61	3.78	7.94	6.49	2.45	2.43	68.13	90.0632	21.2058	51.5306	5.9535
2023-08-19	26	9.51	9.11	12.22	10.34	7.39	4.8	8.63	6.43	2.3	2.3	86.6361	126.355	35.472	55.4909	5.29
Figure 6C
Matched
Lipid / Isotype	Day	L1	W1	L2	W2	L3	W3	L4	W4	L5	W5	L6	W6	L7	W7	A1	A2	A3	A4	A5	A6	A7
2022-07-31	7	5.63	2.99	6.19	2.74	6.18	2.35	7.34	3.21	5.79	2.5	7.58	5.64	3.87	3.07	16.8337	16.9606	14.523	23.5614	14.475	42.7512	11.8809
2022-08-02	9	4.57	2.86	6.62	4.83	7.6	2.93	7.7	3.76	8.1	3.25	7.09	3.81	4.44	3.62	13.0702	31.9746	22.268	28.952	26.325	27.0129	16.0728
2022-08-04	11	5.1	3.26	7.95	4.71	5.15	4.18	7.05	4.69	7.3	4.05	8.31	6.71	4.37	4.31	16.626	37.4445	21.527	33.0645	29.565	55.7601	18.8347
2022-08-07	14	4.92	2.87	8.95	4.61	7.86	4.44	9.39	4.28	4.04	5.21	7.27	8.98	4.62	4.12	14.1204	41.2595	34.8984	40.1892	21.0484	65.2846	19.0344
2022-08-09	16	5.44	3.81	9.78	6.05	8.97	5.24	10.01	5.27	8.29	4.86	8.27	8.6	4.82	4.82	20.7264	59.169	47.0028	52.7527	40.2894	71.122	23.2324
2022-08-11	18	5.62	3.5	10.59	7.55	8.39	5.52	10.65	7.97	9.12	5.72	8.5	9.35	5.42	5.1	19.67	79.9545	46.3128	84.8805	52.1664	79.475	27.642
2022-08-14	21	5.77	4.15	12.67	9.01	9.97	7.1	12.15	7.34	10.29	6.89	11.3	11.38	6.71	6.14	23.9455	114.157	70.787	89.181	70.8981	128.594	41.1994
2022-08-17	24	5.86	5.42	12	9.58	10.12	8.3	12.58	8.61	12.01	7.63	12.9	12.38	8.16	7.22	31.7612	114.96	83.996	108.314	91.6363	159.702	58.9152
2023-08-19	26	6.68	5.44	12.72	11.13	11.83	8.58	13.58	9.57	12.82	9.84	13.42	11.95	8.52	8.1	36.3392	141.574	101.501	129.961	126.149	160.369	69.012
Lipid / CD40 / CBT	Day	L1	W1	L2	W2	L3	W3	L4	W4	L5	W5	A1	A2	A3	A4	A5
2022-07-31	7	6.92	2.52	6.29	2.88	6.79	2.47	4.02	5	6.52	3.19	17.4384	18.1152	16.7713	20.1	20.7988
2022-08-02	9	6.37	2.83	5.99	3.78	6.86	3.39	6.93	2.9	5.83	4.2	18.0271	22.6422	23.2554	20.097	24.486
2022-08-04	11	5.95	0.65	5.13	3.77	6.87	3.66	6.11	5.13	6.12	3.83	3.8675	19.3401	25.1442	31.3443	23.4396
2022-08-07	14	4.62	2.58	3.53	4.09	5.88	3.78	3.56	3.96	7.94	4.19	11.9196	14.4377	22.2264	14.0976	33.2686
2022-08-09	16	4.89	2.86	4.86	4.86	5.17	4.74	6.2	5.5	6.89	5.72	13.9854	23.6196	24.5058	34.1	39.4108
2022-08-11	18	5.21	3	3.96	3.96	6.02	3.93	7.48	5.19	7.68	6.72	15.63	15.6816	23.6586	38.8212	51.6096
2022-08-14	21	7.22	3.98	5.93	4.81	7.2	5.65	9.43	6.58	9.73	8.17	28.7356	28.5233	40.68	62.0494	79.4941
2022-08-17	24	7.33	3.89	5.8	4.92	7.95	5.83	10.04	7.72	9.86	8.36	28.5137	28.536	46.3485	77.5088	82.4296
2023-08-19	26	7.55	4.51	6.14	7.47	9.35	7.14	8.64	11.12	11.94	8.99	34.0505	45.8658	66.759	96.0768	107.341
Replicon / CD40 / CBT	Day	L1	W1	L2	W2	L3	W3	L4	W4	L5	W5	A1	A2	A3	A4	A5
2022-07-31	7	5.13	3.11	4.53	3.45	4.14	3.79	6.66	3.32	7.95	3.13	15.9543	15.6285	15.6906	22.1112	24.8835
2022-08-02	9	4.68	2.47	4.72	3.95	4.84	4.05	6.23	3.45	6.59	2.75	11.5596	18.644	19.602	21.4935	18.1225
2022-08-04	11	3.22	3.77	3.91	3.85	4.37	3.31	5.61	2.64	6.63	3.39	12.1394	15.0535	14.4647	14.8104	22.4757
2022-08-07	14	0	0	3.22	2.79	3.05	3.53	3.84	2.48	6.58	3.23	0	8.9838	10.7665	9.5232	21.2534
2022-08-09	16	0	0	2.76	5.14	2.62	2.13	2.54	3.66	6.96	3.96	0	14.1864	5.5806	9.2964	27.5616
2022-08-11	18	0	0	3.1	4.33	2.62	3.07	5.26	2.9	7.94	3.93	0	13.423	8.0434	15.254	31.2042
2022-08-14	21	0	0	3.17	3.63	2.08	1.88	2.08	2.08	9.15	6.03	0	11.5071	3.9104	4.3264	55.1745
2022-08-17	24	0	0	3.95	3.95	0	0	0	0	9.92	6.98	0	15.6025	0	0	69.2416
2023-08-19	26	0	0	4.09	3.55	0	0	0	0	9.99	7.45	0	14.5195	0	0	74.4255
Lipid / CBT	Day	L1	W1	L2	W2	L3	W3	L4	W4	L5	W5	L6	W6	L7	W7	A1	A2	A3	A4	A5	A6	A7
2022-07-31	7	4.95	3.12	7.18	3.83	4.89	2.86	4.05	2.67	4.92	3.36	4.59	2.71	4.17	3.02	15.444	27.4994	13.9854	10.8135	16.5312	12.4389	12.5934
2022-08-02	9	5.52	3.57	7.95	4.73	4.84	3.4	5.91	3.53	4.6	3.32	5.67	2.97	3.91	3.1	19.7064	37.6035	16.456	20.8623	15.272	16.8399	12.121
2022-08-04	11	5.72	3.4	7.91	4.54	4.87	3.34	5.31	3.3	5.14	3.43	5.78	3.23	4.25	3.37	19.448	35.9114	16.2658	17.523	17.6302	18.6694	14.3225
2022-08-07	14	5.82	3.61	7.63	4.5	3.61	3.58	4.85	3.79	4.29	3.79	5.56	3.68	4.53	4.07	21.0102	34.335	12.9238	18.3815	16.2591	20.4608	18.4371
2022-08-09	16	6.12	3.49	7.56	5.08	3.56	2.66	5.07	3.51	4.55	5.18	5.03	3.69	5.89	4.55	21.3588	38.4048	9.4696	17.7957	23.569	18.5607	26.7995
2022-08-11	18	6.14	4.13	8.06	4.12	3.49	2.11	5.7	4.31	5.12	4.41	4.92	3.38	6.02	4.92	25.3582	33.2072	7.3639	24.567	22.5792	16.6296	29.6184
2022-08-14	21	6.56	5.03	7.13	5.84	2.55	3.51	5.87	4.61	6.1	5.14	3.5	3.5	6.27	5.75	32.9968	41.6392	8.9505	27.0607	31.354	12.25	36.0525
2022-08-17	24	7.6	5.91	8.4	8.45	1.75	2.62	6.09	5.42	6.43	5.76	3.86	3.4	6.87	6.87	44.916	70.98	4.585	33.0078	37.0368	13.124	47.1969
2022-08-19	26	8.79	7.07	9.92	9.91	2.62	2.3	7.17	5.35	7.02	7.02	3.92	3.85	7.62	7.81	62.1453	98.3072	6.026	38.3595	49.2804	15.092	59.5122
