# Supplementary material for: Decoupled neoantigen cross-presentation by dendritic cells limits anti-tumor immunity against tumors with heterogeneous neoantigen expression
Source: eLife journal article supplement (doi:10.7554/elife.85263), 2023-08-07

KP-Het<sup>High</sup>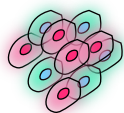

50% KP<sup>mCherry-Aatf</sup>  
50% KP<sup>ZsGreen-Adpgk</sup>

KP-Het<sup>Low</sup>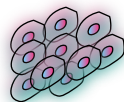

100%  
KP<sup>m</sup>Cherry-Aatf;ZsGreen-Adpgk

C57BL/6

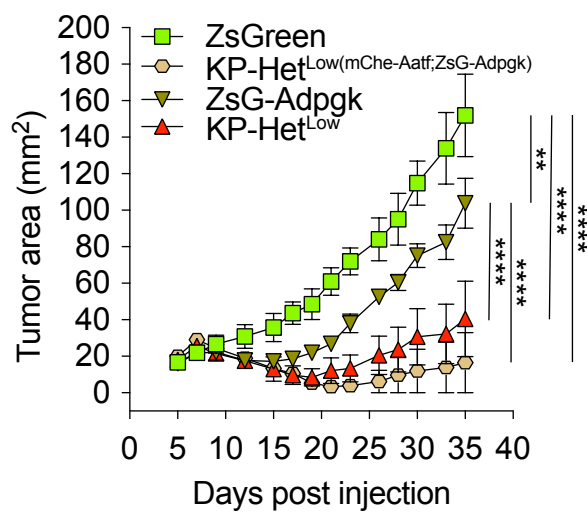

Supplement: supp [file elife-85263-supp-v1.zip]
