# Supplementary material for: Decoupled neoantigen cross-presentation by dendritic cells limits anti-tumor immunity against tumors with heterogeneous neoantigen expression
Source: eLife. 2023 Aug 7;12:e85263. doi: 10.7554/eLife.85263 (PMC10425174; doi:10.7554/eLife.85263)
Supplement: Supplementary file 1. [file elife-85263-supp1.xlsx]

## Sheet: Sheet1
Marker	Clone	Conjugate	Company	Catalog #
CD103	M290	PE-CF594	BD Horizon	565849
CD103	2E7	APC	eBioscience	17-1031-82
CD11b	M1/70	BUV737	BD Biosciences	612800
CD11b	M1/70	BV421	BioLegend	101235
CD11b	M1/70	BUV396	BD Biosciences	565976
CD11c	N418	BUV496	BD Biosciences	750450
CD16/32	93	n/a	BioLegend	101330
CD19	1D3	APC-Cy7	BD Pharmingen	557655
CD19	1D3	BUV510	BD Biosciences	562956
CD3e	145-2C11	BUV496	BD Horizon	612955
CD3e	17A2	BUV661	BD Optibuild	741562
CD3e	17A2	APC-Cy7	BioLegend	100222
CD3e	17A2	BV711	BioLegend	100241
CD3e	17A2	PE	BioLegend	100206
CD3e	17A2	Qdot705	BD Biosciences	612803
CD4	RM4-5	BUV737	BD Horizon	564933
CD4	RM4-5	PerCP-Cy5.5	BioLegend	100540
CD4	RM4-5	BV650	BioLegend	100555
CD40	3/23	BV711	BD Optibuild	740700
CD44	IM7	Ax700	BioLegend	103025
CD44	IM7	AF488	BioLegend	103015
CD44	IM7	BUV661	BD Optibuild	741471
CD44	IM7	BV480	BD Horizon	566116
CD45	30-F11	BUV563	BD Biosciences	612924
CD45	30-F11	BV786	BD Horizon	564225
CD45	30-F11	BUV395	BD Horizon	564279
CD45.1	A20	BUV395	BD Horizon	565212
CD45.2	104	BUV563	BD Optibuild	741273
CD62L	MEL-14	BV605	BioLegend	104437
CD62L	MEL-14	BV785	BioLegend	104440
CD62L	MEL-14	BV650	Biolegend	104453
CD80	16-10A1	PE-Cy7	BioLegend	104733
CD80	16-10A1	PE-Cy5	Biolegend	104712
CD86	PO3	AF700	BioLegend	105122
CD86	PO3	PE	BioLegend	105106
CD86	GL-1	BV785	BioLegend	105043
CD8a	53-6.7	BUV737	BD Horizon	564297
CD8a	53-6.7	BUV805	BD Horizon	612898
CD8a	53-6.7	AF488	BioLegend	100723
CD8a	53-6.7	BV605	BioLegend	100744
CD8a	53-6.7	Ax700	BioLegend	100729
F4/80	BM8	BV650	BioLegend	123149
H2-Db	KH95	FITC	BioLegend	111505
H2-Kb	AF6-88.5	PE-Cy7	BioLegend	116520
Live dead	n/a	eFluor780	eBioscience	65-0865-18
Live dead	n/a	BV510	Biolegend	423101
Ly-6C	HK1.4	PE	BioLegend	128007
Ly-6C	HK1.4	AF700	BioLegend	128023
MHC-II	M5/114.15.2	BUV805	BD Biosciences	748844
MHC-II	M5/114.15.2	BV510	BioLegend	107636
MHC-II	M5/114.15.2	APC-Cy7	BioLegend	107628
NK1.1	PK136	APC-Cy7	BioLegend	108724
NK1.1	PK136	AF488	BioLegend	108710
