# Supplementary figures and images for: Decoupled neoantigen cross-presentation by dendritic cells limits anti-tumor immunity against tumors with heterogeneous neoantigen expression
Source: eLife journal article supplement (doi:10.7554/elife.85263), 2023-08-07

**A**

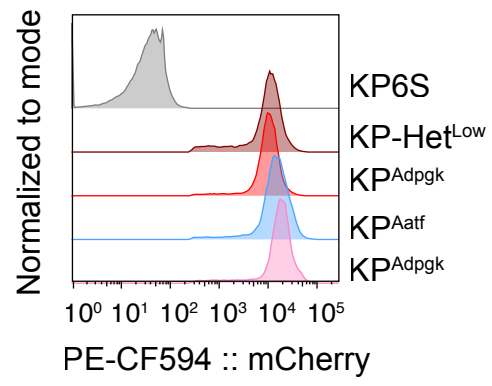

Supplement: supp [file elife-85263-supp-v1.zip]

**A**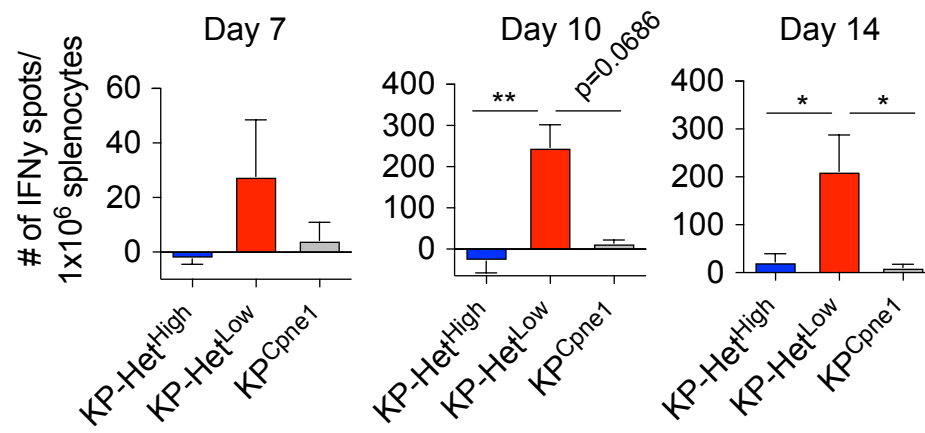**B**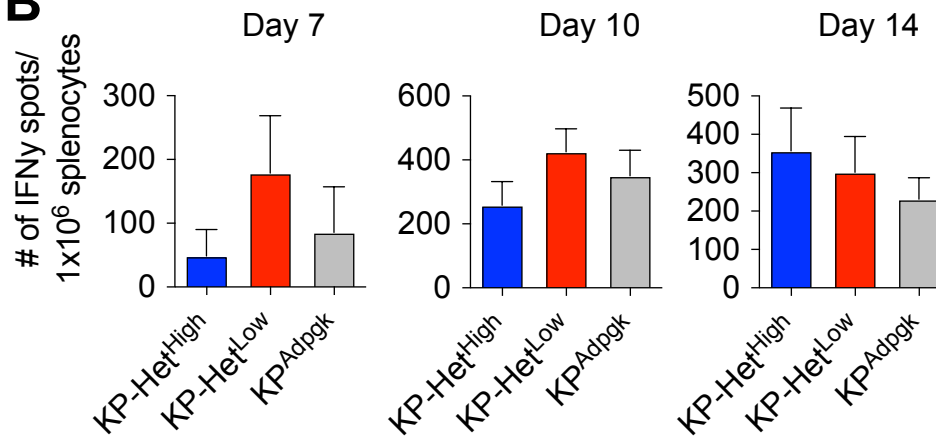

Supplement: supp [file elife-85263-supp-v1.zip]

**A**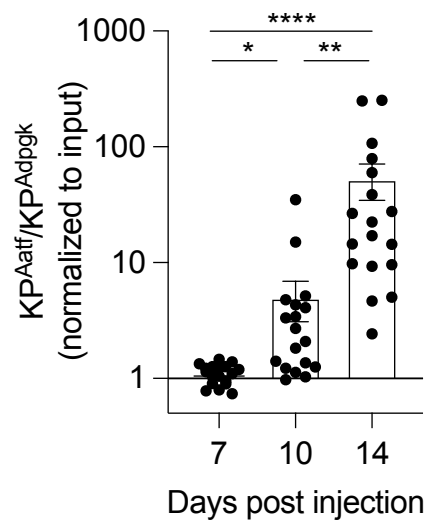**B**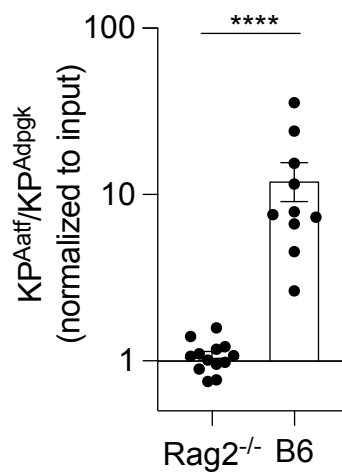

Supplement: supp [file elife-85263-supp-v1.zip]

**A**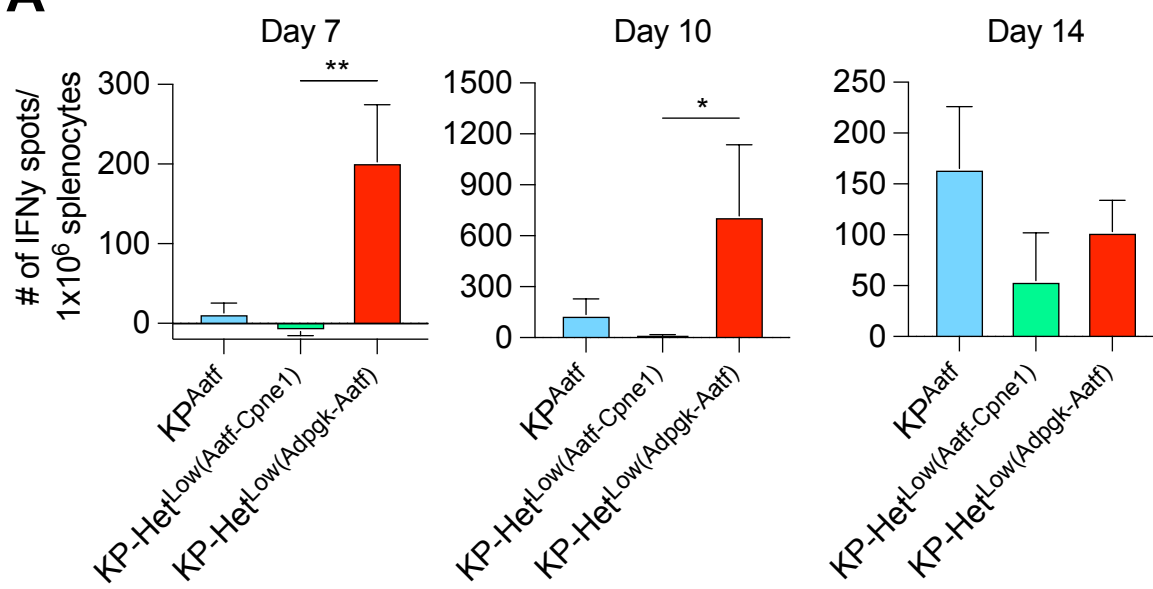

Supplement: supp [file elife-85263-supp-v1.zip]

**A**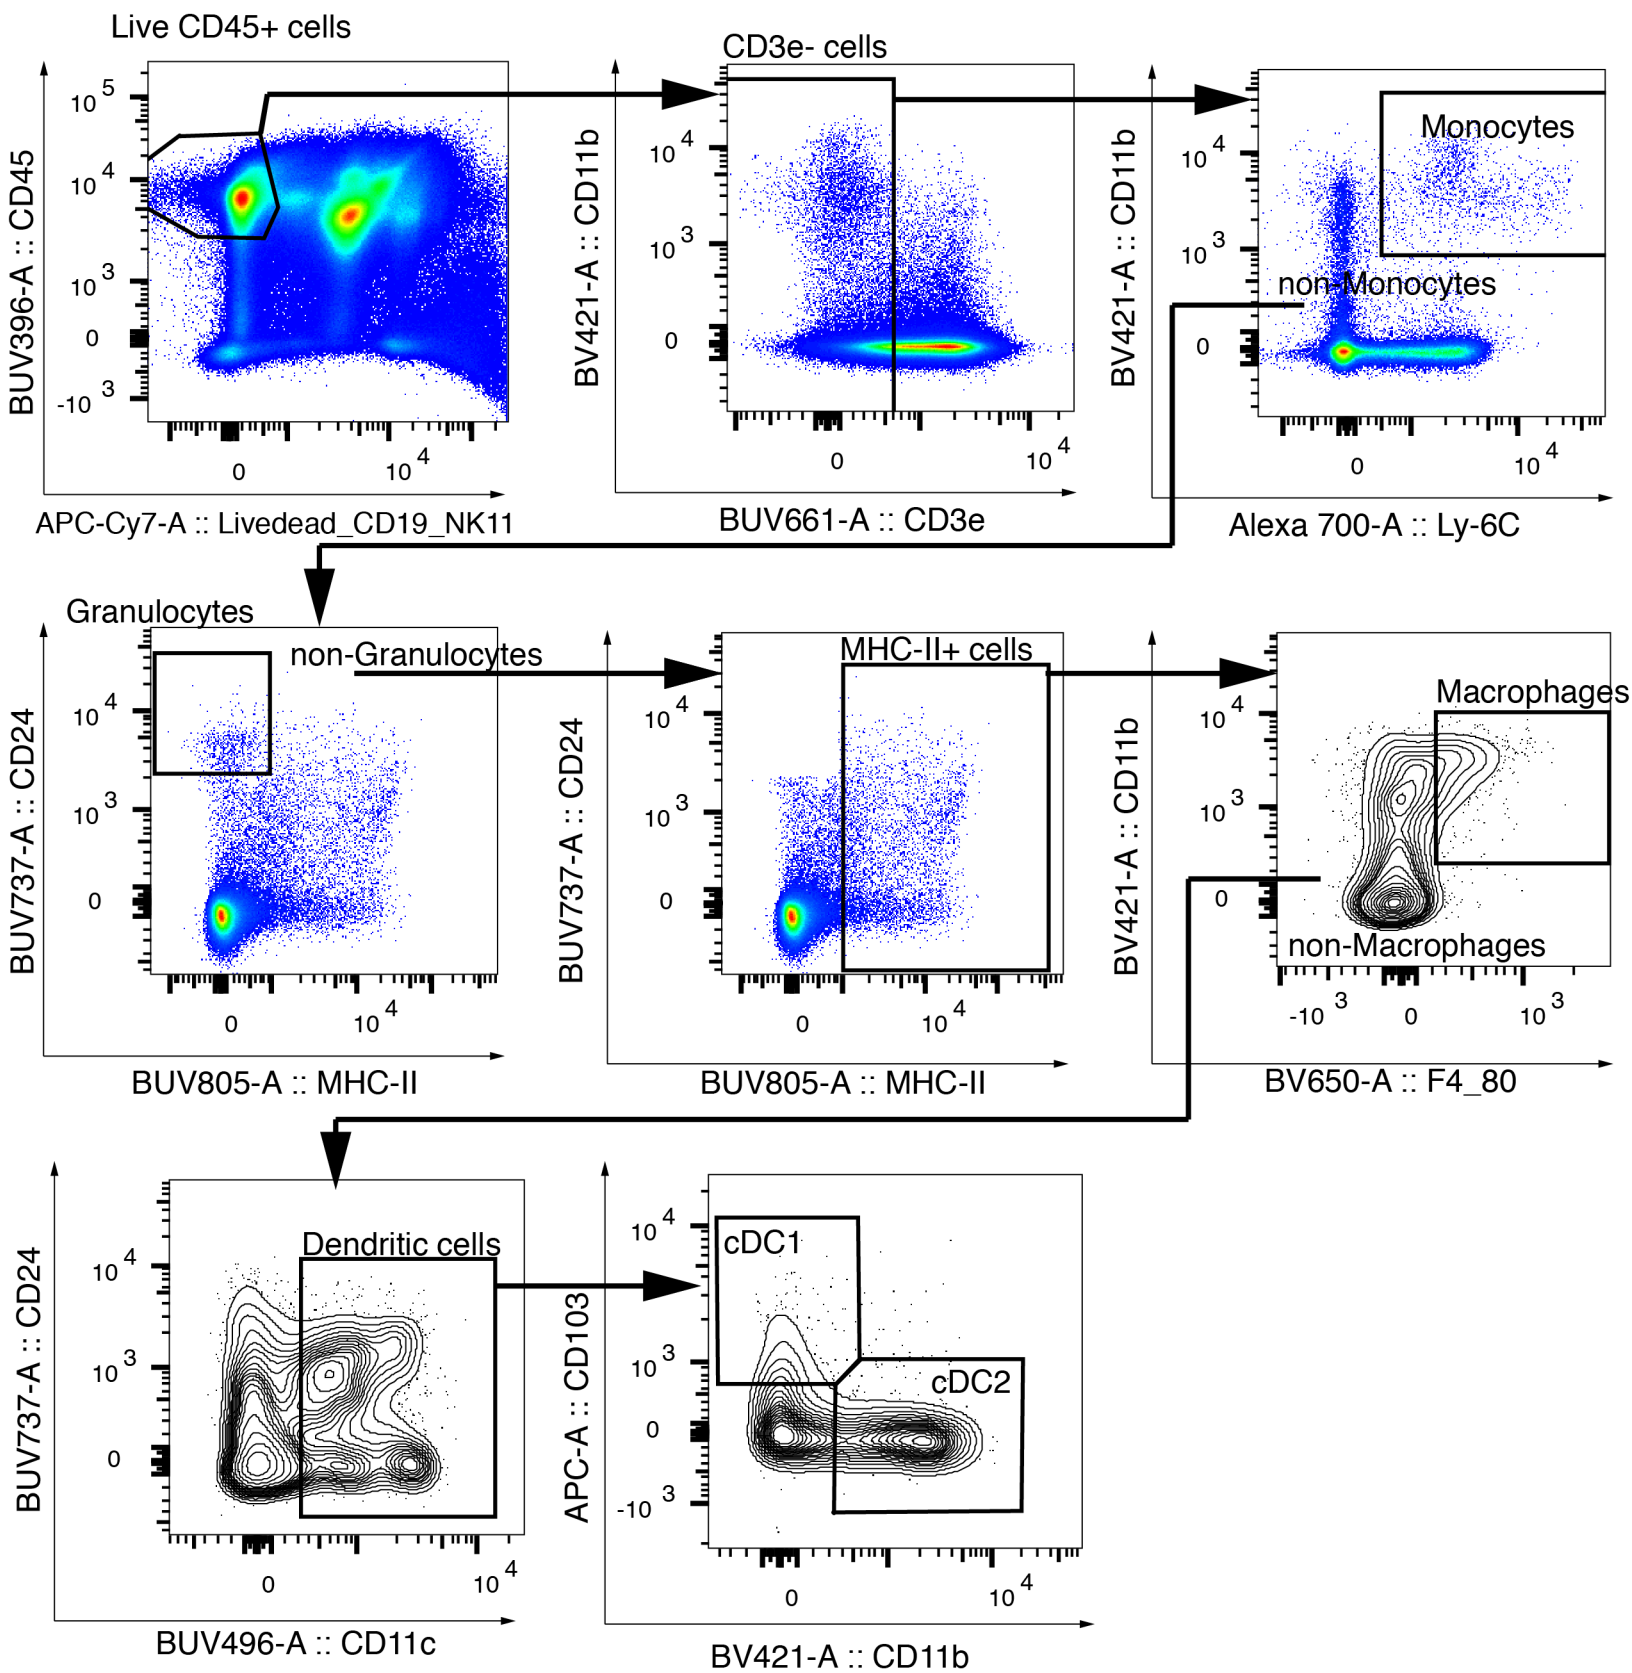

Supplement: supp [file elife-85263-supp-v1.zip]

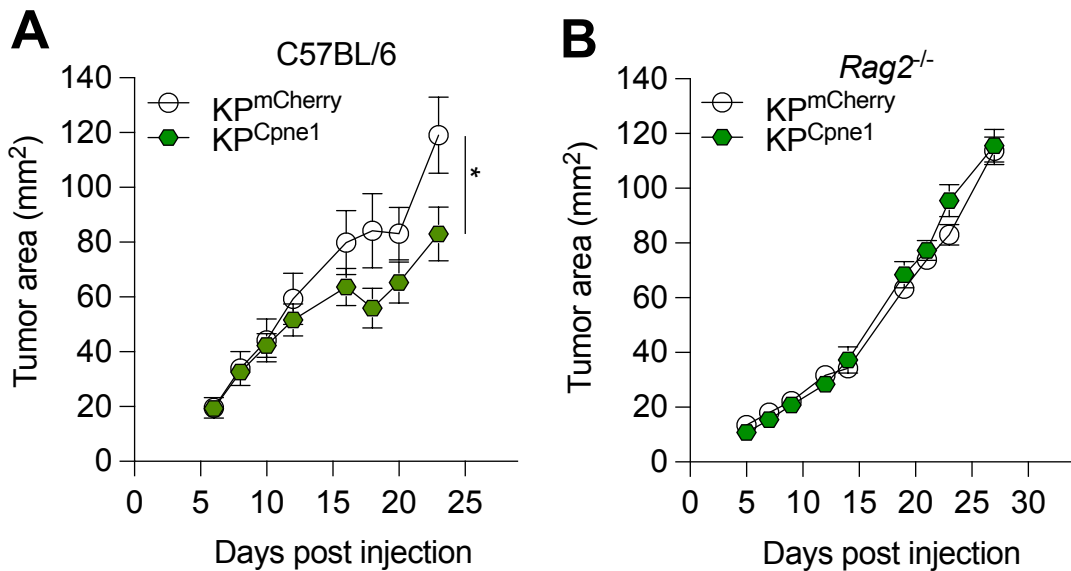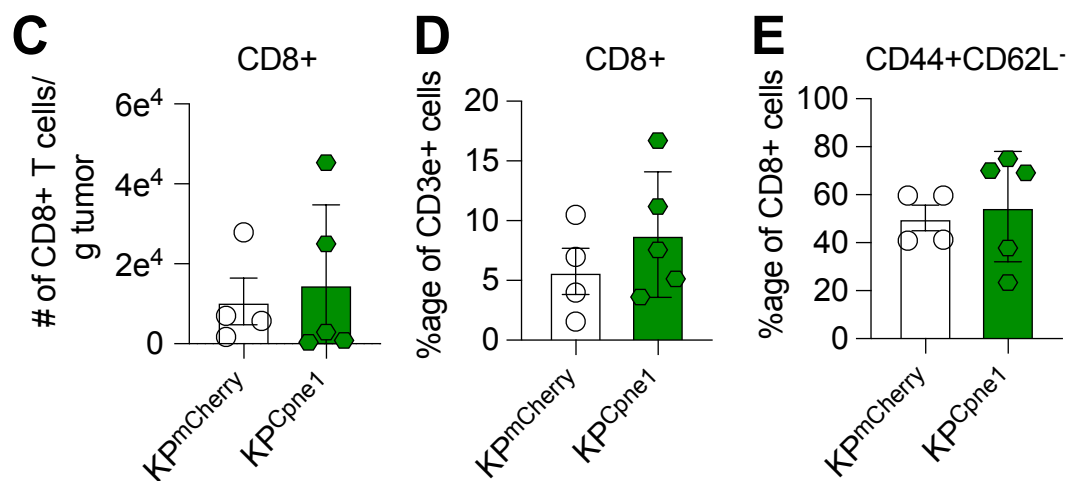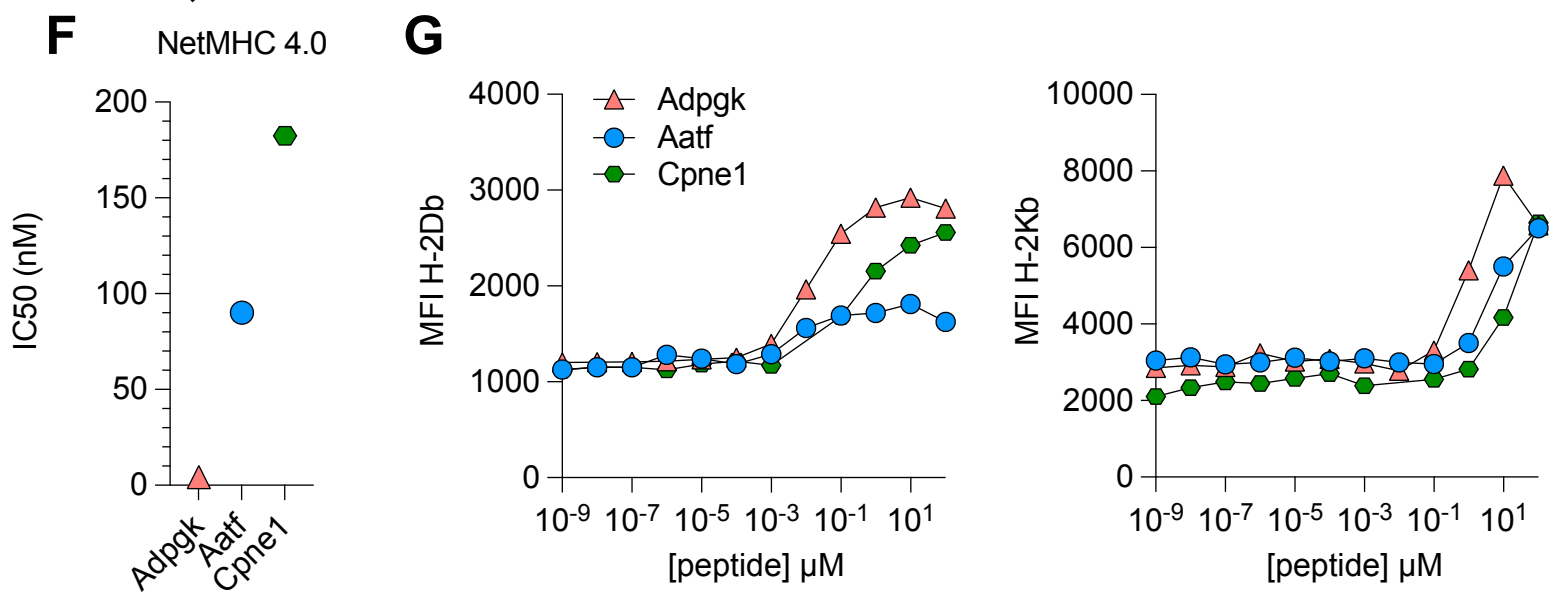

Supplement: supp [file elife-85263-supp-v1.zip]
